# Supplementary material for: Development of the first high-density linkage map in the maize weevil, Sitophilus zeamais
Source: PeerJ. 2023 Jun 15;11:e15414. doi: 10.7717/peerj.15414 (PMC10276983; doi:10.7717/peerj.15414)
Supplement: Supplemental Information 1 — The sequence of each SNP contained in the linkage map is listed with its ID, linkage group (LG), and position (POS) on the linkage group. [file peerj-11-15414-s001.xlsx]

## Sheet: SuppTable1
ID	LG	POS	SEQUENCE
168	7	39.4315	AATTCTGAACTAAGCAATATTAAAACCGATTTGCTTCAGAATTGTTACTCTGCCAAATTCCTGGATAATATTATAACCAATTGAAAGTCTGACTGATTGGTGCGCCAGCCTGAGG
171	5	106.382	AATTCCAATAATGTTGTATTATTTTCATCTATTAATATATTTAATGTAAAAATACGAGGTATTAAGATATCATACTTTACTTGGTATTTTTATTTTCAAACCTTCAGGTTTTCTT
221	1	21.5019	AATTCTAGATCTCACGAATCCACCGTTGTTTTAATTAATGTGTATACTTAGACGAAAACAAAGTTTCGCTCTGCAAATTGAAAAGTTTCTGATCTACAGGTCGTCTTTTTACGTT
1536	5	18.922	AATTCCTCATTGGTTGTTCCATTTAAAATAAAAAATTAACTTGCTGTTAAAGGTATCCAATAATATTCAATATTAATTTTGTTTCACCCTATATAACTTTTTGGGTCAAGTTTTA
1688	3	159.057	AATTCATTTACCTTGGCAGTTTGATCTCGGAGAAGGCAAATCAACTCTGAAATTCAGCACAGGATTAACAGCGCCTCAAGAGCATTCTGGAAATTAAAAGACAGGGGTTTTCTAC
1832	9	24.7389	AATTCATTTCTGAACATCTACAAAAGAATTAGTTGAACTGAGAATAGTATTAGCGGTGTATGACTTGTTTGCTGTTTATTACTCACACGTCTCGCTCATACCACATAGATCCACA
2351	5	217.634	AATTCCGAAATAACGCCATGGTTTATAACTCCACAAGTAGAGTAAAAACATTTTTCATACCACGAAATTATAAAACAAGCTGGAAAAAAATAGCATCAAATAGTACAACAACGGG
2705	3	82.7457	AATTCTTATGAAAATTTCACATTGGTAATTGGTACACAATCAAAATGGTTTATGTTGACAGGTTACTATCTCATTGTTTGTTCATTTGAAGTTGAATATTTAGACTTAGGTTCTT
2752	5	193.734	AATTCTATTTGAATATGTCATATACAAGATGACGTATCTAGTCCAATTCCAATATTTTGTTAAAAAATTAATCCTCATGCAACACGTTTTGATATAAAAGATATTAGTATATCGT
2836	8	50.6366	AATTCATTTTTGGAGAACGTTCGATCCCCAAGAACGCATGAGAATAAACGAACAAATATCGAGAATGTACAGGGTGTCCCATTAAGAATAGGTCTCGACTGTATCTTGGAAAGTA
2985	3	144.179	AATTCGCAAATCCCAGTTTCGAATAGAGCACCCAAAATACATATAGAAAAGCTTAATAGAAAATAAGAAATCAAAACTATCCCAAAGCTTTCGTGCTAAGGATTTTTTTGAGCAC
2990	7	28.9472	AATTCTCCGTAAAATTAACTCTCGCAAATTGTGACAGTGACCTTTATTTACGCTTAGATAAGTGGGTTTTGGTGAAGCTTAAAAATTGTAAGATTCTCCAGCTTATCAATACCAT
3197	10	25.4994	AATTCTTTAAACCTCTAGTTTTGAGCATGCGCAAATCAATTTTGAATTAACATTAGCCCTAAGAATGTAGAATATCCCATATGTCTTAGGACCCGTTAGAACTAGGGCTACTGTT
3551	5	4.75096	AATTCTACTTTTATATTTTACGTTGTTGAGCAACACTTTAAACAGCTAGTTTTCGTATATTTATAGTTTACTTTTCCGTCTTCCATAATTACTTTTTAAATATAAGTAATAGTAT
4304	10	35.7264	AATTCTTGATCAGAATTGCTTAAATTGATCAAATATATATTTGTTTTGAAAATATTACTACATCATTTCGAGAAATGGATTCGCTTGCTCTAAAATGATATAGTATTGAATTATG
4347	3	129.5	AATTCCAGCCGATTTGGCGATAATATAATCCGCTTTTCTTGCTCTGTTATTAATTGGTAGGTGATAAATGATCCACGTTTCGGTATTTGTCTGAAGACGACGCGACACGGAGCAA
4349	1	54.0165	AATTCAATTATTGCAAAAAATATCAGTATATTGGAACTGAAAACAGAAAAGTTTATAAAATCAAAATATTTATTTTTCATAAAACGCCACTGGATTTGGAGTTCATAGACACAAA
4461	7	52.6129	AATTCTTTTTATTTAATTCGGAAGTAAATTTTTTTTTTATTTAATTCCGAAGTAAAAATCATCAATTACACCATTGGAAAACCACAAAACGCCAGTACTTTTGGAGACCTCGCTG
4617	5	109.846	AATTCATCAAGTGAATGAATATTATGATTTTTTCTTATTTGTATCGTCTTCGTTTGTGTGATAGACCTGGCTCCTCAGATTTATTGTTGGTTTCTTTTGTAGCTTCGTAGTTCAT
4764	1	77.8404	AATTCATCTGACTGGCATGCTACAAAAAGTTTTTTATTATTGCACGTTTGGACAAGTATTTATAAATCCAGAGACAGATGTTAGTGAATTTAATCGTAAAAACTGTAAAGCATTT
4822	8	142.65	AATTCTTCATTTGTTTGTGGTCGATAATCCACTTTAGCTCCACATTTCAGCAGCAGCCGAACAAATTCCGTATATCTACAAAATAAAGCAAAAAACTCTATTGTGGCGGCTATAA
4832	3	3.39973	AATTCATTTTGAATCGGTCCGAAATTCGAACAACAAAGAAGAATGGAACACACAAATAAGTCAAGAGGAAAAATCGCCCCTTGTTTGTTCGGCGCGTTCTTTCGATGAGATCCGT
4947	4	68.6045	AATTCTTGTTATAATAATTAATCTTATTTTACATTTAAAATTTTCCAATAAATTTTGAAATACCTTGTGTATACAATACTTCAAAAAAATATATATAAAAATATAGATTTTTTAA
4967	9	42.2344	AATTCTTATTTATTAATGCCCTTTTTTCACCTTATTGGGTAGCGTGTTGAGGAACGGATTGCGGAAGTATCAAGAACTCTCACATTTAGTTAACCAAGAAAGATCGGACCATTAA
5235	9	17.603	AATTCCCAACTCCGACAACGGCGCCACCAATTTCCATCGCTTCCCCAGCGTTCCGCCAACATCGCCAGTGTAGTTCCGAGTTGCGTCACGCGCTGGTTTCCCCTCGCGGTGCGTG
5495	5	136.627	AATTCTGCAACAGAAAACTCTTCATAACATTTTGCAAGTACAGTAGGAAAATGTTTTGTATCTTCCTCGTATTCACTCTAAAAACGTTTCCGTAAGTATGAAAAAAGTGAAAAAA
5545	7	26.0455	AATTCCCACAAGAAAGGAAAGCGTCGGCGGCCACCGTAATTTGATTTGCTGCGCATTGAACGTTATCTAGGACGGACGTGTCGAGTGTCGATAGCGGCAAGGACGTCTTATGGGA
5722	1	30.6896	AATTCATGTAATTTATTAGTTTACTTATTTTAAATTATACATTGGGAACTTTTTAGTGCGTGGTTTAAATAAATATAGCTAAATATAAAGGAATATCTATGGAGGGATAGAAGCA
5869	4	35.4583	AATTCCTTCAAAACGGCCATAGCACTTTTTACGTTCGTTTCATTTTTTCTACAATTTCCACTCCTCCATGTCCAGTTCTTCTATGGTACATCAAAATTAATAATTTGTTTGCTAA
5907	3	52.6181	AATTCAAAAATCGATATCTCGAAATCTATTACAAATAATTGATTGTAGTTTTTTCAAAAACTTTCTTAACATTTCCTGCTATATTTTCTTCACAGAGAGTATGTGAAAATTTTTA
5910	5	63.0901	AATTCATTGTTTCAGCTCTGTGTGTATGTTTTTTATGTTCATATTTCCGATCTTTTAATGTCATTTTAAAATCGCAACATGTTTTAAGATAAAACATTTTTAACCATGAATCGTT
5911	3	101.87	AATTCACTAAGGAACAGATTACTTTAAATCTGCATACATTTACTCAACGGACATTGCAGTATAAAATTTCTAAAGTTATGTGGAGTACTATTAATTTGCTGTTGCTTAAGTCCAT
5943	8	147.494	AATTCATAATAACATACATCAGAATTGAACAACTATACCGTGTGGTGCATCAGAACACGGGACATAGGATATCCCGTGTAAATTTTGAAAAGATCAAATATTATCTCCACAGATG
6022	9	50.4691	AATTCTCTGGATCACGGTGTTGTTTGTGACATGGTAAGTGTCTGAAATATAGAGCATGCAGCGATAGCACCACATTTCAAAGGCTTCCATGCGTTTAGATGTGCATCTGTCAAGA
6039	8	180.531	AATTCTCGGACAGGCTGTCGGTAACGCCACCTACATCTCGGACAGGTTTTGTGCCACGAAATCGTCCATCAGGTTGCGCATCTTCTATTTCTTCAATCAACGCTAGTAAGCAGTA
6188	3	40.034	AATTCACAGGCAAATTGTATTTTGTGTCATATTTCGAATGTTTTCTGCCGAAATCTTCCCTGAGTCGTTGGACAGATTACTGCTCATACACCTATATCCATAGGAATAACAAAGT
6247	10	56.8641	AATTCAAAAATCGATATCTCGAAATCCATTAGAAATAATTGATTGTAGATTGTAGTTTTTATTTCAAAAATTTTCTTAATATTTCTACTATATTTTCTTCGAAGAGAGTATGTGA
6401	2	8.8006	AATTCCCACCTCTATGCTATACCCTTTAATTGAAGGAAAACGATTATTTAATTTAGAAATAGAATTATCTATGCTGTCAGAATGTGTTAAAAAAGACAAACTCTTGGAGCATACT
6402	8	180.531	AATTCACATCTTTCGCATAGCCAGACGAGTAGAACAGCAACAAGATTTATTGGCCCGTCCTATTTCTGTCGTTGGCGAGGGGTTGTAAAAAATTGGCGCCACCAGCCCTCGTACC
6574	3	159.056	AATTCTTTCTAATAAGCGGGTTTCTTGTCTTTTAAAGTTGCTATAGCAACATCAAGAACTTGAGAAAAGTAAAAGTCTAATTTAATTATTGATCCGACGGGCGTTATTTATAAGG
6670	5	52.2697	AATTCTCAGAATGTTGTTACCTAATAAACAATTTTATATCAAATATAGAAATAATTTTAGTGTTCTTACCTATTATCGAATATAATACCAGAATCGCGGTGAAAAACCCTCTTCT
6735	8	46.5003	AATTCTTCTTACCAATCCGCCGACTTCGAGCGCTAACAGCAATAGTTCTAGCTCGCAACAGGACGAGAATCGCGATCGTATTTTAAAGGAGTTGCTAAATCAACAGGACGATGAT
6859	4	38.7381	AATTCTTATCCCCGCGATCATCTGGCAACGACTATATTGAATTTGTTAAATAAACGAATTTCTAAATTAATTAAAACAGATGTTACGCAGATTGTCGAAAAAGATTAAGTCAAAC
6868	1	48.054	AATTCAATTACCTCGGCAGTTTGATTTCAGAAAATGCCAATATCGACTCTGAAATTCAGCACAGGATTAGCAGCACCTCAAGAGCATTCTGGAAATTAAAACAATTCAAACAAAT
6978	3	46.8354	AATTCCGATACATACTCCAATAGTTCTTCTCCGATTTTTATAGCACTGTTATGATTTTTCGGGGGAGTGCACATGATTTTAATTTTGTCGATGTTCAGCTAAGGCCCAAAGTCTC
6981	3	52.618	AATTCCTCACTTAAAAACGCAGGCTCTCCCACAGATATATTACCACAAGGTCCAATGTTTAATAAAGAATCACATACTTCAAAAATATAGCTTGTGATTTGCACACCAGCTTGTT
7129	1	46.0814	AATTCTGTCAAATATGAGGCAAGAGACGAAAGCAAATGAAAATGACGATTATGAAGAATTAGGTCATGAAACTAATGAGGATGAAAATAAAAGCGACCTAGAGGAACACAATACT
7185	6	113.288	AATTCTGTAACTTCTTCAGGAAGCATTTGAGGGCATATGTTCATAGGAACTCTTTGTTTTATTTTCATCTGTAGAACCTTCCACCGAAGTTAGATACACGATTTTTTTGACACCC
7254	8	107.244	AATTCATGTTTTTTCAAAATAATATTAAGGCTACCTACCCATTAGTCTTTGTCTGAGGAGTAGGCTAGTAGTAGTATACTAGCGTGTACCCGCGACTTCGTCGCTTCGAATTAAT
7259	1	54.0166	AATTCCGAGGTTTGTATCCCATAAGGGCTTAAAGCACTCCACTATATGTTATTTTAAAACGCTATCGGTTTGTATTTTACATAGGAATATCACACCTTTGCACTGTACTTACTTC
7265	9	6.3682	AATTCCAGATGTGAAACGTATTCTCAACTTATTTTATTTTATTTCGAGTTACGTATTTTTTTAGGTTTTAAAATATAGGGTTTTGCTTAACAATAGCCGTCCTAGTTAGGAATAA
7330	5	95.2898	AATTCTGACAAGACAAACTTGAGACAAATTGTCCACACCGCAACGACAAAAGTACAACAAAGTCAAAAGTTTAGTTTTTGCGAATGAGTTTTATTAACCATGCATGTGTGATTTC
7407	9	0	AATTCTATTTCCTTTATATATTTCCTCTTTTATTAAATCTGGCCTGCATCTCGTATTTTAGCTTCATACATGCATGCTCAAAATTCTTGCTCTAAATTTTTTAAATTCAATATTC
7492	8	83.7009	AATTCGACAGCATCCAGTTACCCGCATTAGAGAACAACGTTTAGTTTGTTTCCTTCCTTTTGTTATACAGGGTGTAAACGAATAATGCGAAGAAACTCAGTAGGTGGTCGCTATA
7522	9	1.94012	AATTCTGCTTCAATGTTATCGACGTTGTTCTCAACAGCCACGTCCTGGTTGAGATGATTTTGGATACTCTTTCTCAATTGGTTATACAGGGATTCGAGAGTGGATTTGAGATGTT
7531	8	107.245	AATTCTCAGCTAACAGTTTTCCATTACGTACAAGTCCAACCTAATAATTAAACATACAATGTTATAAAAAAGTTGTTATGTTATTCTGAAACAGTGTCTCAAAAAAATGTTTACC
7577	5	126.488	AATTCGCCCATTATGCTGCGTATCTTCCCAATTCTTTCAATCAACGGTACTATCCACATTTAGTGTAATAATCTATATAACTATCCATCTTTTGTTTATTATTGGTTAGTTTTGT
7587	3	47.3163	AATTCGTTTCCTCCACAGTTATCAATGTCAGAATCAATAGTGTTTAGGTCCTCTTCGATTTTCTTGGCGCTGTTCAGCGCGTCGTTCACGTAACCTTGGGCCTTTTCAACTTGAG
7641	4	38.7383	AATTCCGAGATTTAGTTTAGCTCTGCGCCGCTGCGCGCTGATAGTTGTTTACAGCGCAGCGGATAACGAATACTCTAGCAAATCGTAACCGTAGTTCTGCTTTCAGTCGACAGAC
7663	6	113.29	AATTCTTGAGAAAAATTTTCCATGTTAAATAAAACAGATTTATCAATCAATATATATATGTACTTATATAATATCCTAGTTGTTGTTTATTTTAGTTGGAGTTTGTGATTTAAAA
7680	5	118.178	AATTCCGCGTAATCTAAGAAACTACTAGACGAAACATCGTCTAGTTTAGCAAAAACGAGACGTTAACTTAAAAAATTCTTTATTTCAAAAGTTCCTAAAAACCCTAGTTTAGACA
7689	3	99.2584	AATTCTATTTTTGTAACAGTATTTCGTCTATATTCCCAAGTTCACTACTCGATACTACTATATTTTAAATGAGTTACATATAAAACGACTCTAATTTATGGCCTTAATTAACAGT
7732	5	12.5591	AATTCACAGGGGGTCCTCTATAAATAGCACACGCTTTATTTGTACCAATTTCGTCCAAAAGGTTAAACAATCAATAAATACGGATTTTGATTTGAATTTGAATAACAAACTTTTC
7751	5	196.151	AATTCTTAAGACTAGAGTCCAAATATTACGAAAGCACTTACAGCAATAACATTAACAAAAGTCGTTTTTCCTGAATATTGTAATCCTACCAATGTTAATTCCATTTCTTCTTTCC
7816	5	172.031	AATTCAATAAGAAAACTAAAAAAAACGCTAAAAAGGTGGAGTGGACTGTTTATTTACCTATTAAACGTAACTCCTGGCTCTTTTTTTAGCTCTGAGGCTATTACACTTGAAAGCT
7825	10	14.5448	AATTCAAGGACCTTTCCAAGGAAGAGCTTGATAATTGGGTACAAGTTGATAAATTGGATGAAGAAGAGATATCAAACCGCGAATTAGTTGACCTTACAGGGTGTGAAGGTGAGAA
7886	6	0.0001	AATTCACTGAGGCGTCGTTTCTTGTTCACTGTCATTGATATCTTAATTATTAAATATTAATACCTAGTATTATGGTATTCTGGTACATTGTCGATTTTTTTAATAAAACAATCTT
7960	3	41.4849	AATTCTGATAGACATAATTCTACTTATAATTTTTATTTAATGGCAAGAATGAGTGATAAAACTTACGAAATTCTGGATTTAATGAGGTAAAATGAAAATATTACATTTGAGCCGA
8007	1	45.5883	AATTCCGCATTAGGTCGTATACACAGTTGTGCTGATTTAGAGTTGACATCTCTCATAACGAATGGGGAGAAGCCTGAAAATTAATAAAATTCATATTTTGAATATTGAAACAATA
8029	3	180.642	AATTCCTTGAAAAAACGAACGTTAAAAAATATATAGACTCCCACGCAGATCTTATTTTATAGATACCTGCAAAGCATTCAGTTTCTTCCAGTTTTGTTTAGACAAAAGTTTATTA
8067	2	90.2691	AATTCCTCGTGGGTACCAAGCTGTCATTTTTGTGGTCCATCTGTCGTCCGTTCTTCTTGCCAGGTGTCCTGTCCATTGCCATTTTGAGGGACTTGACTCTACTAGCCGCCGATAT
8069	3	34.9564	AATTCACATAATTAATATAAATGTACAGAAATTATTTTATTTAAATAATTTAAGTTTAAGTCCTCGCACCAAGATGGCGTTCTAAGTATTGTTATTATCTTTTATTTTTTCTTCA
8365	3	4.09182	AATTCAACCGCGAAAAACACTTTTATGTGGTAAATATGAAAGTAGATGGACGGCGATACGGCCGCTCGTAGACGAATCTAACAAGTTCAAAGCGACCCGTTCTGATTTATATCGC
8420	3	46.8351	AATTCCAGCATTGGTACTGTTTATGGTGTTATATTATGGAAATTTTTATATTGGACTCCTTTTTAGTGGCTTCTTTAAAATTACGCACTATTCAAAAAGTTCGAAATTCATTGGA
8448	8	107.245	AATTCATCATACAGTCTCAGGGCTTTAACAAAAACCAATCTAAGACGGCTCCATAGAGACTAGCACTCCATGCATCGACATCAGCCGTACCAAAGTTCATGGCACGAACGGCCGT
8474	3	150.039	AATTCAAAATGAATCCATATCAAAATCTATTAAAAATAATTGATTGTAGTTTTTTCAAAAACTTTCTTAACATTTCTGCTATATTTTCTTGGCAGACAGTATGTGAAAATCTTTA
8491	1	44.6026	AATTCTCCTAATGGCTTTTAATTTTTCCTCAATAGGAACGACAATTCTTTTACGTTTGTTTCAGTTGGTATCCACTTAACTCCAAAAGCAGTTGGTATCCACTTAACTAGAACTC
8696	11	49.2578	AATTCTATGTGAAAAACTCTATGGGACTTAGTTTTCACATTTCCGATAAATTATAACATAACTGAGACATGAAGTATGAAGGGAAATGCAACATTTTCAATTTCGCCCTGTATTT
8755	1	58.676	AATTCGTCCGACGGCTATTTGGAAAAAACACGACGGAAAGTCCGCTCCATCTGAAAGCACTGTTACAGCGCTTTCAGATGGAGCGGACCGTCCGCGCGGATGTTTACGCGCGGAC
8776	4	32.9262	AATTCCTGTATGGGAAAAATTTGTATAGCGACTGTTTTTAAATACCATCGAAATATTTGGATGCATGTTTAAAGCGACGCATGAATTTTTTGGAGAAGTGTATTTAATTGAGGGA
8794	2	33.2465	AATTCATCAAGATAAGAAAAAAATCAAAAACTTCATAATAAAATTGAGTTATTAAAAGTAAAGCCTAAAACTGTCATATAAATATATTTCTATGCAGTTTTTTTTAAATAAAAGG
8795	1	11.3031	AATTCGCCCATTAGGCTGCGTATCTTCCCAATTCTTTCAATCATCGATATTACTATAAACCTCTAATAATATCTGTCCAACCAAAGAAGCTTCTCCGTAACACCGAACTATACTG
8803	8	147.494	AATTCTATAGGGTGCATTTCAGTTGATTTTAAAAATTTCGACAGTAGCGCTCGATACGACAGAAATCAGAAGTTTTCGGTTCTGTATTTTACGCAGTTCCGATGTGAACCATTGA
8924	1	93.7726	AATTCATATAGCCCAGGGCCTTTTTTAGCTGTTGCATTTAAACCTTCTAAAAATCAATAAAAATATTACAATATGTTGCTCAAGTTCAAACAAATTAAAGCATCTCACTATGTAA
8959	1	16.6227	AATTCTATTTCAACTTTCATAGTTGCATCTCCAATATTCCAATATTGGTAGTTTTCCAAGCAAAATGCTAGGTAGCAATCAACAGTTAAGTTCTACTTGTACTATATCTAAGGAC
8979	8	162.067	AATTCGTTTTGGGCGCAGAGGCGGACGCGGAGTCATTTGTTTTTTTCCCTCGGGGTCGTTCCACCGCCCTTGTTAACCTCAAATTTAAATTTATTCCCTCCACTCAGCGCCTCCT
9004	9	8.84961	AATTCTATTTCCTTTAATATGACAGAAAGGGCTTGTAAGTCCAAGACCTTGACAGGAAAAGATATCGTCACCTTGTTTCGACATTTGATTTCGTCAACTGACTTGTTGTCCTGTT
9014	4	72.5255	AATTCAATAAAAGTTTCCTTAATATATTCTTCAAAATATTCCTCTATCCATAAATAACTTGGTTGGAATTTCGCAATAAAAAAGGTAGTAACATTTAATATTTTATTTTCCTTCG
9046	10	40.2317	AATTCACAAATTGATATTGCGAAATCCATTAGAAATAATTGATTGTAGTTTTTTTCAAAAACTCTCTTATTATATCTGCTATATTTTCTTCGCAGACAGTATGTGAAAATCTTTA
9087	9	5.37588	AATTCAATTGACGAAAAGGCGTATCTGTGGATAAACGAAATAAAACACCTTTACATCCACAAAACCTTGCAGTATTTATTTTTAGACATGTGGGATACTTTTAGAGTCTTAGAGA
9124	8	72.878	AATTCTTCTCTGCCCCGAATAACAGAATAACTATTAAAACGTCGGAAAAATTTACGGATAATAGAGAAAATTAATTTTTAAGTAATATAGGTTTGGAACGCGTATAGCTTATTTG
9166	7	99.6483	AATTCCCTATTTCTCTTTCACTGTTTGGGCTTCACTTTTTCGAGATTAGGCTGAGTGTATTTAGTTATATGTATATGCAACACTGCCGCTATCACGTTTCCTCTCGCTAGCTCAT
9168	2	19.3331	AATTCAAAAATGAACATTTTTTTGTATTTAAAGAAAAATTTTAACGGTTTCAAGTTCAAGTAACTTGAGGCACTAGCCTAAATGACTTTTAAATACTAAAATAAAGTTTTTGATG
9169	6	74.6337	AATTCATTGAGGTGTCGTATCTTGTTCATTGTCATTGATATCGTAAGTATTAGATATTAATACACCTAGTATTACAGATAGATAGATTTTTTAAATAAAATAATCTTCTTTATCT
9216	4	71.5123	AATTCTGATCATCCAGTTCGGAGTTATTAGCATTTAAATAAAGACAAATCTAACCTTCACCAAACACTTTATTTTAGGAGATAAGGAAAAATGGTTCTAACAAAAAAAAATCCAA
9237	5	20.0431	AATTCTAAAAAAACTGTAAAATAGTTTGTTGCGCAGCGTGCGGTATATAGGTTCTCAATCAGAAATCGAGAGAAATAAGGTAGTAACTTTTTACTGGTAAGTAACTATACATATA
9336	5	122.794	AATTCTAATACTATTTTTATATTTATGTATTAGGGAGGGAATACCATCTTTTATCAGTTTAGGTAGACCCATCACATGATCAATTTGAACCTGATTTTGAATTTTTGAGGATTTA
9498	5	22.2753	AATTCAATGGCAATTAATTACGAAGGCGTATCTATTCTCACTCTGACATTGACCGACTTCGTTGAAAAGCAGGAAGTTTGAAAAAAATATAATACCCAGACACCAACAGCGTGGC
9504	1	56.0172	AATTCATAAATATAAAAACACTATTAGACTATTTTTATTGAATACGTTTGGACAGACAATTACTGGAAATATCTTACTTGCAAACCTCAGCTCTCAACATCTGCGTCATCTGAAC
9534	5	39.6279	AATTCTAGTTTCGAGCTTGCTTTCGAAACTGAAAACATGTTTCTGTAGCTGCTGTTGTAAACAGAACTAGTTGTAATTGAGTTCTTTTGGTGGGAGTTAGCCTTTAGACTCAATA
9564	6	50.7466	AATTCTCGGTTAAAGCTGAGTTGCTTACAATATACAGAGCGATCAACCATAATTGAAATACTTGGCGATAAAACATCGCTTTTTAAGAATAATTTGGTATTTTTTTAGTTTTCTT
9701	8	30.7052	AATTCGTGAATCTGTATACTCTGGTATAGTGTGTGATTTTTGACTAATAACAGAGAATTATTCAAAAATAAACTCGGATTTCAGTGAAGACCTGTGAAAACAAATAATTCAGCAT
9749	2	21.3885	AATTCGACAGACACAACTGTCCCTCTCAAGGTCTGTTAAACAATTTTTTATAAAAAATTTGGTTTATCAAAGTCGGTTTAATAATAAAATTGTTTAATTGTACGAAATATTTCAT
9796	2	33.2464	AATTCAAGGACCTTACCGAGGAAGAGCTGATAATTGGGTACAAGTTGATAAATTGGATGAAGAAGAGATATTAAACCGCGAATTAGTTGATTTTACGAGTGAAAAGAATGACACA
9799	7	98.6824	AATTCGTTATAAGACCGTGCGAGCCTGCTTCTTTCTCACTTCTATCGTTCACTCGTTTTTATTATTTCTTCGCGTACTACTAATGGTTATGTTGTCCATCTACCAACTGTCATCG
9805	3	47.3164	AATTCTTTGATATTATACATGGGAAGTTTTTTTAGAGTGTTACAAAGTGATATTTCATAAATATTAATAAAATATTTCAAATAAGTATCAGTGGCGAATATTTCAAATAAGTATC
9811	8	51.3729	AATTCACTGAGGCGACGTTTCTTGTTCACTGTCATTGATATCTTAATTATTAAATTATTAATACACCTAGTATTATGGTATTCTGATACATTGTCGATTTTTTGAATAAAACTAT
9840	10	10.0377	AATTCGGACAAGCAACAGAGCGGGAGGAGGAGGAGGAGGACAGGGAGGAGGAGTGGTTTTAAATCTCCAAACAGTCACTGTGGAGTCCAAGAAAAATTACCAGTGATTTTTCTTT
9855	4	12.6702	AATTCGTTCTTTCCAGCGGAAAATCTATGTCTAGAACGGTGGGCAGGATTTTGCTCCAGCTCTATGTTGGCTATAGACCATTTAAATGTACCATCAGGGACGCGCCGTCCATATG
9925	8	113.091	AATTCTCGTTGGACAGACTATAGAAACAATGTGTAATGATTTACAAATGGTCGTTATAATATCCACAACTTATTTTATCCCGTCTTCGCGTGAAAGAAAAAAATCCACGATATGA
9965	2	55.9069	AATTCCAGATTTTTCGCACCACTGATTCCCGACCTTTTTTCTTTTTCTTCTTCCCTGTTTATCCTCATTTTTTGCACCAGCCCGCGATAAATTTAAAATGAATTTATCTGCGATA
9967	8	118.73	AATTCCTAAAACTATTAGACATTGTATGTAATCACCATCATCATCGTTTTCAGACTATTCAACCCTTTCTAATTATTGTGTCCCTTAAATACTCTATGCATAGTATCAAATTGTA
9970	10	65.0756	AATTCTCTAATCGATTTTTTTCATCATAAGAATTAACCCTTTTAAATAGCCTGATTTTATGGGGAATATCTCGAGAATACAAGGAATTGAAGCTCAAATCAAAAAGCGATTTGTT
9991	2	4.44522	AATTCCTCGCATTTTTGTTCAAGTTCCTTCTTTTCGGAGAGAAGAACGAGTCCGTATTGGGCAGACTGGACTTTCTCGCTGCTGGCCTGGTCTAGTTCGCGAGTTAAACGTTCCA
10017	1	55.5244	AATTCTAGCATCGTAAAACTCTTATACTAAACCAGTAGGTATTAGTGCCTTAGGGTTCTAAATATTTTGTAATTATTTATTCGATACAGAAACACGTATGAGAGAATTTTGTATA
10093	1	48.5922	AATTCAGGCTGGAACTCTGTAACTAAATAGCGATCGGTAGCGATGAAGAATACTGACCTTGGCCATACAAACTAAACGGCAAGCGATAGTATTCTTCATCGCTACCGATCGCTAT
10132	5	89.293	AATTCGCTCGATTTTATCGATTAGGTATTATTGAAGGACTATTTGATGTGTTTTTTGTACTTTTAACAAATTTAGATAGTGTAGTGTTTGTAGTGTTTTATATGTTGTTCCATAA
10133	3	79.2897	AATTCAACATTTCAAGGAAATGTTACTTACCACTTATACGAAGAGCATGGCTATGGTCATTTGTTCATATATTTAGTACCTCACTTATTAAATAATGTCAAGTAAGATAAAATTT
10167	3	83.726	AATTCAAAAAATTTATAATATTTTGCCAGAAACGTATTGGGCAATGTTTCTATATCCCAATAAAACTTTTAAAGCCACTAAACATTTCAATATTGGTGAAATTGCTTTATATACA
10192	3	82.7456	AATTCAGATCGTTTTCTATGTGAAATTTGTTTGTAAAAAAATTGGTTTGCAATATGATACGTAATAAATATAATATATATACGTTTCTGGTGAGTTCAGTTCTTTAAAAAAGTGA
10194	11	70.6878	AATTCACCGTTGTTTCCTAGCCTCAATCTACTGAGGTGTTCATGGAGAAAACAGTGTTCTGTCCGAATGTTGTTCTTACTTCCTCCTCCTCCTAAGTGCCTTCTCTGTTGAGGTT
10213	5	134.001	AATTCTCAGCGTCTGGCAGAAAGTCTAACAAGAGATTTAGCTGGTAAGTACATAAAAAGTTCTAGTATTTAATTAAAAATCAACTTTACTTTTAGGTAATAATGCCATATCAAGA
10256	8	74.355	AATTCCTAAAGAAGCTAAACAAATTAGGCAAAGAAAATAAAGTGCTACTCTGGTTGCCAGCCCACCAAGGGTAGTGAAAAAGCAAACGATCTAGCTAGAAAAGGAGCGAACACTC
10288	5	35.6152	AATTCATTATAAAAATATAAATAATTATTATTAATATCAAAGAAACTCCCCTTGCTAATTGCATTTAATGGACATAAAGAGTCATTACTACTGCTTTCCTGTTCAAAATATTTTT
10345	8	7.81102	AATTCTTTGAAAAAATGTTTGGATTTTTTTAGTTTTAAGTTAAAAAACATAATTTCTTGATAATATGGTATGGTAATAGGTAGTAGATTAAATTTACATGAAAGAGAATCCAGAA
10374	4	86.2599	AATTCTCAACCAATATTAAATTGGGAGTCATTGAAGACCCAGCTAACAGATCAAGACTGGCAAAATTGCTGATGTTCTTGTCATCAAACAGCGAGGATGAACTAACTTCCCTGAG
10463	4	17.9744	AATTCTTCAAAGGCTGTATTCCGTTTCTTACCTTGGTTATGGATTTTTGACCCTTGGTACCTTGGTTATGGTTTAAAATTAACCAAGAAGTATTTAGGAAATATTTGGATGCTTG
10515	3	157.938	AATTCATTTAGACACTCACCAAGTTTGTAGGTCATTTACAATGATATGGTCGAGGATCGCGGCTTGGGACCGCGTAAACGAAGTAGGCCTTGTCCAGATTAGCCTTAGCGGCAAA
10652	11	34.7588	AATTCCGAAGAAAAGGCCAAGAAGGCCATGGTCGACGCTGCTCGTCTCGCCGACGAATTGCGCGCCGAACAAGACCACGCCCAGACCCAAGAGAAACTGCGCAAGGCTCTCGAAA
10688	11	1.4725	AATTCGAGGGTGAAAAGGGTGTCTTCTCCCCAGGGAATGTTAGCGTCCACGTAGATTTCATCGAGGCTCTCTGAAAGATGGGCAAACCTTTTTCTTCCTACTGACCTCAAGTTCA
10801	6	14.5603	AATTCGTGCTAGACAAAAAGCCCCAACCTCTATCCCAGAGCTAATTATTGCAGTATAAGAAGAATGGCTTAACATCCCGCAAGCAACAATATCAAACTTGATTGAATCTATACCA
10819	3	15.2698	AATTCGTTTGTCCAGACGATGCCTACAATGACTACCACAGAAACAGTGCCAAAATTAAGAGTATCATCCTATTCCAATCCTATTTCCAATTGACATTGAAAAACTATAACTAGTT
10850	5	45.7145	AATTCATAACAAGGCTAATTTGATTTGCACTTTCGTCTCAAGTGCTGTAAGGTGGAGACACCAATCGTTCTGCGGTCAACGCATAAAACACTTATTTTCTCTAATTCGGCCAGCG
10889	8	29.6354	AATTCTAGTATTTGAGATAGGGCAAATTTTTAAGTGAATATAAAATGAAAAAGGTATAATATTGAGATGCCCAAATTTGCTATGTTAAAATATGACCCAATGCAAAGCAGACGAT
10913	7	47.7989	AATTCCAAAATATAGTGAAAGAGCTCATTAATCATCGGTTCGAAAAGTCGACGGCGTCATCCTGTCCCCAACTATGCCGAAATCGACCCACATTTTTCTTCAATATCACATCCTT
10929	6	100.242	AATTCTTCAGCCTAGAAAACTATGTTTATTGCTATCCTATATGTATATATACAGTATGTGCCCGCATTATCGCTACAAGAAGAAGAACTTTATTATTAACAGCTTCATATAAGTT
10982	4	21.1039	AATTCCTTGTTTTCGTTTTTTCAAATTGAATTGTCCCTTCGCATCGTACTGAAATGTATTCTTGGAAGATTCTCCCTCGAAATGGACTGTTAAATGTAAACGATTTCTCGAACTG
11056	3	32.9333	AATTCAGTCTTTGATAGATGATTATTAATAATTTTGATTAACGTCATTTTTGTCGCTGTTAAAGTATTATAAAATATTTTCCTATAACTACTATCACCCTTTCAGTAGCATTAGA
11091	7	51.6507	AATTCCTATATCTGTCATAGAAATATTTTGTATAATTTTCTAGGACACATTTTTATAACGTTTACAATTTTTCGATTTATTATAAAGTTTTAAAAAAGTTGATTTTTTTTATTTA
11099	7	93.8293	AATTCTTTGAAAATGTATTGAATGTATTGAAGTCCCAAAAACTTAAATGCGTTTTTATGGTAATATAATTTCGATTTCGCTCTTTGATAGATCGTTATAATTAATTTTGATTAAG
11119	1	45.0908	AATTCGCATACCGATATATGAATGATCCTGGATACACATCACTGGTGCAAGGAGAAGTGATTTATATTATTAAATGTCAAAGTGTTGAAGTATTCATCAGAAAATCATCTCACTG
11133	5	134.001	AATTCCACCATTTATACTATAAATGAATTTCTGAAATCAATATTTCGGCAACTGCTCTAAGACCAAAACTAGACTGTTTAACCAGTCTACTTACTCTGGTTTAACCGCTCGTCGA
11158	1	17.7195	AATTCCTTGCTTTTCCATTGCAAAATTTCTGGTTAACTTTAAAACTAGCCAAGTATCAATTTTAGACGTAACATACATAAAAGCCAATCTTAATAAGAAAGCCAGTTGCAATATT
11163	7	33.2782	AATTCGCTCGCTATTATGTAGTTTTAGCAGAAAATACAGTTTCGGATTCAAATGACCTACTTTATTCACCAAATCACCAGCCAAGTTATGACCCCATGTAAAAGAAAATATAAAG
11167	8	50.6367	AATTCAATATGCTGGGAATAACCAAGAGGGACCATAAAAGAATAGAGGGGATACGATAAAAGACCCAGGAAATAGATGTCATCCACAGAGTTAAATCCCTCAAATGGCAAATAGG
11262	6	87.5528	AATTCCGAGAGAACAACAACAATCACAGTACATCTGTAAATTCCCATGTTTCAGTTTAAGTCTTGCAGTTGACGCGAGTTATTAAAATAAATCTCGCAAATATGTGCGAGAAGGC
11331	2	88.3262	AATTCCATTTTTCGACTGACTCGTCAATTTCAAAAATTCAGTTTAGGTACACAGCTTTAAACAAAGCGGTCTAAAACTTTGGTGTTAAGTTAACTAACGGTGACAGTTAGCAAGA
11343	1	111.357	AATTCTAACGGTTTTTAATATACGGATCTAGCAAGTATTCAACTTTGAGAATTGGCAACCCTGGAAATAAGTGCAAGTATTTTAACTTGTAATATATTTCGACCCCAGAAATTAA
11357	8	59.6162	AATTCGTGACAAGGTTCAAACATAAAACGCTCATTTTCTCTAAGTCGGCCAGCGAAGGCATATCAAAGACGGTGTGGATCTGAAAGCGACAGTGTTGCCATATTAAAATGTGTAA
11367	9	29.0691	AATTCATAATAGCACTAGTGCTATTATGAAAGTCATAATGACATCCAAATGATAATGTTAAATGTGTCATAATGACATTGTCGTAGATTGAAAGTAATAATACCTTGATATATAC
11453	8	71.41	AATTCTGATCAGCTCAAAACAATACGAGGGTTGTCTTTTATATTTTGCATATAGAAAAATAGTAGGCGCATGTCAACATATAACAAATGTCAAAACTGTCATCTCTAGTTAACGC
11477	2	25.513	AATTCAACGCAGTAGTTTTAGGTTAGGTTAAAAAATAAACCCGCTAGAAAGGTATAGATATTATTTAAACAAAGATCGTTTTATATCAAAAGTGGTAAGAATTTTAACGTACACA
11551	8	180.531	AATTCAATCCAGCATTCAGCTCTTGAATGGCTTCTTTCAGTTCAACGTCTTCAAGGGCCTTCCACAAGTCATTGTCGCTGTATTCATCAAAAGGATCGAGATTCTTGCGCATGGT
11599	4	44.9981	AATTCGGTAATAGTCGTCGTCGCAACATTGTTACGTTAACTAATACAGATGACTCTGAAGTTTTTTCCCCCATTTTTTGTTCCTTCGCCAGTCTTTTTGTCTTTCCATTTCCCGT
11634	10	68.6256	AATTCTGAGAACCTTCTATTAAAAACTATATTTTTTCGAATTAGGCATGATCAATAAGAATGGATAATGTAAATTTATAACTCCAGTCGTGTCCGCCCCGAATAGCAGAATAACT
11688	5	200.833	AATTCTTTGAAAAATATTTTGGATTTTTTTTAGTTTTTAATTAAAACCCTGATAACATGGCAACATAGGTAGTAGATTACATTTACAAGAAAGAAAACCCAGAAAATATCCAGTG
11702	8	38.887	AATTCCCAACTGGCATAGGACTACGACAGGGAGACGCGATAACCCCAAAACTGTTTAGAGAAACACCAGAAGGAATCTTCATCAACTGGATCGGACTAACAAAGGATTAAAAATA
11777	2	33.2466	AATTCAACACTCGCAGATTTTGTACATTTAAAAAACGTGTAAAGTGTGACGAGATGATATTAACGAGTACGGGGTGTGATTATGTATACAGGGTCGGCAGAAAAGGCTGCATCAA
11955	8	1.47144	AATTCTGGCTTTCGCTCACCACACCCTCTATTGGGAAATTTAGCAACTCTGATTCCCCTGTATCCATAGGAACGTCAACATCTCCATCTTTGTTTGATCCAAGAAGGTTTTCATC
11968	3	72.4616	AATTCGTCATTTCGCTTATACAAAAATCGAAGTATTCTAACCTTTGAACACAAATATCTTGAGAGGACCGTTCAATATATCGAACCAAAGAATATCTTAATAACCTAGAAGTCTC
12000	5	18.9221	AATTCTTTTATTCGTTTCTTCGCGGGAAAGAAGTGCGTCAGGCGACTAAGAAGACAGCAAAGTATCAGTCACCTCTACATTAAAAATAGCTAATAGCTACTATTCTTGTAAAATA
12039	1	45.0927	AATTCCTAAATAGGTACCTATCTACTTAAGTGTTTTGTACCTAGTAATTATAGGTTTTGGAAACAGAATTTCGGGAAAAGCTCGGAAAAAACTGCGAGACTCGATTTCTGAGCTA
12077	5	132.773	AATTCATTTTATTATTTGAAACATAATGTAACAATATTATAAAACAAATCATATATTATTTAAAAAATGCTGTTTAAAACAAATTTACTATTCACAGAAAAAATAAATTTCAATA
12091	9	29.069	AATTCAAACTCGTAAACAAATATGCCTAACGAATCGAGAAAAGATGCACTTTTATGAAAAAGTAGTTTTTAAATATCTTACATTGTTAAAACTGTTTCACAAGGTGTTTCAAACT
12201	3	30.9103	AATTCTCAATTTGGGTTTCAAAAAAGTGTTTATATATCATAATTAGTAGACCATCTTCAAATTTAAGTCTAGCTCGGCCGTTGTAAACATGTATATATAACATTTTTTGGAAAAG
12204	7	33.2781	AATTCTGGGAGGAAGCTGTTTTGACGGCGGCTTATTTTACTAACAGGACACAGTCCTATAGAGTGAAAGAGAAAACTCCTTTGAGTTATAGTTGGGTAGAAAACCGAATGCCAGT
12218	7	48.8396	AATTCTAATTTGTTTTTACATTAAAATGAACGCGGTATAAGATTTAGCGAAAATATTACGAGTTAGAAGATACACTTGCAGTTGAAGAGATTAATGCAGAAGATAAATTTTTTAA
12325	5	143.862	AATTCACGCGGACTGCTCCCGAGGCAACACAAAAACGGTAACCGTCACGTGTTTATAAATAAACGTGCAGCCAGCGGGCGTAAAGTTAAACAAACTGAGAAATGGAATGAATATT
12326	2	64.5017	AATTCTAGTTCCTTATTAGTTCTAGTTCCTCCAGAGGAATAGTTCCTTGAACTAGGTCTTTAGTTCGCGATAGTTCCCGACTTACATTGACATCCCCGTTTCTTGCTAATAGGCT
12351	1	43.5892	AATTCTATTTCGCGCATGCGCAAACCCTAATTTAAGTCTTGCATTGATAAATTTTATTGTTGGTTATGGAATGGATAATGGATGGCATTTGTTGATGTTTTATGGCGATTTGTAT
12368	5	118.179	AATTCTAAAATACATAACAATCTAAAAACATGCAAACAACATTTAATTTCTAATAAAATATATGTGCATATAGGTACATTATTGATTATCAGTTAAGGAATCGATTTACTGTAAT
12370	1	88.9483	AATTCGTCGTGACAAAAAGGCCAGGGAAGATTTCGACAGCCGATATCTCAGAAAATACAATTTACCTATGAATTATAATGACAGATAAAACTGACGCTATCATGTATTCTCGTTG
12384	5	22.2754	AATTCTGCGAAATTACCTTGACAAAACATTTGGGACACTCTTTGCCAGAAATTTGTTCGCTAAGTGATGTAGTGAGTGAGCTGAGTAAGGTTTTCGAAAGTGAGAAAGTCAACGT
12446	8	110.271	AATTCCACTCTAGAAACATCGTGGTTGGACAACACTGTGTAACACCATGGTGTCCAAGCCAAGTGCTTTGATAACCATAGGCGATTTACGAAATATAGGTACCGTTTCGCATTGA
12466	7	62.2481	AATTCGCCCTGAAATGAGTATGAACAGCCAACCCTAAATAGTTGAATTTATTTCTTGTTAGAGCTACGACCTCTATTATTGACATTTTCTTATTACAAAAAATTGCTAGATAGGA
12485	4	41.1442	AATTCTCTAATTGAAACGCATATAACAAATTATAGTTTGAATAACGTTTTGATAATCATTTGATAATATTATGATTGGCGCTATGACAACGACAATATTTTTTTGAGAATTTGAT
12492	3	40.3901	AATTCGGAGGTAATACCCTATTTTTATCCTTGCTTACTGGCCGAACTGGCCTATAAGTGTACTAACCCGAAAGCAAAGACATGCTTTAATGCATAAATTGCTGTAAATCGTTACT
12497	8	184.201	AATTCTTCAAATTGTCTCTCATTATTTCAGGAATACAGAGTGCCGTGCAATTGATTTGTAATTAAAAAATATACTTTTTTTCAAACGTCACAAAAGTATTTATTTTTGAGACGTG
12513	1	63.8955	AATTCTTCATGTAAAATTTTTTCAATTGGGGCCTTTGAAATGCCCAATAATGCTTTAATTTCACGATAATATGATTACGACTGATGTGGTGCTTCATCGTCGAAAATAGAAACCA
12523	1	97.6791	AATTCCGTATTTGGGGTTCTTCTCGCAGAAACCTGGCAACATTTCATAATAAACCAAATCTTTGACACCAGGTGGTTTATGTTCTGGATTGAACGGTTTCAATTGGAACCCGTAC
12568	5	141.936	AATTCATCTTCATACATTTCGGAATATCTAAATATTTTCCAATTTTAGCCAACAAATCTGCCTCTGTATTTCCCAAGATATTGGAATGACCTGGAATCCAGGCAATCCTTATGTC
12573	5	23.8456	AATTCAAAGCAATCAAAACATGCTCTTCGAGTTGTGAACAGCTGCCTATTAAAAGCTATGCGTATGGCATAATTGTTATTAGTATTTTATTTTACTCTGTAATCAATAGGTATCT
12614	1	63.1667	AATTCTACTGCGACCTTTTCAGATCTATTGCCATCTCCTTAACTCTGTATTACATTGTCCATTCCCCGTATGATTTTTATTACTCTTACTATTTTTCACTCGGTAGTTTTATATA
12734	2	36.1367	AATTCGAAGGTGGTTTGAGATTGTGATATATTTTTTAACGTTTTGTATTCGTCTTGATCGTTCTTAGAATCCGCAGAGGAAAGATGAAACGTTAAAGTCATATCGTTATCATCAA
12837	2	36.1368	AATTCCTTTGAAAGGCTAGATGAAAAACGACTGACTGAATTGTTATAGACTCTCTTCAACAAAATTAATACATTGTATAAATAGAAAATACTAGTGAATACCACTATAATTGCTT
12848	9	42.7167	AATTCAATTACCTCGGCAGTTTAATTTCGGAAAAGGGCAATATCGACTCTGAAATTTAGCAGAGGATGAGCAGCGCCTAAAAAGCATTCTGGAAATTAAAATACAGGGTTTTCTA
12899	1	45.5882	AATTCATATTATTTATGGATAAATTATTCGACAGCATCGATGGATCTAGGCTTAATGTAATACATGGCAAGGAGTTTAAGTGTGCGGTTACTACAAAAACGGAACAGAAAGAAAG
12949	8	182.98	AATTCTAAGGATGCCACGGAGGTGGGATTTTTTTACTGCACAAACTCGTGTTCCTCACTATTTTCCAAAATTTAGTCTTTTTCTAAATATCAATTTTAATTTTTAGGTTGTGGCT
12998	5	110.277	AATTCAGGGTGCATCCACACCATCCTAGAAAAAGCGGAACGGCGCGGCGTATCGCCGTAACAACCTTGTATCGACTTCCAACAATTCTATCGGCTGAACTTTTTGACAGATGAAT
13050	1	1.4621	AATTCTGCTGAATTTCACATAGTAAACTTAATAATAAGTTTACTATGTGAAAGTGAAGTGAAGTTAAGTAAAAGCATTCAAGTAGCATTTTGGACACATTTTAGGTAATGTTTCT
13125	5	19.2022	AATTCTGACAAGATAAACTTGAGACAAATAATTGTCCACACCGAAAGGACAAAAATATAACAACAAAGTCAACAGTTTAGTTGTTGCGAATGAGTTTTATTAACTATGTGTCATT
13160	1	55.5242	AATTCCAAACTCAGTCGTCAGCCACTGATGCATCAGCAACTTTATAAATGTCTAAATCAATTCTGAGGAGATACCATCATCGGACTTTTAACCTGAAGTTCAATACACAAATGCC
13166	7	19.2377	AATTCTACTAATAATGGCTAATTTAAATTTTCCGCCAGCCAGAATGTGCCATAATGTCTTACGATACGTTTTATGCCTATCTCTTTCTTTTTCATATAAAGCACACATAATAAAG
13184	3	46.8353	AATTCATTACTATAACTCATTATAAAAATAAAATTATACAAAAATAAACTCAAAATAGTGTTGGTTAGGTTAAAAATAAAAAATATAAAATATTAACGGTCCAACTCTTGATACG
13229	8	92.7872	AATTCTTGATACAAAAGGGTAATAAATAAATCGTCATAGTAAGGAAAAAAGAAAGGTCCAAGAAATACTTTTAATTGAAAAAACAAATCTATTATTATTGATAATGTGTCTTGCT
13358	3	150.039	AATTCAATGACTGGTAGTCACAAAGTGACATCTGTCAAAACGAATGCTTATTTGAAGTATCGCAGGAGAAGGAGCAAAGTCTACGCTAGGTTGAAACAGTTTAAGGAAGCGTTGG
13401	11	0.501388	AATTCTGTAGAATCTTTATTTGTTCCATTATTAACTTGATGGGGAGTACCTAATAAATCTATAGAATGGTATAAAAATTTACTAGGACACTTACATTTTCAGAACTGCAATCAGT
13403	4	21.1072	AATTCTGGTTCCTTGGGAATAACTAGTTCCTTAGTTCTAGTTCCTCCAGAGGAATAGTTCCTGGGACTAGATCTTTAGTTCACAATAGTTCCCGACTAACATTAACATCCCCGTT
13406	1	63.8953	AATTCAAGCCGAACTAGAGAAAATGAGTGTTTTATGCGTTGGCCGCAGAGCGAGTAGTGGCGTACTTGAGACGCAAGGGGAAATCAAATCAGCCTTGTCACGAGGCTGATTTGAT
13424	8	102.431	AATTCTGTGAACAGTACTAATGGTCAGTGCACGTTGTTGCACGAATGTAAAGTTATCCAAAGTTATTTGACGGATTTTGCAACATACAAACAACATTTTTGTGAAATTAAAGGGT
13440	3	21.7099	AATTCTTAAAGTTGGGAAAGTGATAAAGTGGGAAGTGTCTATTCCGAAAGCAATATCATGATACATGTCGATTCAAACACTGATATAGTCGAGGAATGGGGAAAGTAGTGTATCG
13467	3	77.3365	AATTCTTTATCAATGTGTGTACCTACCACTTATTAATTATTAATCAAAACAAATTCAATTTCACAATATTACAGTTTTTATTCAAAGTTAATGTTTCGGCGTTTTTACTTTGTTT
13528	3	69.0761	AATTCACTTTGATAAATTTTACACATGTTATGCATATTTCTGATATTCACATAGTACGTTTTTTTTAATATAAAGAGTCCCTAGATTTTGGTACCAAGATCGCCAGACTTTATGC
13552	11	58.887	AATTCACATTAGGTAACATAATACAGTTCTTTTTATTTCCAAACTATATTTATAGCAGCATATTGCTTTTTGACGTTTCATCAAACTAATTAGAATAATTCAATTAACAATTATT
13560	9	17.6029	AATTCTGTACCACCCAGTATATTACCACCTTATTACGTTTTATATTCCTCGACAGATAGTTTAAATAAGCCTCTACATAAAACACAAAACAATTTGACCAAGAAGGTTACATATA
13589	5	182.463	AATTCTTAAAAGCCAAGCTTTGAGCATGCGCGATTCAGTTTTGAATTAGCATTAGCCCTAAGAATATAAAATATCCCAACCTGTTAGGACTAAGGCTAATGTTAGGACCGATACA
13608	2	79.5924	AATTCAGAGTTATTTTAATAGACCTTGTTAAGAATTTACAATAATTATTCCTATATTTAAATAAAGGGTGGGTCTTAAATAAGCGCATATACGGGGTATCCCAATATCCCTCGGG
13702	6	50.7465	AATTCCCACCGCTATTGTCAGAATTTCGACCTGTTTCACGTTAAATCCTTTTTTTCGACTATTTTTACCGATCCGCAGAATCTCAGACCCGTTTAATTCACTCCCGCCCGTGTTT
13720	3	1.1548	AATTCGATAATTATTTTTCTGATATTATAATTACTTGGTATGTGCATGTGTTATACGTCAATACTAGTTTTGTACCTTTTGTTAACATTTTAATATGTTTTTTTCGTAATTAATT
13783	3	52.6182	AATTCACAACTTACATCCACGAGTGCATCGAAAACGAAAAAAATTACAAGATAGATATGGGTACCTTCAAACAATGTCGATTTATAGAGGGAATAATTTTCAAATATTCTTTTAT
13855	2	9.78881	AATTCTCTCTTTAATACACAATGAAAATAATACACAAAAATACTGACAAAGGAGTACAACAGGGTCCCGCATAGCCAACAATAGACAACAATGGACCCAACTCCAAAAAGAGTAT
14073	2	3.89038	AATTCTCTTGATAATTTATGGTTAAAAGCGAAAAGTTTTAGAAGAAAAGTCAGTGGAAGACTTATGTTCATATAATACTTTAGTGTTTTTGGCATACTTAGTAGAAAAGAGTAGT
14096	3	71.3182	AATTCACGAACACTATAAATATGTCGTAATAACGTAAGTTAAGTACAATCATTTTTAAAATTCATTGTGTGTTTTTATAGTTAGACGTAGATAAAATATTGTACAATACACGCGA
14107	4	15.4574	AATTCAAAGAAAAAACTATAATATAAATATAATAAATTTGTTCCTTGAATCTTAGCACGTGAATTTAACCGTCTAATTTAACTTTAAATTATCTAAAGAGAATATGATAACGGAG
14113	1	30.6898	AATTCATCCAAAAAGCCGAAAGGTACGAAATTCTTGGTGAACTCTTCAAGTTGGTCGTTCCGATGTACGAAAAAAAGCGAAACTACGAGCAGCTGAAAAAATGTTATCAGAACTT
14121	3	62.6904	AATTCAGTTCTCTTTCTTGTATTTGTACCTAATACAAAAATGTCTATATACAGACCCTGTAGTCGTTATGCTGGGTCCAGACCAAGTAGACAAAACAGTGACAAGACAGAAACCT
14150	3	181.741	AATTCCCAAAAATCAAAACGCGTTTCTATGGTAATATAATTTTTAGATTTTCATTCTTTGATAGATGATTATTATTAATTTTGTTTGACGTCATATTTTTCGCTCTTTTGATATG
14162	8	155.726	AATTCAAGTCAGTCATATTGTTTGCCTTAGAAATCTTATCAAGTTTATTTATTAATTTATAGTATATTCTTTTTCCTTAGTATTTTTATTCAGAGATAAATATTAATTAATATGA
14171	5	227.537	AATTCTTTTTTCTGCTAGCTCTATCTCTTTCTGACTCTCCCACTTACATTTTATACTCTATATTCTCTCTTGCTATTTTAGGAAAAACTGCCGCCGTTTATAGCAACGAAGAATT
14263	5	109.846	AATTCTTTAGAAAAATCTAGAAACAACCGCCAGGGGGTATATAAGGCCCGCGCTTTGACAGTCTGAAGTTTGATAATACCGCGAAATACCGTTAGAGTAATAGTAGTTGCATAAG
14326	9	0.0002	AATTCTAACATGAATATAATAAACCTACTTATAAAAAAATCGGTGAGACAGAGTTATGACCACGGACTAAACGCACAATTTTTCTAATTGCGCACTATTTGACACTATACCGATT
14333	6	35.5159	AATTCATCTTGATTACAATTTTATTGAAAAATCGCTTTTTATTCAAAATCTGAGTCAGATAGGTATAGGAAACCCTAATATAGTTTGAAAGAGCATTTAAATCTGCTTTGACTTA
14364	4	34.3694	AATTCTTAAATGTAATGCGGGGTCGGGTAGCACATCATTTGAAAGGTTATTAAAGCCTCATTTCAGCGCCCTCTCATTTTTGGAGTTTTTGCCACATTTGGTGGAATCGGGCTGA
14480	8	42.4531	AATTCGTACTAAATAGGATGTTTTTGTTTCCACCTTTCAATAAAAAGATTAAGTTTTAGTCCGAACGTCGCGTACGACGTGTAATGGCTCTGGTTCTGTCTCTAAGGACGTGACG
14568	5	114.154	AATTCTAGGTTACAATTTCCAGTTCTATCCTTTTCAAAAATCCTAAAAATATGTAAACTGAACCCTTCATATAGCTCTTTGTCAATGACTTTTCATTATCTAATACAAAGAGCTG
14583	3	41.1288	AATTCAAAATGAAATTATTTCTCCTGATGCCACTGATGACTGCTCCAACACTGATTAAAATTATTATAGACCAAGCAAATAACACGATATTGTATTAACATAAAACTTATACAGA
14584	5	95.2901	AATTCGCAATCATCACGATTTAAACAAGTAGTCTTTAGAAAAAAAAATAGAAAAGTCGCATCTGTCAATAATTAAGCATTTTTAATTTGTGCTATTTAGTAATTTTACCTTACAA
14587	6	98.264	AATTCAGTACCTACTTATCGAAGAATGAGAAAAAATTAAAACGAAACCAGTCATTAGAACGATTGCTGTACTATGATACAAATCGCCATTCGATTTTAACTGTGTATAGGAACAA
14613	3	30.9104	AATTCTTTATTATACCTAGTATTTTTGCATAGGATATATGTAATATTAAATTAATAACAAGTACATCTGTTTAATAAAAAAAAAACAATATTATTGACCTTAATCTGTAACAAAA
14689	3	163.242	AATTCTCAAAGTTTTCTCTTCAATATTCAAGTATGTAGTGCTGGCTGAGGCACGCCGCTGACTCAGGAGAAGGATCGATACGGCCACCGAGTGGGGGTTTAAGATTATTATTTGT
14710	9	46.752	AATTCTTTAAGGAGACTAGAAGCATCTAATCGGGTTTTAGGCTTTTCGGTATCGACTTCAGAAATTGACTCCAACGTGGATTTTATTTCATTGGAAGACAAAGATAGTGATTGGC
14788	3	46.8352	AATTCTTCAGCAGTTCCTCGTGGTTTATGTTGACTAGATAAAGTTCTGAACCAGTAAAATGCCACAAACAGAAACCTCTCTTTGTGGATTCTATGATCAAGTGTATCATATAACA
14836	7	79.155	AATTCCTTCATCAAATAAAAAACATGAAGCCCAAATAAGAATGCATGTCAACTGAAAGTGACATAAAAATGATTATACAGGGTGAGTCTTAAATAGGTGCAAATATTTTCAGGGG
14862	5	103.477	AATTCAAAGTAAGTGTCTTGTTTTTCAAATTAATATTTTTTTAGAAAATATGCGATAATTGTGTTTTGAGTGTTGAATAGTATAGTTATTATAACTCTCTTTTTCTTTCAATACA
14888	8	88.9008	AATTCGGGCCCTGTTGATTGGTGCCCGCGCACGGATGCAACTCATTGTGAGTCAGTTTCAATCAGTTGGTGTAGTATTCAATTTAAATAAGTTATTATGTCAAATTTCGAATATT
14912	9	46.1096	AATTCTATAAATAATTTGAATAAATAATAGCCAACAGTAAAGCTAACGTTAGGACACTGGCAAATACTGATAAAGCCAAGTTGAATCAATAATATTAGAATATGTAATGGGAGAA
14975	3	171.993	AATTCTCTTCATTTTTTGTTCTATAAATTTTTTTATTTAGCCAGAAAAAAAGAGTCCAAATTTTTTTTCAGTTTCTCTAAAACACTACCTTCAGCACACCTAAAGAAATCTCAAA
15047	7	110.381	AATTCTAATGCGACATTCTTTTTTGGTCATGACTACCACTTTTTTCGAAAATATTACTGAAGGAAATTTTTGGTCCATCCATCCTAAAAATATCGAATTTTTTAATTCCTACTGC
15076	10	0.996773	AATTCCACGGCCATTCCGACTTATGAAATACGATAACTCGCGTCTGCCCCGCCTGCAGATCTCTCTCTTTCCTCTCTCTCGCTCCCACACATCTCCTTATAGCTCCTTCTCACTC
15115	1	38.463	AATTCTGAATAGTGCCCATAGGCTAAACAGAATCATATAAAGTCATACAGGAAGGGTTATAATACTGCTATACATGTCCGTAAAATAAAGTATACTTCTTAAACTCAAACGGTAA
15200	7	48.28	AATTCACAAAATCATAGGTAGAGATCTTAAGGTATATTGGCATTTGCCTGCATTGTTCAGTTTCAATTTAAAAATAGTTACAGTTTTTCTGAAATTAGTTAAAATCGGCTTGTCC
15232	5	110.708	AATTCTCGGCGCCATCAGAGAAGAATATAACCAGAAAAGAAGAGGAATAAAGGGAGAAGTACCAGAAACTCCTGGAGCAAATACGCAGAATGTACGATGATCATCGGTGGTACTA
15257	4	32.9059	AATTCATTGAGTCATCGTTTTATAATGTCTTGTAATAATAGAATTTCCAAGAGCAGGTATTTCTTTGGAGCAAAATTGGGTAATATTTTTTAGTCGATTCTTCGAAGCGATTCTT
15273	10	77.2527	AATTCGGTAATAGATATATCTCTATAAAAATAGGCATAACCCGAGTCGAACGAGATTATTTTGTTGATTTAGTGAAAAATAAAAGCAATATAATGCGATACTGAATCGACAGAAA
15386	5	91.8534	AATTCTGCTGTAATGGTAAATCTGCCGTCAGAGAGATGCACTTAAATTTATTTGCTGTTTCATTTGTACGGTCTCGGATAGTTGACGTTTTCTTTTTTGTTCTAAGCATTTATTG
15447	4	7.36645	AATTCTTCAAATACATATTTATTTACCTTTTATCACAGGTAAATCTGTTTCAAGATTCAAGGTTAAACAAATGTTTTATAAATACCATGATTATACAGATTATGTAACAATCATG
15539	1	83.0678	AATTCTTTTACAAGACTAACTTGAGACCAATTGTCCAGACCGCAAGGACAAAGGTACAACAAAGTCAAATGTTTAGTTGTTACGAATGAGTTTTATTAACCATGTGTAATTTCAC
15589	5	133.245	AATTCACAACAGACCTCATAAACAAAGACAGAAAGACAGTCAAAGGGCATTGTAAGCTGATAGGACTGGCGGACTAGGTAAGCCATATGCAGGTTCTGGCAACCTAAAGAAGAAA
15619	9	46.1095	AATTCGCTCTACTAAAATATCCTGATACGAAAAGTCCTGACTATTCTTTTCCCAGCAGTTGCTCTGGGGAAATAGTTGAAATAAAAATGATTCCAGTTGGCTTGGAAATGACGAC
15655	8	125.064	AATTCGTCCTTATTCCTCAGCTTCAGCCTACTAAGGTGTTCGTTGAGGAGACAGTGTCCTGTTAGAAACCCCGTGACAATCCGAAGACTGTTTTTACTTAAATCAAGAAAAATCT
15723	5	130.506	AATTCTTCTTGAGAGGCGGGTATATATTTTTTTCTTATTCTTTTGTAGCATATGCGCATCTAATTTACATCCCTAGAGAAATTTCAGCAGAGGAATAACAATGGCCTGCTTTCAG
15730	9	73.7668	AATTCGGAAACGCAGGAACAATCGTAAATCACACCGTGTGTACTTCTGTTAATTATTACAGCAAATTGACAGCGTGGTCAACAGAAAACTAATGTAGGAGATGATTTAGGATGGT
15741	5	26.9859	AATTCTCTTGTAATCTAATCTCCATTCTTGAATATGTTACCCAACATCAAAACTGACATCAAATGCTTTACAAATTGAATTTGCACGCGGTAGAAAGTCAAGCTCCCCTTTCAAA
15783	3	52.6183	AATTCTTATGTTCTTAATGCCTTAGCAATTTATAAAGATATTCTTATACCAACAAAATAAACTTTAATGTAACATAGAACTGTCGAATATATTAGACATGAGGACCAAACCAACC
15802	8	175.459	AATTCTACGTGTTACTTATGTAACCCTGTGTCGTTGCTGTGTCGTGTACGCTTTTTGGCCGATGCCCAACAAGTTCTATTTCTGTTCAGAGTCCAACCGCACGCTGGCTTTCGGC
15803	5	128.909	AATTCCGAGGTTTGTATGCCATAAAGGCTTACAGCACTCCACTAAAGTTACCTGTTTAACGGTTTTAGTTAGATTTTAGGTAAAACTTAATTAAAGATTTCTTTTTCGTCACTTT
15804	9	10.7759	AATTCGAGATATTATTTGACGTCGTAGCCTCAGGTTGTCTTCCGCATGATGGCGCTCCGTCAATATTTCTCTCAAAAGGCAAATATACGAGCACTCGTCGATTTGCTTGCTGTGA
15837	8	151.239	AATTCGTTTTTGTGAGCCCCCAGTAGGGGGCTCAGGTGTTTCAGCGCTGCTGACGTCTTGTTATCTCTGTCTGTACTCCCTTCACTCCTCCTACGTCTTTATTTGATGGGAATTT
15901	6	44.2998	AATTCCGCACCTGTCTTTTCGTGTATCTCGTTTGTGGTTCCCACGCATATAAAACGGTGGTACTACTATATACTGCGAGAGCCAAATGGTACGAAGCAGTACGCGATTTCTTAAT
15937	7	55.9812	AATTCATCATAGCACTAGTGCTATTGTGAAAGCCATAATGACATCCAAATGGCAATGTTAAATGTGTCATTATGACATTGTCGTAGATTAAAGATATAATAACTATAAAATAATA
15959	5	103.477	AATTCAAAAGAACTAATACTACTAATCCGCATAGCAAGAATTTATAATCTAATAAAATATAAACATTTCTTAATTTCTTTAAATTTTGTTAAAGTTTGTGCGAGGGGTATCTCAC
15970	5	98.6591	AATTCAGGTGTTTCTCCATCGATAAATAAAGCAAAGGCGTACCGATTGGCTGAAATCTCAAGTTACAAACCGATCGATGTGGGACTCGGTTCGAATTATAAATAAATATAAAGTG
16021	5	19.7631	AATTCATTCGGAGAGAGATTCCTATCGAAAATCAACGGTATAAATCGCATCTGATTCGCTCGACACGATCGTTTCCCTAACCGAGCAAAGGTAAAGGTTAAAAATAAGCCGTGCA
16088	1	37.3927	AATTCATGGTAGGCTTTGGAAAAAAGATGTTTTTAAAGGAATAGTTTAAGCATCAAAATATTATTATATCAATATTATAATAGTCACAGCAGCGTTTTTATATCTTTTGATTGCT
16101	2	36.1369	AATTCATAATAGCACTAGTGCAAGATTAGACGATCAAATCTATTTTTCCAAGACTCTTTGATTAAAAATTAGTGTTTTTAGCACAACCATGACAGTTTAGATTGAAATTTTAAAC
16102	3	83.7259	AATTCAAAGTGTCTGGTTTTTCAAATTAATATTTTTTTAAACATGCGATAATTGTTTTGAGTAGTTTATTTAACTTTTCCTTCTTAATTTTTTACTTCTCAATACTTTGTCTTTA
16199	7	19.2378	AATTCTTCTTCCAGCCCTAAATATTTACTTAAGTTGAAGTGTATCGAGCGCACGAGGGAGATATAAATTTGGCCATTTATCTTAGCCACCGTTTACGCCCGAAAAGCTGGCGTTT
16223	8	20.206	AATTCCACGTAGAATCCAAAAATCAATCGAAAAATATAGAGAGGGGGGGAATATACAATTACCAGAAAGTGGAAAGGGGGATATACAATTACCAGAAAGTTGAAATAAGTAAAAT
16232	9	21.5686	AATTCACGGGGACAGAGATAAGGATATCTATGGAAAAGTAACCACAAGAGGAATTGTTACATCATTTAAAAAATGTTGGGAAGTTGATTGTTTCCCATCGAAAAGTAGAAAATGC
16294	5	136.627	AATTCAAGTGTTCAGCAGACATGGAGAATTTCTTTTTACCTTTGGATCGGAAGGTGAGAACCAAGAATTTCTTCTCTTTTTTGTTTTAAAATTTATTTAGAACGAAGCCCGAAAG
16301	8	96.256	AATTCTATGACAGCTGCGGCCATTATTATATGACATTTGGACAATTTTTTTTGGCATATTTAGATAGCCACATATCTTCTCTTTATGGCACAGTGGCTGTGGCAATCACTAATTT
16319	2	64.5018	AATTCTACAGCCCTCATACCACCCCGTACAATAAACACGTCGTCTTTGTGAATGGGCCTGTAGGCCTCCAAGAAGTATGGCTTTAAGTACACTTCAAAAAGATTCCTGTAAAAAA
16322	7	34.2402	AATTCACCGACATTTTTAATACTGGAGCTGGTCCTAATATAACCACCAATGCCACTATAAAAGTAAAACAGTTTTATGAGTCTTGCATGAACACTGAACTAATTTTAGAGAGAGG
16342	5	44.2532	AATTCAAAAAACCGATTCAGTTAACCAAACCAAACCAAAACAAAACTCTCACTGTCATGGATAGGTAGGCTATAGGCATTTTGCAAATGCTTTATCATCCCCAATTAGAATAAAA
16351	6	64.8635	AATTCTAAATTCCAAAAAAAGCGATTTAAATCCAGGTAATTTCTGTGATACATATACAGGGTGAGTCTTAACTAACTGCAAATATTTTTAGGGGTAGTATATTTCGACCCCAGAA
16376	7	22.0677	AATTCTTTTCGGGTCTATAGTGATTCTTTGACTACACACACTTAAAACGTATAAAACAATTAATGGAATAATGCACTTAACGAACATTTCGAACTATTTTTTTGACGGACATGTA
16434	5	72.9864	AATTCGGTCGGTCGACTGAATTATTCAGGGCAGCTTTCTGTTTCGAGACTCTCCCTGACGTCACACCGCTCTATCTTTATTAATTTTCTGGGTTTGTTTTTGTTCTGGTTCTTAT
16440	5	70.7634	AATTCAGCTGAACCGACCCTTCAGAACTTGAATCGTTACTAATAACTTTGGTGTTGCCTGAAGAGTCAGTTTCGGTTACTAGACTCTTCGTCGATCTTTCTTCTATTTTCATTTC
16635	8	26.5418	AATTCAAATAAATAATATCCAGGTCAGCAATTTAAAGATATTATTTTTAACTTTTTTATGGTGAATTTGAAATCTGAGCATAATACCATAAATCAAATTCTACAAACTAGTTTCT
16644	5	12.5592	AATTCTGTTTGCAGTGGTCAACTATCTTGAATGTGCCATTTTCCCTGGGTTTTTCTTAGCTAAGTTAACGGAACATCTTCCGCTTTTTATAGCTTCACAAATGTGTAATAAATAG
16663	10	60.2522	AATTCATAATAGCACTAGTGCTATTATGATAGCCATAATGACATCCAAATTGCAATGTTAAATGTGTCATAATGACATTGTCGTAGATTAAGTATTCTAATATAATTGGTGAATG
16689	6	15.5233	AATTCATATGGTAGTAAAATGAGGGGTAAAACCGATATCGTAAACCTTGAACGAAAGGTCAGGAACATGCTCATAAACGGGAGTCAGAAACAAAGAAAAGGAGACCTGTAAAATA
16727	9	43.8771	AATTCAGATAATCGAATTATGGTGGCTTGGTGCATTTCAGTTGATTTCAACAAACTCCGATCGCAGAGATTCAACGGAAAAAATCTGAAATTATCAATATATAGTCCACGCCCCG
16731	5	165.682	AATTCTCTATCATATACGCCACGAGACTTTTCTGGCAGTATTTGTGCTGTAGCCGCCTCTGTCTGGTTACCATTTTTCTTTAAAATCTGACTTGCTGGTTGATAATCCACTATTT
16737	5	19.4826	AATTCAAATATCGTTTCAAGGTAAGTACCGTATGATCGAAAAAGAAACGGCGTCCAGTTGGTTTGGAAAAGCACATCGATGGCATTCCTCATATAATTTTACATATAAAACGACA
16790	8	74.3552	AATTCAGAACTTTATTTATTCTTTGCATGGTTACTAATATTTTTCAGGTTATTAGATGGTTGTTTTGGTTTGATGTTGGATAAATACAAACATAGATTATTCAAATCATTTAAAT
16815	7	36.1113	AATTCCGAGGTTTGTATCCCATAAAGACTTAAAGCACTCCACTAATGGTATAATTTCTTAATCTGTGATATTACCATGGTTACGGCTTTACTCTGTGACACTCTGTGATTACGAC
16828	1	45.0953	AATTCCATCGCGCCTCGACTTTTGAAATGTTTGTTTATTTTGCGTCAGATAAAGAAAACGTAGCATAGAAAAATAGAGTTCTTACACAATTTTTTTTAGGAAATTATCCACAAAA
16855	4	73.5388	AATTCTTAGGCAAATCGAAAATATCGGTCCCTTGTCCACTGTTTGAATTTTACTTTATAATTAGGATAGTCAACATAAATATGATAAAAATATAAAACTCTATTTATATAAAAGT
16863	3	27.3985	AATTCAACTTTTGCTTGAGCCCTTTCAAACTAATCAAAGGTTCTAGTGTAAAACTAGTATCTCTTTCAATATCATCAAATTCATCTAAGTCTACTCTATTGTCATTGTCATCATC
16912	1	9.75973	AATTCTGTCTTGTGTACATAGTGATGAGCAATACTGGTCTTGGTTTTGCGGTCTTGATCTTGGTCTTACACAAAAAGCAAGACCAAGACCACCTGTTATACAGACGAAACGGGTC
16982	3	151.483	AATTCTTATTGTCTTGAAAATAGTTTTTTTTTACTTATTTTAAATAAAAATGGTATAATATGTATGTTTCTGTTGTTTTGGTTGGCCCCCAATGTAACCATAATATAAGCATAAA
17019	11	67.6842	AATTCTTTTTCCAAATTTGCAAATGAGCCACTTGTTCCATTTGAAAAAATTGGCATATGATTAAAAATACGATTTGGGCATTTTTTAACCCACCAGGACAAGAGACAAAAAACAT
17084	8	4.69757	AATTCGTAAAATTCCACCTGTCTAGATCTAGAATGCTCAATTTTAAACAGGATATCAATAAGGGTTTGAAGAGTTCCGACCAAAGTAGGGCGGTAATAAGGTTTTCCAGTAAGTT
17166	1	30.1981	AATTCATAATAACTCGCAAATTTTAAAATAAGAAACAACATAAACAAATAAATAAAAAGAGACTGGCAAATTAAATGGCAAAGAGAGGGACAACGTTCCCCTAGCGCAACTCAGA
17167	8	117.321	AATTCTACGTGAAAAAATCTATGGTGATTCAATTTTCACCTTTTTAATAGCTTATAGGATATCCAAGATCTGAGGGATCTATGCAATGATTTCAAATTTTCCCAGCATTTCAGCA
17181	5	110.99	AATTCCGAGGTAAAATTCTCTGGGCACTCCACTATAAGGCCAACTTCCACAAATCTGCAACTAAATAATCGGACGACTAATAATTTCCTCATAGTTTATTGACCTCGATTTTTAA
17209	2	83.4766	AATTCTGCAGAAAAAGTTTCTAGAGGTAATTAAATATTCTACTAGTGATGAGCAAATGTAAAACCAAAACCTAGAGTCCCTTGCAAATAGTATTGTATTGACTCAGAGTGGGTCC
17236	3	159.056	AATTCTCGGACAGGCTGACGGTAACGCCAGCTACATCTCGGACATGTTTTGTGCCACGAAATCTCCCATAAGATTGCACATCTTATTTCTTCAATCAACGCTTTTACGTGAAAAC
17239	8	81.1247	AATTCCAAACTCAAACTCACTCTCGTACTCGTGTAAATTGTGTTTTAAATAATATTCTTTCCAGCCAAAACACACACCGATGCAGACCTACCTCTCGTATCGTGAGGGTGTGCGA
17245	2	71.816	AATTCAGGTGGTAGCCCTGCTGTAAAAAATGCCAAGTTGCCACATTTATTTATTTATTTCCTGACATTATAATTTGTTTTAATATTTCAGTTTTGTATTGCGAGTTTTTGGTATA
17351	5	12.5588	AATTCTCGTTTGAATTAGAACTCTTGGCAGCTAATTGGCTCCTACACAATCCCCTCCGTTTTATTGCTTCTATATAGTGGTATTCGCGTTGTTTTATTCAAAAATCAATAACCCT
17438	3	63.8081	AATTCAACACTTGTTGAAATTTGAAATTTGGGTTATAAGTTAACGAAAGTCGATATATTCGATATGTCTAAATAAACCGATTGGATATTACACAGGGAGAGCAAAAATATTATTT
17525	4	12.6701	AATTCACCTGCCTCGTTATATCCTGATTCTTCTTCAATTCTAGATCTTCCTCATCGAAATTTTTACAAAACAACAAAATCGACAGAGGGTAGAAATACTTGTCCAAGTTTTTCAG
17597	1	106.483	AATTCTGATCGCGTCGCTTGTCGCGTCCGCTATTTAAACGTAACCTAACTTTGAATTTAAAACTTTGAAATAGTTTTGTTTACTAGGTATTTTAAAACTAAAGGGCTAAAGTGCT
17606	5	63.0902	AATTCCGCAACTTTCTACATTTTTACAAAAGTTCAAACTGTCCAACTTTCATACATATTTCAAGTCGCGATAAATTTGTTAATATTATATGCTAATTCAGGAAAATATAATAAGA
17615	1	106.483	AATTCTTAAATATATTTCGTAATATATGATTCAAGGTCTCGAATACCCATAGTTTTTGCGGAATATAGTCGATCTTAAAATGCTCCAATAATTTCGTAATTACCTATGTGAATTG
17643	8	87.5847	AATTCACCAGAACCTCTATTAATATAAATTATAGTATTTGGTTTAAACCTTTATTAAACCATTCTAAAAGATTTCTAAAAATACCATACCTTTCTAACTTTTTAAAACATGATTT
17653	1	16.6223	AATTCAAACATCCCACCACTCTCTTGTCTCTTGCCAGCTTGAATGCAGAGTTTAGTTTCGTCCTTTCCAATGCCCTGTTTAGTTACGATTTACTCAAATATTTAAAGTTGTCGAC
17655	2	53.8954	AATTCTAGAATGTATTTCAGGGAATTTCTTTAACTTCTACAGGGTGGCTCACAAAAATGTGAGTGAAACGGGATGACTTTTTTAAATGGAACACCCTGTATATTATTGGCTTCTT
17695	7	52.6128	AATTCTTGAGACTGCAATTAATTTTAATATATGAATCTCTATCAATAGAAATTATTTAACATCAACTTTCTCTCGATTTGTCGTATCTTCGTCCTTCCTTATGTCTATTATACAG
17726	9	88.6532	AATTCTTTACCGTGAACAGTTTTGAACAATTCTGCATCAACTACTGTAACGAAAAACTCCAACAGTTCTTCAACGAGCGCATTTTGAAATTCGAACAAGAACTGTATAAGAGAGA
17779	5	24.8912	AATTCTAAATTTCAAACAAAGGATCCAACTTTATTAACTTAAGTAATAGGTCATTGATTTATTTACACAATAATCTGTTTACACTCCGTTCCGACTGTAGCCCCTGATGCCCCGA
17842	5	45.7146	AATTCTGACGCTTTTGTGCCATTCTTGCGGAGTTTTTGATGTTTCAAGAATCTTGTTAAATAACAATCTTAGATATTTTAGTAGGTCGGAACCAGCATGCTTCAAAAGTTAATTT
17981	1	63.8954	AATTCTTGGCACAAAAACATTTCAAATTTATGGTTTCAGCATAATAACTGTTTAGTCAACATGTTTAATTTATGTCAGTGATGACAGGTATTGATAATTTCGATTCCAAATATCT
17997	5	166.173	AATTCCAGTAAGGTTCTTCTAGACAGCAAGGAAAGGCGGCAATGCGTATCTTACATAAGTTCTGTTTTGCGACTTTTTATTAACCTTTATAATAAATATTATAATTATAAACACA
18027	5	126.794	AATTCCCCAAGAGGAAGCCCCTGATATCTGGAATCGGCAAAATTTTGACATCGTATAATGTTTGTCACAGAAGACTTTAAGTTTTTCGATTGCTTCCATGCCACAGCAACATGAA
18035	3	4.09192	AATTCAGAAATTGATATCTCGAAATCTATTAGAAATAATTGACTGTAGTTTTTTCAAAAACATTCTTAATATTTCTGCTGAACGAAGAAAATATTGTAGACAGTATGTGAAAATC
18077	11	59.8513	AATTCTCCAAACTTCGTGGTTTGGAAACCGACATCTCTTGTTTTGATCTTCAAAGATGCCTTTTCGACAGGATTGCCATATTCATCCATCACAAATCCATGTACACCCCTATGAG
18195	3	131.632	AATTCGGGCCCAGACCAACTATAGTAAATACCTACTATAGTTTTGACTGGACTGAACATAAAAATGGATAATCAGATAATGATTTATTGCTTTTCCTAGATCTGTCAGCAAACGT
18267	1	30.6895	AATTCATAACAATATTTCCTTTTATATTTATGAAAATAAATGATAAACTACCCTTACGTTACGCCTATTTTATTTTCCAACTTCGGACATAATGATGTTATAGAAAAGCAGTGGC
18346	7	83.5028	AATTCGCAAAATATTAAAACAACTTTCTGTCAATTTTCCCGCCTCTGTATTTTTTTTGAAATTGGCCAATAACAACAATATTCAAAATTCGCGTTTATATGAATTATGACTACCT
18373	8	21.4091	AATTCCAATTCCAGACTACGGATTGAGTCTTCCAGGTTCTTGAGTTCTGCTTTAAGTTGGTTTCCACTGGAAGTAGAACGGTTCTGGTTCAGTTAGCGAAGCCTTCGCTCCTTTT
18405	3	52.1369	AATTCCGATTAACGGACGTGTTTATGAGCGTCCGTGTGGGCGAGCTTTTTCCAGTCGGTAAATGGGGTATTAGGGGAAAATTTATCATTTTAATACTGTTAGATGTTTTTTTATT
18458	10	31.5507	AATTCTACCACCTCAAGAACTGACCCATCCCGTGCTGCCCGTAAAACTGAACGATAAACTCATGTTCGTGTTGTGTTACACATGTGGTAAAACAGGTGCCAAAGACTGTTACCAT
18550	8	96.2558	AATTCGACTTCACTCGGCAAAGCTGCACATACAAAACATATCACATCGTCGTCGCGATATCGACGCGTCGCGCACTTCGACGAGACCGATGTCCTTTAATGTCCTCTCGTCGATG
18601	4	61.3171	AATTCTTCAGTTTTCTTCTTCTTATTGACAGATCAACATTGACAGATCTGGATTTTCTGTCAATCCCATCAACTTTAGATGCCCATTGAGCTTGCCACGCCTTGTTAGCAGAGCC
18632	11	28.9716	AATTCTGTTTTATACACACTTCTATGTTATACATAGAATTATAAAGGGTACTAAGATTAATACTAAAAGAAGGAACCTTTCTGGAGTAATGAATCCAACAAAAGACTTCTTTCCA
18641	3	78.2995	AATTCTGAACATCCTGTAAGATTTACAATTTCTATATTTATAGCAAAGTAAGTACAGACCATCTAAAGTAAATACCTATTATCGTTTTGATTTCAGGACAGTTTTTGTAGTATTA
18711	5	106.382	AATTCTGTATACTTTCTAATTAGTACGAGAGCTAGCAACAACGTCGGGAAAACAAGTATTTTAAAAAAGTTGGCTCTTTAATATATCGTTTGATATAAAAAATGTCATACCTATG
18778	8	132.791	AATTCAATAACTGTGCTTTAAAAGTAAATGTCTTTTTGGCGAACCTTAGTTCAGATAAAAATCCCTAAAAAATATTAAATCTCATTCTTATATTCCCTGTTAAAACAAATCTTAA
18780	8	80.6438	AATTCAAGGTAACTTTTAATTACAATAGAATCATAATATATGAACTGAATAGCGTGTAGTTCTTCCACTTATCTACTGAATTAATGAGGATAGTTAATTATTTTCCTTTAAAGAA
18788	11	1.4726	AATTCGCATCTTTTGTATCGAAAAGTCAAATAGCAGCTAGGAGTTTCTTAATAGATCAACATTCCGTATGGCATCCACCAAGACTTTTGGCCTTGCCTAGGGAATACGAAAAAAT
18830	8	115.911	AATTCAGATTCTTTGAGAAAAATGAGGAACTAACCAAAACAGGTCATCACCGAGTGCGTCGAGACAACAACCATTCATGCCATGCACTTTGGTACGACTGATATCGAAGAAAAAC
18859	5	17.4559	AATTCTACAGTTCCTATACTTGATATGGTATATGATTTGAAACTTCCTTATATTTTTTATAAGAGGATTATTTGTAGTCTTCTATACTGGGTGCGTCTCAAAAGTGGCTCACCCC
18927	8	165.612	AATTCGATAGGGGTCAAAATAGAGTATGTGGATCCGAATTTGAGTCAGTCTCCTGAAAGATATGCTAATGCTTCTCCTAAGTATGACCCAAGTTATGAAGATGGTAGATTAAAAG
18967	3	36.8682	AATTCCTTATCGCCAAAAAATTCCATTAGCATTTCTTTAAACTCGTTTTTCTGTCTTATTGTAAAAACCATTTTTATATTAAATTCTTCAGTGCTATATTTAAATATATTCAATG
19015	2	4.44512	AATTCTTGGGGTCTGGATACTATAGATTTCGATGAGACATGCGATACATTGAAAGACCTAGTTTCTGAAGATGTTATTAAGAGTTTATTTGAAAAATACGCTGAAGAATCTCATG
19026	3	77.3366	AATTCTTGGGGAACGTTGAAAGAATTTCTAATATTTGTTATAGTCCAAGCCAGAAGTCAATGAATGTTAACAATTACTGGTAAAAGCTCTTTGGTTACTGAGCTGCTAACACTAT
19050	5	118.179	AATTCTTTTGGTTTGCGTTATCTCGTTCGGGATTTTTCACCAATGTCTAAGAGATGCGCACTACTCAATTCCCGAAAGATATCGCCACTCTTCTTTACAGTATACTACCGTTGAT
19065	1	65.3528	AATTCATCTCTCTCTTTTGCGGTGTGACTCTCATTTCGCGAGACGAGGAGACGCATACAACTCTCGCAAAATTTATGGATGTTTTTAATGCCCGAACTTATATTAAATCATAACA
19084	5	132.764	AATTCTAGTAGACTGAATTTTGAAGAAAACACTATTAATACAGTACTTCCTGTTAAGAAAAATTAAAATTCTTCGAATTTGGAATTTTAGAGGGCTTTAAGTAAGTGAATTTAGT
19107	7	103.05	AATTCTTTCCGATTTCCGATCCGATAACTATAAATGAAGAGAGTTAATACCACCTCACATAAAGGAAATCACACCTGGCCTTATTAACGTCCATGCACGCTATTCGGTTTAGCGA
19237	4	43.0687	AATTCCTGTGTGTAAATGTCTATGTTTTGAAATCAATATTAGTATCTATAGTTTTTGTACATTATGCATTTTAAGTGATTTTTAAAATCTATTGTAGAATAATAATATGCAATGT
19269	8	165.612	AATTCTCATCAGCTGTCGGCGAATGAGTTTGCAGCATAGAGTATTCTCTACCCAACGGAGGACTCTGATTATTTGGAGGAGTTCCATAGTCTTGTGCTCTCATCGGAGCAGTGAA
19298	1	55.5241	AATTCGTTATTTAATAGTGCGCTAATAATTTTCCCGCGACCATTTCAATCGGTCTCGGTGAAAGTTCGTAGAGAGCGTTTTGTCTTATTAAGGGAACTTTTGCATACCGAATAAA
19313	5	183.741	AATTCAAAAATCGGTATCTCGAAATCCATTAGAAATAATTGATAGTATTTTTTTTAAAACTCTCTTAATATTTTTGCTATATTTTCTTCGCAGACAGTATGTAAAAATCTTTATA
19336	5	111.57	AATTCTACGATTCTGTCTATTCTCTATCCAACCCAGGCTTATCAAAACCACCAAAAAATTGATATATTTTTCCTCTACTACAATACTATAGTAATGTATTTTAACTAATGGGCAC
19378	11	37.8544	AATTCAAATTTGCCTAACCAACGAAAAAAGCTTGTTTTATTATAATTTTATGAAGATATTTGTAGAATTATAATAATTAACCCGTCACTAAAATATAAACATTGCTTAATAATTT
19428	1	59.4983	AATTCCCTGAGTTACGATTTTAAATGGTATCGATACTGTGAAGGGGGGGAAATCCGATACAATAAGCCTACGCGCTGACCTGTCATTTATAGACGGCCCACTATTTAGTTGCAAA
19542	9	38.8317	AATTCAAAAATACCGAGGGTGTCATTTAAAAATTTAAAGTTGTAGGCATTTCAACAGGAAGTGACCAAAAACAATTATTGAATATGTCAATCGATCCTAATTTATCTCATATACT
19550	5	118.178	AATTCTGCTACAGTTATCGACCCTATAACTAAACGCCGTATTAGTATAGCGAAGGCTATCGAGAAAAAAATTCTGGATAGTACGGGGCATTATAAAATTGATAATGAAACTCTCA
19660	1	44.6029	AATTCTTCCAGTGGGATTTGCCTCAATAGCCCTACAAATTCCTAATTGCTTAGCATTTCGTAGGACCGCCTGAAAAAAATGTAATATATATGGCATAAGTACAAGGTGATCCGCT
19669	9	17.1204	AATTCAACTTAAAACGCTAATCCTAAAATAATGGGACCGAACTTATTATAATACTCTTTCAAAAAAATTACATTTAGATATACATTTCCGCCTGTTTCCTTAAGCGCTGCACTTA
19702	5	64.192	AATTCTTAATCTATGACATTTATAAATATTCAGTCTAGCATGCTGTAGGAATGTACCTAAACACTAATATCGGGATTGGTATATATTATATATTCTAAAATGCATATCTTACAGT
19717	1	18.8171	AATTCTTAAGGCCTCAAACGCATTTGTAAACCGACTGATCTTTAAAATTATCTAGATTAAAACGCCCAAGGTAAATGACTAAGCATTTACCGCTCGTTAGGATAAACGTTAAAAA
19731	3	52.6186	AATTCACCGTGAACCGAGTATGTACAACCCAGCCTTAGTAGTACCTATGGTACGCAAGTGCGATTTCTGCGTTTTGTTGGTCAACCCATCTGAAAATCATTTTTCTGGACAATTA
19761	9	10.7757	AATTCAAATTTTCTTCCATGGCGAGCACTTAAAACATCAGCGCAAAAGTTGCTTTCGAATACGTATTCAAATTATTCGGAAGATAAAAATAATAGAACATTTATTCTACATTCGT
19810	5	19.4824	AATTCGCGCGTTAAAATATTGGTTGCATTTTTTAAAAGCGTTGTACTTCAATTTTATAACTCAAGTTAAATGTTTGTAAATAATTTATCATATTAGTAAGGTATACAAAGTGTTT
19906	9	11.2573	AATTCTTATAATATATCGTGTTTTTCAAATTTAATACATATTTTAAAGCTAAAGAAACCAAATATAAATTTTAGTTACTAAATGTCTTTCAGAAAAACGTTGAAGTTATTTTTAA
19970	3	15.2699	AATTCTTTAGTTCACATTAGTTCCCGACTAACATTGCCATCCCCGTTGCTTTCTCATGTTTTTGGCAATAAGTCCGAACTCTTCATAGTATGATCTGTATAATTTTTATTACAGA
20031	5	15.1015	AATTCAACTCACTCTGTCAAATTACTGTTGTGTGGATTGAATGTGTAATTATAAAAATGGATTGTAGATTATTTATCTAATGTTATGTATGAGGTCGTTAATAATAAATAATGTA
20055	3	52.137	AATTCACCCATTAGGTTGCGTATCTTCCTAATTTTGTCAATCAACGCTGCTACTATTATTTGTAGATTTTTTATATTTGTTTTAATGTATATAATATTTCTAATAAATTAATAAA
20074	1	46.5744	AATTCCTCTTGCGGAGACTCTAGGTGAGGAACTCGTTGGTGTCCTGCGTAAGCCATCCTGCGTGTCCAACCGATCATTCGTTACCCAGTAAATGTACGGAAAAACTGCGAACGAA
20167	7	19.2379	AATTCTATACACGTATCAAGTTCACTGGTACAAAAAAAATAGAATATTAAACAGTAGTATAACAACTGTTAAGGCACCATCCTCCAAAATACTTAGGATTTTGCTGACCAATAGT
20235	5	163.937	AATTCCTTTAAAATGCGATGGAGCGTTAGCGGGGAGGTGTAGGTACTGTTTGATGTATTAGTCGGTTTAGTTAATATTTATAGTGTTTGTTTAAGATTGGCGAAGATAATGATGA
20252	2	0	AATTCAATTTACTACTAAAATATGGGACGCGATATTTTTTCCAAGTAGTAGATACCGAAATATAAATTTTTCTTTCTAATAATAAAAAAAGAAATCTGCCTTAAAGTAATCAACT
20306	8	171.942	AATTCTTTAGAAAATTCCAGAAACCATCGCCAGGGGGTATATAAGGCCCGCGCTTTTACAGTTGGACAAGTCTGAAGTCTGAAGATAGTCTGAAGTCTGAAGATAGTCTGAAATC
20308	2	77.1852	AATTCCTTGATACAGGTTGAGCTTGTTCAGGTGACAGCCATATGTCGTGTCAAGAGACCTGTTATAATCCGCACTTTATTCCTGCTAAACATTAACAGTTCCGTTGTGGTTTTAG
20313	8	107.244	AATTCCAATCGATATTTCTATTAAAATTATTAGTTTCCTCCTAAAAACTAATTTTAACAACTTGTCAAGCGTATACCTGTGTTAAACTGACATATACATGTTCTGTTACGTTGAC
20316	3	120.061	AATTCCGTCTTGTTCGAATTATTAATCAAAAACTGTTAAAATTATTGTGCATTGAATTTTGATGACGAATATCTTTTAAACGGTTAATTTAATCAACTAATCAATGGAAACCATT
20324	1	0	AATTCAGAGATATAGAAGTAGGGAGGAGAATAAGTTACAAGGAGTGTGCATCCAAAAATTTTCTTATATCATGTTCTCGCTTAGATCTACAGGGGAGATCAATAAGTAATAATAA
20400	7	53.0939	AATTCCAAATTCAATTGTTTTTGGTCACTTCCTGTTTCACTGGAAATGACTATAACTTTTGATTTTTAAATGGCATATTCGGTATACATATTTCTTTCTACTTTATTCGATAGAA
20420	5	111.57	AATTCAATACCAAATTAGTTTGTCAGTTACATTTCACTCTTAAAACAAAAGTTTCTGGATGTATATCTCCCATCGTTGCCGTTGGAAGCAAAAAATAAAAAAAAAGAAGAAAAAA
20476	3	46.2854	AATTCCACAAAAAATGCTACGATATCAACCTCCAGGAAGGAGAAGTATTGGACGACTAATACAGGGATGGTGAAGCGGAAAAGGTTTTAAACCTAAACCGATAAAGGATACGACG
20543	8	74.3548	AATTCAGGTGATAGCTCTGCTGTAAAAAATCAGTCTAGTTGCCACATTTATTTATTTATTTCCTGACATTGTCATTCGTTTTGACATTTTGGTTTTGTATCACGAGTTGGTGATA
20563	5	124.641	AATTCAAACTGTCTGTGCGATCAGCGAATTGAGCGAATCCCCTACTCCTCTTTTTTGATCTAATACCACTAATTTTAACTCCTACGTAATACCAAACAAGGGTAATACCGAATAA
20595	5	135.662	AATTCCAGTGAGAAGAAAGAAAAATCCTCTAGGGAGAAGATAATACTGACTTAACAGATTCCATTTGTTCTTTTTAACGTATGGAATCATAGGTACTCTACTATCGGAATTTACT
20720	8	155.243	AATTCCAGTTTCGAAAACTTAGCGAAAAACTCTTATCGAACCTCTACACCCTAAAGTCAATCCGTTTTCCAAAAATCAGCTTTTTACGTCAAGCGCTTTAAGCAGGATCGTGATT
20861	10	19.3703	AATTCTTCTAGGTAAGCTTCTAGAATTTAAAAATTTGAATTAAAAACATAAAGCATATTTCAAAACGGAGGGTTTTGTTTAACTGTCCAACGTTTTGTAGAATAAGGTCTCAACT
20887	3	52.6185	AATTCTAAATGCGGCGTTATGTCGGGATATACAGGGTGAGTCTTAAATAAGTGCAAAGGGGGGCAAAGACCGAAGTAATTTTCGCTATTCTTGTCCAAAAGTTGCTGTTAACAGT
20893	7	104.017	AATTCATTATCAAACAATCGTTCTAAGTAGTTGTTCAAAAATCAATTATACTCGTATACTAATTCAAATAACAAGTGTATGTACATGTATTTAATAAAACATTTTCGACCTAAAA
20936	10	40.2318	AATTCAGTATCACAATTTATTCTGTAAAATGACTGGCAATCAGTGCACGACGCACTCCATAACCTTGAACATTTCCTCTTATTTCCATGTTTTCTTGTAAGTTTACCATGTTCTT
20965	3	40.7594	AATTCTCAATGTACTTCAGTTAATGGGGTTTTAATTAATGTCGGATATACAGGGTTACTCAAAAAGTTCTATTCTACTAATAATTGCTCTGCAAACACGTTTAAAAATAGGAGAC
20985	5	118.179	AATTCATATATTATTACCACAAAGATATAATTCACATAAAGGTATCTGGTGGTGTAGGGGATAAGGCTCTTGTCTAGCAACCCGAAGGTAGCGGGTTCGAGGCGTGCCGCCGACA
21004	3	47.7975	AATTCCTCGCGTCGTATTCCTAGTCTGTCACGACCGACCTCTCCAAGCACAACTGCAACTGCCTACTGCCTGACCAGCCGACTAGACAGTGTTTCCAACTCTCAAAAATTTATCT
21142	1	10.2417	AATTCGGGCCCTGGTTTCAATACCAGGTTAGTTATTTGAGTTATTTAGCATTTTTTTCCACCAACAATAGTACCCTATGATAATATATTAGTAATTTAGTATTTTGTTAAGTGAT
21146	5	98.6589	AATTCAATAAAAAATTGTACATATTCATTTTTTAAAAGGCTTTTAAATAACGTAGTTCGAAGATTGTTGATCAACATATATGTCAAAATTTGTGCCCGTCTCCTAAATACCTGTA
21204	8	31.7751	AATTCAGCTCAAGAAAACCAATCAGAAACAGCGCTAATTTCTGTAATTTACAGTCCACTCTTACATATAACGTACAGCAAATTAAATAAAAGAAACTCGAGAGAGAGTGTACGTA
21271	4	10.2638	AATTCAATTATGAAGTAAGATATCCTCATGGGCAGATGTTGGTCTTTAATTGTGAACTTTACTAAACGTTTCGGTTGATCGTTATAAAGTTTGAACTAATCTAATTCTTGAAACA
21284	5	98.659	AATTCTGTGATTAAGAAAAATTAAGAAATTGTGATTAAGAAAATTGCGTTTATCTCATCAAGGAGATCGAAATAAACAAAATATAAAGATAAAACTTTTAATCGACAATTTTTGC
21420	8	60.6431	AATTCTGCATATAGCGTCCTATTTTTATTTTCAGCACTATGCAGTGTTGCCATTCTATATCTTATTTACTGAAATTTTGGTTAAAAACACTATATCCGAAAAGTGGTTAAAAACT
21424	4	10.745	AATTCATACACTAAGTGATAAGTGTTTTAATTTTTTCAGTTTGACGCTTAATTTATATTCTTTAATGTGCTGCGCTATTACTTTTTTTCGACTGTATGATTTATGTATTAAACAA
21536	7	106.456	AATTCCCAAACGAGCACGAAAGAAACTCGGGCGGCGAATTATCGTCTATTAAATTGTCCAATTTATAAAACTGCCGCGATATTTCCTTTTAGGTGGGCACTGGGTGTTATCTCGT
21543	4	6.88424	AATTCACTTTGCAAAATATCTTTATTTTGTTTACCTTTCCCGCACTTTGTCAATATGAACAACACAAAGCATTCCTTATTAATTTCACTGTCTTTTCCTTCTTCAAACACGCTGT
21547	5	20.7881	AATTCATGAGGACAGAGATGAGGATATCTATGGAAAAGTAACCACAAGAGGAACACCATTTAAAAAATGTTGGGAAGTTGATTGTTTCCCATCGAAAAGTAGAAAATGCCAATGC
21584	2	27.4452	AATTCTGCCATGCGTTACCAGTTCTGTTAGCAAAATACCGAACGACCAAACGTCGGATTTAATCGAGAATTTGCTGTAGTTGGCCGCCTCTGGAGCCGTCCATTTTATGGGGAAT
21585	5	34.8287	AATTCGTGAATTACAAAAGTCACTGGTGTGCCTACGTATTGGCACTAGATGCTGGCGTACTTCCGTAGTGTGTTGTTTAATTCTCTTTTATCTATGGTTTAATTGGTGTGTGTAT
21603	4	34.3695	AATTCTGTAATTTTTGCTCTAGTTTTGTGCTAAATATTCTTGAACTATACTTTGAATGCGGTAGACAATGATTCAGTATTAAAACTAAAAGACTTCCATTGGCTTTATTTAATTT
21629	4	18.9372	AATTCTCTCTCCTTGTCTTCCATGGCGGCGTTGATCGATTCGGTCAGCAATTCCAATTGGTTCAGTTTTTCAGCTACGTCGGACGGTACGAGGTTCTGCGCTGCTTGGTACTTGG
21694	4	43.0688	AATTCTTGACGTTAAGCACGGCTGTAGTGGATGTATTTTTAGATTCGTGAACGAAGTACATTCTTACTTTAAATTATGTATATGTCAAATATTTGAATTTTACAAATGCTTAAAA
21726	5	71.3159	AATTCTCAGAATGTTGTTAACAAAATTTTCATCTTAAAAGCTGAAAATTTTAATCAATCACAATTGTTTATCTCCATAATTTACCGTATTAATAATACAGAAATTACAGCTCAAT
21770	5	48.6223	AATTCAGTTGCAGATTTGTAACCAATATAATTCTTATGGAGTCGCGCCACATTCAATCAAATAGTCGGCTGATCGGCTCCATAAGTATGTATTGTTTTCACTTTTACAACTAATC
21780	2	12.6843	AATTCAGTTAACTTGGCAGTTTGATTTCGGAAAAGGCCAATATCGACTCTGAGATACAGCACAGAATTAGCAGCGTCTCGAGAGCATTCTGGAAATTAAAAGACTGGGTTTTCTA
21810	6	110.883	AATTCAACCACCTGCTCGAGTATAACAACGAAAAATTAGCATACCTCAGTTTTGTCTTATTTGAGAAAAGAAAACTTAATTGAGAATCGGACGTCTTGGTGAATGACCATGTCGG
21828	8	26.5416	AATTCAATGATGCTGCCCTTATTTTTAGACTTATCAACGAATCTACTTGATCCTGAGATAAAAACATAAAAGAAATTAGTTTGATAATGTCAGTAATTTATTAATTTACAATAAA
21845	3	151.968	AATTCTAGTTCCTCGGGAGGAACTTCTTTTTTAATTTTTATCTGGAATAAAACTTACTTATATGTTAACCTAACCTAACCTAACAGTTCCTTGAACTAGGTCTTTAGTTCACAAT
21855	9	0.0001	AATTCAAAAACTGATATCTCGAAATCCATTAGAAATAATTGACTGTAGTTTTTTTCAAAAACTTTCTTAATTTATTTTTATATCTTTCTCATTTAAACATCTTGTAAAAGATCCG
21865	10	31.5583	AATTCTTCGTCTAGTGTATTGGGGTATTTCACGGTATTTTTGAAATTTTGAAATCTAGAAATTTTCAGATTTTATGGCTCACTATTCAGTATTTTCCTTCCATCATGCAACCAGG
22190	3	52.1371	AATTCATTAATAGCTTAATTAATAGGATTATCCAATTATATTTATAAGTTATGTTTATTCGAAGAAAATTGTTTATATATGATTAAAAAGAAATAGAAACAATAATGTCAATATG
22194	9	34.4669	AATTCTTATAGAGGTTTTTAACAGCAATTATGAGGGTTTGGTTAATGGAAGTGCCCTGCAATATCTCCCATAACTTGCTAGTGGGCATATTATCATATGCTTTTGAGAGATCGTA
22202	8	26.5419	AATTCTCGAAATGTCCAGAATTTTCTATAGTTGAGTTTTGATGAAATTTAATGCCTATTTTCGTGTGTACGAAGAGTTCAGTCAAATAAAGCGTTGGGTTAAAGTGGTTATGTAA
22281	3	160.175	AATTCAAAATTACCAGTTTAGTCGGGTACTGTAGCATGTGAAACTTTAAAAACGCTGTCCTGAAAATTTTGTCCTAGTGGACTTCCCCCCTTTTTCCCCTGTACTCTTCATTTGA
22340	11	55.9988	AATTCAAAAGTTACGAAACATCAAACTTAGTCAAAATTTTAGGGTGGCGAGGAGTTTATAAAAAAATATCTATATACGGCTAAGTAATTTCAGGTTTTACTGTGACACGTGTTAG
22389	8	107.245	AATTCTATGATAAGACAGTCTCTAATTGAATACTATCAAATAATCTATTTCTAGGGTCACAGTATGGCACGGGGACACTGCCATACTGTGACCCTAGAAAAAAATGAAGAATTTG
22489	5	19.4829	AATTCATAGGTATATTCAGCCCGATCAGTGATGATACAAAAGGAGCTATATCAATTTGTTTGACGTCTTGTTGAGTGCGGTTAGCTTTAACACCCGCACCCCATGCAATAAGTGG
22588	7	35.6831	AATTCTCCAAACTTTAGATCAACATGCAGAGATTCAACGTGAATTACAATTTTAATAACTTCGCAACTGTAAGTGTACTTTATTATTCTATATTTTCTTATGTGCCATGTATACT
22627	5	109.846	AATTCTTACAATAACGTCTTCTAACCGTACCAGGTGAGAAAAGTGGAAAAAATTTACGAATAAAGATTTTTTGGTTTTCAGAGGGGTATATCCAGAAAATCGACAATCGAAATCT
22668	7	54.5372	AATTCATATTGACATTTATGAATTATCTTCATGTACTTTATTTAAGAAAGGAAATAAAAGTGTTTTCATTCTAATTGTGAGTTTTATTTGAGTCCGCCCTTAATTTAAAATATAA
22683	1	29.7058	AATTCCGAGGTTTGTATCCCATAAGGGCTTAAAGCACTCCACTACAAGCTGTACAGTAATTTGAAGGCTCCAGAAATAAAGAAACATTATTGCAATTTATGAATAATTGAAAACT
22859	5	115.415	AATTCCCTTAATATAATTCACCATTCCTTTCCTCGGTGATAAACAAACTTTTGCAAAAAATGAATTTGGTCTTCAAGAAAAATCCCTTTGAATTTTTTAAGGCGTACCATGTTTA
22929	5	98.178	AATTCTCCGCCCCCGATAGTTATAATGTAAAATCAATATTATTTTTTCAAATCCTGTTGTGTTACATCAGATTATAACCACCCTGTATCACATGCTTACTCTATAGGAACCTTTT
22938	6	110.402	AATTCATTATTCATTCTTCTTTTTGGCTCAGTACGTTACTGCATTTTCATTTTATGACGAATGCGCCAGACCTCACTAAACAAACAACTATATTCTATAAAATATAGTTGTTAAT
23009	3	1.629	AATTCACCAATTAACAGAATACAGATTACTCTGTAGACAGTGTTTTCATCTCAAACTCGACCAACTATTGTCGACAACACTAGAGAAATAAACGTGGCTGTTTTTCGAAGTAGAA
23013	2	78.6294	AATTCGTGTATGTATTTGCATATTACTGGAAAACGGTATTAATAAAAAATAATAATAATACAAGATATTCTACATGTAGTATCACAACCCAGGGTCATTCAAGAAAGTTGAAGGG
23128	1	82.1628	AATTCTTCACTACATAACCTATATCTGCAGGTGTTTACTTAGAGCTTGTACTGGGAATACCCAAATGCATGACCCGTAGTTTAGTAAAACTCTAGACTAGGGAAAAGCGAAAAGA
23243	3	95.3567	AATTCACGACGAGGCACGAGACAGAAAAAGACGCATGGTTGTTGTTGTCCATGCTTCGAAATTTTACTTTAGCCGTGCTCGAAATATTAATGGCATTTAAATTTTAAAGATCGCT
23258	7	53.8155	AATTCAAGAAATTTTGCAAGACTTGAAATTTCTTTCATATTAAAGTCTTGTCTTGTCTTGAAATTCCAGACAAGAAATTTTGAAAGTCTTGTCTTGAATTTCTTGCAAGAGTCTT
23317	4	68.6047	AATTCTAAATCTTATATGATTATGGTTACTATTAGTTCATGCCCGCGACGTTGTTCGAAATTTAATATTTCCCCACCTATTACAATCAAGTAACTTTTTATAATCCTTAATGCGT
23322	7	61.5262	AATTCTTTAAAACGTTTTAAATACATTTTTCTGAAAAATAAAATGGGGAAAACTTATTCATCATTTTTAAAATTTACACGAGATTTTTTTTTATTTCCTATGTCCAGGTCGGCGA
23341	8	7.81112	AATTCTGCTTTCCAGTCAATGGAGAATGCTGCCTGTGTTGGTTCTGCGATACGGAATATGAAATAAATTTGTATTTCGAATGGTTCGGCTAGGGATTCTTAAGTTGAGTTATACC
23460	7	24.6029	AATTCACAATAGGTACCGAACGTGACAGCATATCTAGCACAACCATGTCTTTACCCCGTCGGTGAATGATAGAAAAATAATAATGCTGGAACCTTACTGACCATCTTGCAAGTCT
23472	11	22.5858	AATTCTAACGATATGGGGAATCCTTTTAATAAAGACAAATTGCTCCAATAAAACCACTGGGCGCTGCGGATGTGGACGTAACATTTTAATAAACGATGTCGTCTTTTTATAATTG
23475	5	19.4825	AATTCAAGTAGATCATGTTAATGTGAAAGCACTTAACAGACAACGAAACAGGTAAGAGTTTTGGATTTTTTTCTGATGTTTAGATTTACTACCGCCCGTGGGACAATTGTGATAC
23504	3	93.4118	AATTCATTTATGAACATTAAGAAGTTCTGTTTACACCTTTCAACCTCGTTGGAACATTGTTTGTTACGTGGAAGAATTTTTAAAGAACGAAATTTAAAAATTAAATTGCAGAAAT
23518	4	93.226	AATTCTTTGACCAAAGAAGAAACTGAAAAGTGCGTACAGTTTTGGAGGAGTGTGATTGAAAGGAACTTAGAACCGATAAAATGCAGCGTCATAGAAAGGATCAATGAAAAAGATG
23547	3	80.2799	AATTCTTCGCCATTTTGACTGGACGTCATTCTGAGATGGGCATCAGGTTTGATCTCTTTTCCGTTAAGTGTCCACGTAGCTGTGGGTGGAGGGTTGGCAAATCCTCTTACAATGT
23663	5	162.883	AATTCACACACGCTCACACGCAGGTACCAGATGAAATCCTACCATCATCATTCGATGTAATTAAGCGAAAATAAATTTGAAGATATGCGGAATTTGTCGGCGGCTTTCCGCCTTC
23680	8	119.695	AATTCCTGCTTTGCAATAACTATTTTATAGTAAATAACAATTTCCTTTATGGACAAAGTATGCTGAAATAAATTCCTATTGTAATTTTCATGAGGCTTTCACAAGAAGATTAAAA
23683	6	113.289	AATTCTTCTCGAAAATATTGTTGCTGAGCAGCCGTTTCACTCGGTCCTCGCTCAACACGAATTTTTGAATCAAATTCAACATCAATTTCTGTATTCTGAAGAGCTGGGCTCTGTT
23761	3	82.7458	AATTCTTACATTAATGTCTTCTAACAAATAAAAAATTCGATTTCTTTCAAAGGGGCATCCAGAAAATCGACAATCGAAATCTTTCAAATTAAATATCTCGGAAACTGTGCAGTTT
23767	8	37.4537	AATTCTTTTTCACTTAATTTCTACTACCCGAAACAGCGTTACATCACACAAACCTCGTATCTGAATGTTTTATAGTATTGTTACGGATTCCGTGGGTCCACTATTTAAAGTCACG
23785	3	52.6187	AATTCGCAAATCCCAGTTTCAAATAGAGTACCCAAAAAAACATATAGAATGGAAGAAATTAAAACTATCCCAAAGCGTCTGTGCAAGGGATTTTTTGGGCATAATTTCATTAAAC
23904	4	9.78166	AATTCAGGTAATTATTGTTTATATAATTGAAGGGCTTATTGTAATTTCATGGTAAGCCACTCAACCATAAATCAGTTTTATAAACTAGTAACTAGTGTTTTTCTTGCCTTTTATC
23934	9	8.35198	AATTCATAACTGAAAGTTTCAATGTTTCTTAGAATACATAAAAATCTAAACTTTAATGCGATATAAGCTAACAACAAAAGAAAAAATGTCACGGATACTTTAGCGCTCAATTATT
23947	1	16.6225	AATTCCGTTATTGAGAACTTGACAATCTTGACATCATTCATAAAATGCTACCACCAATTACGAAGCTCTTCGGCCGATTATTTTCATGTTTTCCTCACGTACCGTTATTTACTCT
23971	3	169.715	AATTCAATCGGATAGGCTGGATGATTCCACTAAGTCAAGTCGATTTGCTGGATCATCAAGAATCAACTCTACACCTTGGTCTAGTTTCTTGGACATGAAATTTTCGAGTCCTAGC
24010	8	30.3479	AATTCTTCTGTTATCTAATATACCAGTCTAAAATACAAATTTAAAATGTTAGCTTATGGCTAAAAATTAATAAAATATTATTTGATTGTAGAAAACTATATTGTGTTAAAAAAAA
24048	3	41.4848	AATTCCCACCTCTTTTTTAGAACATACATTTATACGATTTTTTTCCCGAATACATTTCGGACCACCGTGTATTATGATTGTGCATCATAAATAAAATATTTTTATTTTCACGTAG
24059	1	71.216	AATTCAGATTCTGTGAAGAAAATTGAGAAACACCAGAACACCTCATCACTGATGCGCCGAGACGACAACCATTTGTGCTATAAACTTTAGTATGACTGATATCAGAGATGGAGAA
24072	3	58.9127	AATTCATTAGAAGAGTACTTTAAATAAAAAGATCAAGGAAGTAGTACAATACTCTTAATATATTCATGCGTGGTAGACGGAGGTGGGGACCTAGGGTAGGGATCCTTGACAGTTC
24123	8	117.79	AATTCGTCCGTGGTTGCCATTTAGGTGTATTTCCTAGTTACTATGAACCATGGGGATATACTCCAGCCGAATGTACCGTCATGGGTATTCCTAGTATAACCACGAACCTAAGTGG
24137	3	15.2701	AATTCTTGCTCGCTCCTGTTCGCTCATCTGGTCTGGATGCCCCTTAATAGTAGACAAGGCCAACAAAAAAGTTTACTGAGTGCCTTACAACCACAAAATGACGAATACACGATTT
24167	5	200.502	AATTCCTGTTGAAATCAGGTTTTTGACCGTAGATGCCATTAAAGATTGTCAATCATTTATTAGTGTGAAGATTCCGAACACAAAAACTCATTTTCCAAGAGTGTCTACGATTACT
24195	8	187.372	AATTCTCGGACAGGCTGACGGTAAAGCCAACTACATCTCGGACAGGTTTTGTACCACGAAATCGCCCATAAGGTTGCGTAACTTCTTATTTCTTCAATTAACGCTATTACTAATC
24246	5	127.296	AATTCGTGACAAGGCTGATTTGATTTTCCCTTGCGTCTCAAGTGCTGTACGGTGGAGACACCAATCGTTCTGCGACCAACGCATCATAAAACACTTATTTTCTCTAATTCGGCCA
24253	4	31.4811	AATTCTAAGTGGCTGATAAAACTGTACTCCCGTTAAGATAATTAACTTTGATTTAACAAATGACTGCTACATTTTAATATTTAGGTTAATGCATAACTTTGTGTAAATATTTTCG
24373	5	118.178	AATTCGGTGGTGCCTTCCTTAGGTATTCTTGACCTTGAGCTAATACCGTTTCAACTTTTGGTCTATTTTCTTCAAGTTCATTGTAAATTTCCATAAAACGTTCAAGTTGTTCTGA
24384	8	8.01058	AATTCGGAAATTTAAGCTATTTTTAACAACGCTAGAGAAACTTGAAAAACATTTGCGTCCGATGCTATTGAAGTATAAGCTATGAGATACAAGTTTCGATGTAAAACAGGAAGTT
24474	8	145.75	AATTCAATAATCAAATTTATTTTTTAAAACATGATCAATTATCAACGTCTCTACAACGATTCGTTGTCGTTTTCAACTTTTACTCGATAACGACGTGTGACAAATTCAATTCGAG
24503	2	86.3643	AATTCTTCATCAATTACGATCCCTTTAATTCCAATCCTTTGGACTGTTGAAATTCCTAATCCTAAAGCGTCAGCAAGTCGCTATATTATTTAAAAACGCTATCAATTTGTATTTT
24528	3	80.9409	AATTCTGTTGGCGTCGCGTCCGCTATTTAAACTTAACCTAACTTTGAATTTAAAACTTTGAAATTATTTTGTTTACTAGGTATTTTAAAACTAGGTATTTTAAAAGGGCTAAAGT
24628	10	43.5997	AATTCACAATATCCTAACCTATCGATGTTTAGGAAAGTAAAATTTTATTTTTAATAAGCTATAGTAGTTAAGTAAATAAATGTATAAATTATATATTATACATTATTAGATATGT
24644	1	2.91045	AATTCTTGAAAAGGGAAAAAAATTATGGTCTAGTCTACTAAAGCCAAAGTACTTTACATCTACAACCTGTCATTTAAATAAGTGCATCTGTTTTAAGGTTTGGTAGATCTGGACA
24747	2	88.3263	AATTCCTCAAGGTTCGATTATCGGACCTACCCTCTGGAATATACTTTACGATCAGATACTTAGAACCGATACAGGCCTGGGCAACACGATCTTAACATATGCGGACGACCTAACC
24752	7	36.4249	AATTCTGGCCATCTTGATTGCCATTTTATTGAAAAATTGCTCTTTATTCAAAATCTGAGCTAGATAGGTATAAGAAACCCTAATATAGTTTGAAAGAGCATTTGAATCTGTTTCG
24781	5	3.16893	AATTCAAATACACGTGAGAAGAAATTTCAGATAATATGATATACCCTGACAGTAACTTAGTTCATTATTTAATTTTAATTTAAAACGTTTTTAATGAAACTATAAAATGTGTGGT
24801	4	68.6044	AATTCTGGAAATCTAGGACGATAAAGTTTAATATCGATGATGCTGTTGAAGGTATGTAGACAATTATGGCGTGTTACGTATTTTTAGTTATTGTATTGCTCCAAGTAATAAATAT
24828	4	17.9746	AATTCCTTAATTAGCCGTGCCGACCTTTTGTAGCTGACGCGTACAAATGATCTCAATTAAAAATGAATTTTTCTCTAATTTTTAACGACTCTATTTGGCCATTAATCATGCCCGC
24952	1	0.496174	AATTCGTTCCACTCCGCCGAAAGCCGCGTAAAACTTGTCGTCACCCAATTTCGGCATTACTTCGTGATCTATAAAAGTGAACAGGTTATTTTGGAATTTCTGCACTAATTCAGGT
25001	7	39.4316	AATTCCATACAACGGTATCAAAATTAAAGTGGACTTCAATAATTTCCTGTGAAAAAAATAAATTGATAAATATAAACCATAAAACCAACACCCATAACCATTAGCGTAACTAGCA
25075	9	7.03047	AATTCTATTAAAGCGCATGAACCGTAAAACGGAAAATGTAAATTAATGGAGTTTAATGTTTGCATATTGTGTTTCTCGAAACGAATTTAGTATATAAAATTTTCAAATAATTTTA
25106	11	18.3425	AATTCCTGTTAGCTAAAGTTGTCTTAATCGTTGGAGTATTAATTTGGATCATGTAGGAGGGAAGAAATCACGTTTTTGACCGTAGATGCCATTAAAGATTGTCAGTTATTTATTA
25231	5	0	AATTCTATAAATGTTAACAAATCTTGTTTATGTTTTTTTTAAATATTGAACCTTTTTCGTAATGTCAAATTAATTAAATTAGTTTAATCCTTAAAGACAGATCTCTCTTGTTGTT
25241	2	4.44492	AATTCTTTAAGATGTCCAATTATCCTAACGTAGTTTCCCACGGACGATTTGTCGAAGTTTTGCGGTACCTCCGCGTTGTTTTTCAGACCAAAAACGACATCCTTATACCTGAATG
25265	8	162.067	AATTCCAATCTGCAGAAGGGGAAGACAACCTTGCAGGCACTTTAACGATCAGCGAAAGAGTATTAGTATATATCTAAGTCTCAAAAAAATTAAAAATGGACGATCACCAGGTCCT
25276	5	150.141	AATTCTAAATAAATTTACCTCTTAATGTGTTCTGATAAATGTTTACAAATAACCTGTTCAAAAATCGTATCGTAATTCCTGGCAAAAACATTTAAAATCTTTTTAGAACTTATGA
25295	8	110.271	AATTCATTTACTGTGAACGAATTTTTAGAAAACTTAAAAAAACTGTTTTTAAACTGCATTATATTGTTAATAAGATATATTATAAAGTTTACCCATTTAAATTCGTTGCTTTCAC
25297	8	31.0617	AATTCACATGAGGACAGAGATGAGGATATCTATGGAAAAGAGATCTATCTAACCACAAGAGGAATTGTTACATCATTTAAAAAATGTTGGGAAGTTGATTGTTTCCCATCGAAAA
25303	8	140.857	AATTCATGTTTATGCCAGGTGTTGAAGTCGGTAATTTGAAATTATACTCGCCTGTAGTTAAATTTTAAATAATAACTTGATATTTTATATATGTATTTGTAGTTAAATGTTTTTA
25305	4	38.738	AATTCGTGACAAGGCTGATTTGATTTCCCCTTACGTTTCAAGTGCTGTACGGTGGAGACACCAATCGTTCTGCGGCCAACGCATAAAACACCTATTTTCTCTTCTTCGGCTAGCA
25346	6	4.82269	AATTCTGCAATTTTACGATTCGTGTAATTAAACGTATATAAAATTTATGTTCAATATCTGTATGTGAGCTTTGTAATGGGTGGCTGGGTGGTCCAATAATAGAGTTTTGTTAGAA
25402	3	101.87	AATTCCCTTTATAAAAATATTTAAAATGCATATAGATCTATAGACGCTCTCTTTTTACAAAATTACTCAAAAATAAATTGCTACATTGTTGTTTTGAGCTCGATCAAACAGTAAT
25429	7	30.3912	AATTCGAATAATGAAATGAATAATGACAAGAAAACTGACATCTGTCTTAAAAAGACAGCATTTTAAAGTGACAATTTGGTTATGTAAAATTTAGAATGACAATTTTGATTATGCA
25590	3	168.848	AATTCTTGTCTTGTGCAACACTAGTCAGCCCAATCCAAACCATGCCCCACCCTAACCAAACAATGCTTAAAATATGCCTTGAGCTAATGTTATATCATTGTGTAATATTAATCGT
25614	8	185.436	AATTCCTAATCTGAAGTTTAGTGTGATGACGATGACTTTGCCGTAAGCCGCCAGCACGCTGCCGTCATACGGATTTCCTGCATTCCACTCGAAGGATTCGCCATGCAAGTATACG
25620	8	132.791	AATTCAAAACGTCGCCCAACCAAATTAAAGTTTTGTAGAGAAGAAAAAGTGAAAATGGCAATGCGAAAAATTACTTTCATCTCTAATTTCAATTACGCTTAAACTTTCAGGTAAA
25661	5	165.682	AATTCAATTGGTTTTATAGATATATTTGTTTTCTTTATTATAAATTATATTATTTATATTAGGTCAAAACATTTATATTAGGCTAAAACACAAAACTATTCTTCAGATTTTAAGT
25740	5	126.487	AATTCCAGCTGCTCGACCCAGTTGCTGTATAAAACTTCATAATACATGAAAATTTTAATGTGCCTGTTTTTCATGCTGGTGAGTATAATTTACTGATGTTTTTACCATCTTGTTA
25809	5	163.937	AATTCTTTATATCCATCACAAGCTAAAAAAATATCAAGGTAGTTTGTATTGTACAACATTAAACATAATACATCCTCTTTGAGATTGTATTACTAACATAAGAATCTAAAGAAAA
25874	1	69.9527	AATTCTTCGAAAATGCAGCTGACCGAGGTTTCGGTTGCAGTTAGCCTCTGACATGCAGATGAGTATTCCTCCAACGAGTGTGGAATCAGAAAGGACCTTTTCTATAGCTGGAATG
25878	5	111.57	AATTCGTTGTAGTTTTATTACACTTACAAAAAGGTGTTTGAACAATTATGTCTGTGGTTTTGTGTTCAGAAATATACAACTTGTATATTTGAACGATTTAAAATTACTCGACCAA
25894	2	54.3785	AATTCAAGCAATGAACATGCTGGAAAATCTGGCGCGTGAAATCCTATTTTCTCTTTCAACAAATGAAAAATTTACTGAGAAAACTTTAACTGTCAGCCAAATTAAGAGATTTATA
25896	1	45.0954	AATTCAGTTTCCAAAGTACTAGCATGAGAACGCACGCAAATGGATTCTGATGAGGAAACACTCCTTCTCGCTCTTCTGATACGACGTCGTCGACGCTGCCGTCTTCTTCAGCGAT
25898	8	144.585	AATTCGTGACAAGGCTGATTTGATTGTCTTTTACGTCTCAAGTGCTGTACGGTGGAGACACCAATCGTTCTGCGGTCAACGCATAAACAGTGTGGATCTGAAAGCGACAGTGTTG
25912	1	83.8606	AATTCAGGTGGTAGCTCTGGTTTAAAAAATGTCAATTTGCCACATTTATTTATTTATTTCCTGACATTATGTCATTCGTTTTGACAGTTTAGTTTTGTATTACGAGTTTTTGGTT
25950	11	50.2195	AATTCTGTTCGCGTCCGCTATTTAAACTTAACCTAACTTAACTGAATTTAAAACTTTGAAATTGTTTTGTTTACTAGGTATTTTAAAACTAAAGGGCTAAAATGCTTATTTCCAG
26008	3	141.765	AATTCATTGTGCATTCAGTTAAAAGAAAACACAAAAAGAGCAAAATGTGTGTTTAAAAAAACATGACTCGTACACTGCTCTTTGTCTGCTGTAGTCAAATACGTGCAGCTCTTCA
26069	3	14.232	AATTCTTTTTCGTTGTGTAGCAGTTTCGTTTTTATTTTTGTTTGTTTTTTTATTTATTGTTTCCATGTTGTTCGCACGAGTAATGGACATTTTAACGGTCGACCCCCCCAGAGGT
26091	6	66.1392	AATTCAAATATGACCTCCGTTTTCCCTTATTATCCCCCATTTTTGGGTGAGACCTCCCTACTTATTTTTACTACTTGTCGATAGCGTGGAGAGATGAAAGAATTATTTCGGGTTC
26093	8	116.85	AATTCACTATTTGAGAGTATAATATCTTGATATGCTATACACTCACAAATTGTGTACATTTTTAAGCAAACAAGTTATCAGAAAAAAAGTCAAAATCCGTGCAGTAGGAATTGTT
26106	8	79.5565	AATTCATTTAAATATCGTTTTTGCTAAACTCAATACACCACATCACGTAAATTGATTAAAACTGCGCGCAATATGATTATAAATTTTCTTTTATTTTCGATGTCCGCTCTAAAGC
26130	8	59.6173	AATTCAGTGGCGTAGTCTGTTTTTCTACAAAAAAAATATGTTTGAAAATATGAACTAAAGTTATGTTTTTTCAAATGGAACACCCTGTATATTTACAAATCATATGATCCGCCTT
26229	9	52.4052	AATTCGTTGATCTACCAACGTTGTAAAATTGTACGCGTTGGCAATAAAATATTTGAAGAAGTAAATACACATTAAAATGTTTTATGGTGAATGTTATGAACGTCTCGTAAATTTA
26253	1	83.0679	AATTCTAGTTTGACTCCTCGTCCTAGGAGGCGCCAGTTTTGTACAAATTGGCAGGAAATAGACTACCTACTGATCTGTATTTTTTATTATCTATGAGTCTCTTTTTCAATGGCGA
26268	7	26.0456	AATTCTTTCAATATTAAAAATTTAAATGTTACTTTATATTGACTAAACCAAACATTATACGCGATAAACGATACAAAAACCTAGGTTGTTTTATAATTTGAGTTTTTATAAACAT
26287	8	142.651	AATTCGTGACAGTTCTCTGTCATTTTTATTAAAAATCAAGTTGTTTTACTGTCAAGTTGTGGATGTCGTCTGTTGAAATCGTCTCTTCTCTCCTGGGACAGACTTATCTCAAATG
26299	4	70.7846	AATTCGTGGAATCCGTTCTTCAAAATATACTCCCTCGTTTTGGGCATGGTCCTGATGAAATTCAGCCTCGACACTGAGTCTATGACAATTACCAGAACACTTATCGGTCTTTTAG
26344	5	120.948	AATTCATTAATTTTAAACCTTGACATTTTTGTGAAAAACACAACTCAATTAGTCCTAATTCGTCGTCTTGCCATGTCATCCTCAGACCAACATTAAACCGAATGCCCCTAAAGCT
26352	9	24.739	AATTCAGCATGAACTTCTGCATATAGTACACTACTTTTATTTGAAGCACTATGCAGTGTTGCAATTCTATTTCTTATTTACTAAAACTTTGGTAAAAACACTATATCTGAAAAAT
26403	10	0.996873	AATTCTATGCCGATCCGACAAAACAACAAAATAAATCATATTAATTCTAAAAATAGACAGGCGCAGCAATCAAAATATGATATGGAAACGTATAAATAACCACAACTCACACACA
26510	2	82.1859	AATTCTTCAAAAAAATAAGGAATGTTAGAAGCTATATTACTTAGTTCTATGTCCACGGAATATTGAGAAACCCTTGTATATTTAAGAAGCTTGAGTGGTTTATCCAAACAATTCA
26533	4	16.049	AATTCCACTTACTCGAGTTTAAATATCGTTGGTTATTATTTACATCAACAAAACTGACTTTCTTAACAGCACTTAACACAGGAACATAAAGGGCCATTACTACCGCTGTTCCGTT
26680	4	10.2639	AATTCCTAGAAAGTCCTAGAAACTAAAAGGCGTTTCTATGGTAATATAATTTCGATTTCATTCTTTAATAGATTGTTATAATTAATTTTGATTAACGTCATATTTTTTGATGTTA
26850	8	2.43497	AATTCACTCTTGTGCTCTTTTTGGAAATTGTTCACTTCTTTGTGATTCAAGCACAAAGGAAATGCAGAAAAACAAATGCTTGGACGTGCAAATTTGTTGCAACTTTGTGATATGT
26884	8	148.851	AATTCCAGTAAGGTTCTTCTAGACAAGAAGGGATGGCAATGAGTATCTTACATATGTACATAAGTTCTGTTTTGTGACTTTTTATTAACGTTTATAATAAATATTATTTTTATAA
27081	1	46.5743	AATTCCTGAGATACCTCGACGCGCCGCCGAAAATTTTCGTACTCGTCTTTAGTGAAACGGAATGGAGAGCGCATCGCGGCCTAATCAGGGCTAGTGCCCTCCTTGGATAATGTCC
27116	1	87.4634	AATTCTTCGGGATTGGGATAAAATTCTGGATCTCTGTGAAGTCCCCAGACAGGTATAACTACTCTAGTACCTTTCTCAATCACCACCTCCGTTCCTGGTACTTTGTAAGTCTTTG
27186	2	69.7319	AATTCGTATCTATGAATAGATTAAGAGCATAATAATTTGTTATCTTCAACATGTTAATAAATTTCAGTAGTTAGAGGCTTTAACATTTTTTTAAAGATATCAGCCACAGTGATCC
27242	1	55.0312	AATTCATTGTTGCCAACCATGGACACATTCGGCGGATTCAGGTGGTAGCTTTGCTATAAAAAAGTCAAGTTGACACATTTATTTATTTATTTCCTGATATTATCATTCGTTTTGA
27274	3	80.9408	AATTCTTTTCAAATTATAATAAAAATACGCTTTTTTAAATAAATGTTTTTCTTAGAGAGCTTATAAGCCAATAAAATAGGTTTGCGCAGTTTAACTTCTGGTTGATATAATGTCC
27294	10	59.7626	AATTCTTGTGGCGGTGGAGTCCATTGTGCTGCTTCTGGATCAGGGTTGGGTCCACCAAAACTGTTAGGGTAGTAATTGGGTGCGCCGTTTTGGCTGAAGATGCACATCAGCCCGT
27358	1	46.0811	AATTCTTCTTGCTGCTTCACCATAATCTACAAGCTGGAAAGCATCATCTTCATTATTGTTGATATCTTCCAAAATCGGGAAATCTTCAAAACATTATGCAAAATAAAGCAGCTCA
27409	2	64.5019	AATTCATATTATTGCAGGTATGGAAGTAGTGTTTATTTTTTTATTAATAAACTATTTTTGTATAACAAAACATGATCTTAAATACCTAAAAACACTGATTAAAGTTTCAAAATAA
27446	7	101.104	AATTCTTCCTCAGCTTTTTTCCTCTCTACACTTCTTGAGAGACTCTTCAGTTGAGAACCAAAAAATACTGACAGAAATGATGTCAGTGTGCTCAATGATTTATACCGAAAAACCG
27471	9	17.6028	AATTCCTGAGCAAATATAAACAAAAACAAATTATTTTTCTCTCTCTTCTCGTTTTTAATGTAAAATCGTAGCAAAAACGATCACCGTTTGACTGTAATACTCTTCGTGCGACCAT
27474	1	111.357	AATTCTGAATTGAAAAATCGATATCTCGAAATCCATTAGAAACAATTGATTGTAGTTTTTTTCAAAAACTTTCTTAATATTTCTGGTGTATTTTCTTCGCAGACAGTATGTGAAA
27507	8	74.3551	AATTCCCAAGAGAGTATGGGACTGGATCCCAGTAGAGAGAAGAAAACGAGGAAGACTAGCAAGAACATGGCGGGGTGATGTACAGGAAGCCATGCTTGTAAGACACCTGAGTGAT
27545	2	25.5133	AATTCAGTCGAAAATGGTATCAAAATTAGCCATCCTTTATATTTAATATAGAAAGTGTGTATCATCGTTTAGAAAATTATGTACAAGATGTTATTTATTTATCATATTAATAGGT
27557	6	87.5527	AATTCGTCTAGCATAGTGAGAAGGCGAAATAATTGATCCGATTTCTACATGGAATCATTTAGTCGACGAAAATATTCTACAATGTACATGGAAAATGGAAACATGTGTACATGGA
27582	5	65.2936	AATTCATTTACTATGAACGAATTTTTATAAAACTTTTTGCATTGATTGTTGATAGTTTTTAGGTGTCCATTTTTCGTGCCTGTGAATGTATTTCAAAAACTATAAATTTTAGTCA
27590	7	91.4337	AATTCAAATCATGTAGAGTGCTTTGATAACCAAAATACCTTGTGTTATTGAACTTTGTCAAACTTTAGTTTACTATCACTATCCAAAAAAAATTATTGATGAACTCTTGATCAAA
27615	7	55.9823	AATTCGAGCCACCCTGTACACTTATTTATTACAGTTATTTTTTTTAATATCCGTAGTTCTGTAAAACCTTTAAATTAATTTTAAAAATAAAGTTGATAGATTTTTATACAGTTTG
27618	5	141.936	AATTCCAATTAATGAGGAATATCTTCTGACACTTAATGCAGGCGATCAAGCAGTATTTGCTCAAGTTTCCTTTGACATGAAGTTTATGCTCAAGAGACTTTATACTAAGTACCAG
27671	7	70.7712	AATTCGTCCATTTAGAGTCATCGGTTCAAAACGTCAAGGGTGTCATCCTGTAGCCCGTCCCCAATTATGCCGAAATCGACCCACATTTTTCTTCAATATCAAATCCTTAGTCACA
27711	6	35.516	AATTCAATCTGAGTGATTCATTTTGGTTGTACATCCAAAGTGACACAGTGTAAACTCTGCTAAAGAAACAACGGCGAATGCAGATTCTATGTGGAAATTAGGGAAACACCAAAGC
27716	2	25.5131	AATTCTGAAAAGACAAACTTATACAAGAAAGTCAAAAGTTTAGTTGTTGCGAATGAGTTTTATTAACCATGTGTGATTTCACTGGTTTCCTACTGTTGGCAGCACACGCCATCCA
27719	3	81.7654	AATTCATAATAGCACTAGTGCTATTATGAAAGCCATAATGGCATCCAAATGACAATGTTAAATGTGTCATAATGACATTGTCGTAGATTAAAAAATATATATCTCTAGGTATATT
27731	5	141.936	AATTCCGAAATGACTCGTCGCGTGTTCTCTCTCAGAGAAATGTAGTGTTATTACGATTATCGGCAGACTGTCGTACTGTTTTATATGCCGACGTTTCACTTCTTATCAACAGATG
27734	5	130.929	AATTCAGAAGTACTTGTTAGGTATATTTTTTTGTATAATTTGTCACCTTAGGATTTGGTCAAAAATGGCGAAAATATCATCAAGAAAACTAATTTTCTGCACCAGACCATCATAA
27741	8	107.245	AATTCATTTTAGTGGAAAATTTTTAAAATAAAATAATATAAATCTGATTTGTTCGTGGTTCTACACGAAATAAGTGATTGTGAAAAAGAAAAGAAAATTTTCTCAAATTCTTATA
27808	3	81.7656	AATTCCTGAGACATTATCGAAATTTCATTCTTCATAATCGATGTATTGTCGATGTGTCGAGTTCACAATAAAAGTCGCTCAACCCTCAATAATTATTCTACAAAATCTGTTTCTC
27835	5	182.464	AATTCATGGTAGGCTTTGGAAAAAAGTTGCTTTTAAACGGATAGTTTAAACATCAACATATTATTATATCAACATTTTGATAGTCTCAGTAGCGTCTTTTTATCTTTTGATTGCT
27851	9	6.3683	AATTCGGCAGGAATTTCTTTTTTGTTAGCCCATCATAGTATATTCCTTTTGCGCCATTTTCCAATAAATACACACACTAACTTACTACATCACAATAAATACCAACACTAAACTG
27893	8	155.243	AATTCTTTCAAAGTCGTCTTCCGTTCTGTGCCTGTGTAAATAGATCCAGATCTTTCGTTTCTGGTCGTACCTGTAATTTAAAAATTAAAGTTAAATTAATAATACAGGGTGATCC
27902	1	61.7119	AATTCCTAGAAAATTACATTTACAACTCTAATCTGTCAATGAAGAAATATATGGAGGTAATAATTGTTTTTGGTCAGTTTATTTCAAAACTAGATGAATACGGATTGTCGATATT
27919	7	47.318	AATTCTTCATCCGCTGCGCTGTAAACGAATATTTACGCGCAGTGGCGCAGAGCTAAACTAAATCTCCGACACCTGACGGTAACGCCAACTACATCTCGGACACCTTTTGTGCGAC
27927	8	148.851	AATTCGAGTTTCGAAAAATCTCTTCTTATCGAACCACTACACGCTACAAGCGCTTTAACCAAGATCGTGATTAATCAATGACCAGATTTTTCGAAACACCCTGTATACATTTTTA
28033	1	46.0812	AATTCTGGGTTTAGAGTATAATTGCATTTATCGTTCTGCTGTTGTACTGCAAGTGATGTCCTCGGGCTTTGCAATAGATGAAAATAAATTTCAAAAATATTCGGAGGAAACCGCA
28037	5	169.31	AATTCGCTGTGGTTATCGTCAATCTTCGCTGAGAAGAGGCACCTGGAAAAGAAGGTGGCTTGAACGATGTGCGTCTTCTGGAGAAGGATGTACATACATACAATATGCAATGAGT
28069	5	116.675	AATTCTCCTTAATGAATGTCGGAATTATATACTGGGTGTAAAATAAATTGGTTTAACGTACAATAGTAATTTTAACTACGTATTAGCCTATCCATATAGGTTCAAGTATCTCGGC
28072	1	21.0158	AATTCACAAATTGTAAATCTTCTTTAAAGTGCTTTTAGTATTTTTTGTATTATTTAAAAATACAGGAATGCTGATGAGTTTTTAACTTTGTTTTTAAATAGGGCCATATTTACAC
28074	11	35.7206	AATTCGTAAGTTCAGATTCGTAATCTACGACCTCAAAATAGGGTGTGTACCAATTTTGGTGAAAATCTGACGATTTCCAGTTTTCCCAATAATTACACTTGTTTATTATTAAAGG
28085	4	6.40203	AATTCATTTTCGTGGAAGAATCTTAAAAAATAAAATAAAAAACAAAATAAAATAAAAAATATAAATTTGATTTGTTCGTGGTATTTTACTTATAACTCAAAAACTAACAACTTAA
28086	10	54.9166	AATTCGAGCCACCCTGTACATGCCCGTGTATATTAGGACATTCGGAAACCCTATCTTAGAGAAAAACTTTCTCCTCTGTAGAAAATGTTTTCCCGATTTTCCAGCACGATTAACC
28087	8	85.4969	AATTCTATGTTAATAACTCTATGAGACTGAGTTTTTATCTTTTGGATAAGTTATAAGAAAAGTGAGATACGAGGGTAGTCAAAAAATGCAACAATTTCAAATTCGCCGCATTTCA
28150	5	19.4828	AATTCAGAACATCATGGGCGTTAAACACAGAATAACGGAAAGCATCAAAATTAACTAACTCAGGTGGTAAGGACACGTACAAAGAATGGAGGAGAGCAGAATCCCAAAGTAAGTA
28193	1	15.6537	AATTCTAACGAAATAAAATGATTAGTAATAATTATTTATTAATATTAGAAGAAATCTTCCGTCAACTACTACCTAAGATTCGCTGATGACATAGTCCTAATTGCCAATCATCATC
28266	5	80.3044	AATTCATGTCAAATACCAAAAAAGTTAATCTCAATTTTTTTGAAATTTTGAGCATTAAATACACAGTGTGCTACTTGAATAGTTTTGGGAAAGAATATCTTTAGTTAAACGGCCA
28342	1	83.0677	AATTCTGCAAGACCAAGACATTTTAATTATTAGTAACAGAAAGTAAGTAGTAAAATAAGAAAATTATTAGCTATTTAAAAATTTACGTGTAAAGTGTTATTATGTTAATTTTAGA
28449	3	160.175	AATTCATTTACCTCCGCAGTTTGATTTCGGAAAAGGCTAAAATCGACTCTGAAATTCAGCACAGGATTAGCACCGCCTCAAGCATTCTGGAAATTAAAAGACAGGCTTTACTACA
28458	7	70.7713	AATTCCAATTCATTAGCTAAAATACTTTTGGAATGAGGTCGATAGCACATTTTGGGATCAACGCTCCTTCTTATGTCTTCTTTAGCAAAATAGTGTAGGTAATGTAATGAAGAAT
28466	3	15.27	AATTCTTTTGTGCAACAGGACTGTTTGCGCATCGCGTATCAAACGCGTTTACTAAGTGCATGGGTGATGCAGTTGTGCAACCGAACGTTGCGCATCGCTTTGTTGCGCAACTTGT
28587	5	132.764	AATTCATAAGTTCTTTTGTAACCCTTATTGTTAACCACACCGCACAGTGGTTCCCCTTAATGAGCTGCGCGGTTATAACTGTTAGATATCTAGATATAACTTGACTGCACTTTTT
28638	7	59.8413	AATTCATATTTGGGCTATGATATCTATTAAAATGAACATGAATATAAGCAAATACACTAATTTAGTAGCCTAGGTTATCTGTCAAAAAAATCAAAGGTGCTAACAAAGGCCGATA
28654	11	46.3709	AATTCCGACAGTTATGGATGAGCAAGCGGTTAGTAACTATTAGTTATGTTTAGTTTAAAGCCTCAATATAATGTTTTTATAGCCGTTTTCTACACAACGACCTCAAAGGATGCCC
28661	1	83.8607	AATTCAGATCAGGAGATAACATGCAGGATTGAACAAACTAGAACAACTTTCCTAAAACTTCGAAGATTTCTCACAGATAGGAACTTGAACTTAGATGCATAGTAGTGAAATGCTT
28662	4	3.46806	AATTCATGTTCTCTAGTACAAGAAATAATTAAACTTCTTTAGAAAAATAATTTTGTCTATACATTTATATTTTCATAATTTCCTTGATTATGATACACGTTTCTTTTTTTAAAAT
28722	9	37.8637	AATTCAAACCGTTGACTCTTATGTCAATACAAATGAACATTGAACCTCACAATAGAGTGCCTTTGTTATTTTTACAATTTTATTGGGGATCCCAGCTCGACTGTTTATACGTGTT
28747	3	116.72	AATTCAGAGCTAAAGCCGACCTCATAAAAACCTACCTGGAAGGAATAAGAACAGCAAAAATTAATAAGAAAATTAAGGATGTCCTAAAAATTCTGAAGATTAATGAAGGTTGCAC
28797	1	16.6226	AATTCCAAACCTAATTTATTTCAAACCTTATTTTCTGTATATTTTTTTCGTCAATTTTCCCGATATTTTAATAGTTAATCTGCTATTCGTAGAGGTAACTAAAATTAGGCTTTGT
28856	10	1.90038	AATTCGAATAATGAATAATCACAAGACAAGTGACATCTGTCTAAAAAAGACAGCGATTTAGTTTTGTAAAGTTTTTTTAGTCACCAAATTTGATTTATGTCAATGATGACATGTA
28861	8	7.81082	AATTCATCCAGAGCCAGAGCCATAGACCTTGTAAGATTACTAACATAGCTCTCGTCAGCTTCAAGAGCTTCCTGGAAACTTTCAAAATCCGTCATCCAGTCTTTTGCGTAACCTG
28904	11	47.3339	AATTCTACGGAACTACAAGACAAAATAACACAAATTGAGGACGATGTAAACAGAAAGATAGAAATTTTAAAGGAAGAAATAGCAAAGGCAAATTCACCAAAATGTCAAGAAACAT
28910	3	150.52	AATTCAAAACTAGGGAATCAGTTGCCGAGAAAAATACCAAAGAAACTAGTAGTAAACCAAAGATAAGTGTATTAACCAATAAGAAATTCCCGTCTTTAAAGACAGAAAAACATAA
28926	8	19.0034	AATTCTTTTGCTAATATATTTTTTTTATTTACAGGTAAGATCTAAAACTCCACAACAAACGATGGTCAGCTCTATTTGTTAAAACAAGTAGACGACTCTCAATCAGTTATTTGTA
28984	7	51.6509	AATTCGTTGTGAAAAGAGTGTTTTAAGCACTCGACGCATTGTCCAACTCGGTTTTCGCCTCGTTGGACAATTTTGTGTCCCGTGCTCACTACTTAGAACCTATTTGAAGACGTAA
28993	8	53.0594	AATTCTCCCACGTTCTTTTCCGCAACTTCACAAGTAATTTTGAGGCCCTTTTAAGCATCGAAAGTAGATCAAGACAAACCAAAATAGATCAACACAACACGAAATAAACGGAAAC
29040	8	162.067	AATTCACCCCATATTTTTTATGTGCATATTAAATCCGTATCTCCAATTCATTTCGCTCATTCTCCTTTCGCCTATTTTTTCCGAATAAATGTTTCGGCCGTAGTCTCGTGCGCAA
29120	8	21.4092	AATTCTAATAACACAAGTCACAGAGAGAGTCCCAGAATGCATTTATCATCATAGAAATCGCCCTGTATAACAACCTAGTTAAATTAAAAATATTATAAATATATCGATATAACAG
29193	5	102.514	AATTCAATTACCTCCGCAGTTTGATTTCGGAAAAGGCCATTATCGACTCTGAAATTCAGTACAGAATTAGCAGCGCCTCAACAGCATTCTGGAAATTAAGACAGGATTTTCTACA
29197	1	30.6897	AATTCACCAAGGGAAAGGGCACGCCAGAGAAAACCTCGCTCTTAATTCCAAGGAATCCAAAATATTGTAATAATTAAACTTAAGTATTGTCCCCCATACTAAGGTTTGTAGTTCC
29213	8	81.6058	AATTCTATGGGTGCGCGTACATCGTCACCATCAAATTAATTTATGCAAATAAAATCAAGGCGACATGGTAATGAAAACGATAATGATATAAATAATTTGTTTGTAAACGCGGGTT
29231	6	108.958	AATTCCATGGCACACGCGACAGAATTTCGGAGCGCTCGCTGCGCGCTGCCTGTAGCGTCGATTGTGAATTGCCTCAGAAAATGATCGATGTACAGGGTGATCAACGATAGAGTCC
29251	8	48.4349	AATTCGGAAGTGCGCTTAGCACGGTTCTAACGTCGTTTGTAACGTTAATGTCGGTGATTATTGTGTAATAATAACAGAGAAGTACGGCGCAACAGTTAGCAGAAAGCTTACAATG
29307	8	133.957	AATTCAACCAAGAGATAAGGAGGCGGTAAGTTCTGTAAATATTTTTGGATTTAATTTTAGTCCATCACCAATTTCCTTCTGATGCTTTACCATTTCTACTTAAAAGTAACAGAGC
29324	3	15.2697	AATTCTGATTGAGCTGATATTGCATTATATTCTGTAGGTACATCTTGTTCAAGGTAAATAAACGAATCTTGAACTATAACTTCTTTGGTTTCGATGTTTTCTTGTGGCAGTAAAA
29330	6	66.1391	AATTCAAGCGGAACCAGTCGTTGAACAACCACAGAAACTTTGTTTGCGGCCAGATGAAGAACCGCTACTGCGAGATGTGCAAGTCGTTCTTTTGGGCCACCCAACAATTGGTCGA
29345	3	153.52	AATTCCCCGTGTTTATGGACGACACTGGTGTGTGCAGCTATGAGCAACTTTCTGTCGCAGTGTCCTTTGTCGTGGACAAGAATGATGATCTACTTTACCTTTAATTTCTGACTTA
29399	4	41.1441	AATTCGTAACAGAAATACATTTAAAGACGGAGTCGACTACTTTTGGATTATTTCGAATTTTGAACCATTACTCCTGAAAATCAATGTTGTCTTAAGCTTGATTTTCATGCATCCG
29404	3	78.2996	AATTCGGGCAAACGTTGAATGGATATTAGTGGCGTATATCGGGTGGCATAGTTTGAGCCAGTGCGCGCTTAAAAAATCCTGCTGGCCGCCGATTGTCGGCAGCGAAAAATTTAAA
29406	8	109.79	AATTCATATATTTGAAAAGTTTTTGTGCCGAAAGTTCAACCGAAACTGTTTTATCATAATTTTTTTGAAGAAAAATTCATGATTAATTTAAAAAATAAAAAGTTCCCAAATTTAT
29424	7	25.5646	AATTCAGTGTTCTGAGTACAACGATATGCCACACTTTATATTTTTTTTTCGTTTTGGATACTTTAACAACAACAAAACTGTTTAATTATTATTCAAAATAATTTCCGTCCGACTC
29432	3	10.8261	AATTCAATAGTTCAAGGAACTACTCGTCTGGAAAAACTAGAACTAAGGAACTAGGAACTTCGTGAATCAATACCTTTATTAAAAATCGAATGATAATGTTGAAACAAAAACATAT
29502	5	11.2246	AATTCACCGAAGCCGAATCCAACATGAACGATTTAGTATCCGAATACCAACAGTACCAAGAAGCCACGGCTGACGAGGATGCCGAATTTGACGAAGACCAAGAAGCCGAAGTCGA
29503	10	0	AATTCCTCGTTCATTTTTATGTCGTTAGCATTGATTTTGTGGGTGAAAAACGGCTTATATGGGAATGATGCTGACAATACTGTATATACAGGGTGTTTTTAGGGTTCCGTATCAC
29546	5	190.678	AATTCAAAGAGACATATTTCTAATGAACCTGTAAATGATTAAATTGACAGTTCCTATAAAAATTGTTTTAAAAATTGGTAAAACTTCTATACAGACATAGACAAAAACACGCTAC
29550	10	19.3704	AATTCAATTACGGCAAATCTTCGTGGAAGAAAAAGAGAAAGGGAGAAGAGAACGAGAAAGATCCCAAAATTGCCACTTAATTGGATTCTTGCGAAATTTTATTTCGAACTTATTC
29600	10	45.16	AATTCAGCGAGTAAACAATAAATTTTTCCATTCGCACGGGAAGTCTGTATATGACGAGCTTTCAGGGTAATATATTACGTGGATTTCTAGGGATTTGGACTCTTAACCGTGCACA
29611	2	65.9466	AATTCCTTCCAACATCTGAAGATATGGCAACAAAGCATGTTGACGACCTCACAGCGAAATAGCAAAATAGTTTAGGGTCAAGCTCACTCGCCAAAGATGACCAAAACGACTATAT
29643	1	65.353	AATTCTCCAAAATGTTCCCCTATTAAAAAATCAAGTAAATTATGGAAGTACTAGCGTGTACCAGCGACTTCGTTCGCGTCGAATTAATCATTTGTAATGGTGATGATAAAGCAAA
29654	8	46.0184	AATTCAGACCGAATGTATTCGCCGCCTAATTTTTAAACTATGTAAAATAAATTAATTCGACAGTCTACCAGCTTAACTTGATCTAATGTGAATATTTAGCAAGGTGCAAGAAGAA
29732	8	145.75	AATTCAAAATTAGATAGGTACAAATTACTCATCATATGATATGTATACACAGATAAAAGAATATATAGGTGCAATTTTAAATAATTTCTAATCGTGAATTATGAAGCTAATTTGG
29765	10	15.5087	AATTCCATGCAATATGCAAGGCCTGTATAAAAGCTTCTATGCTAATTGACGAATAAAATAAGTAAATCCCGTACGGACAAATAGAAAAAGGAGGAAAATATCGAGGATGACTGAA
29802	4	58.8608	AATTCTTAGCCCAAGTATATAATGGTACGTACACATTGGAGCGCTGCGCCGCGAAAGCGCAGCGCGCGCTCCGAGCGTTGGCCGCGCGTTACTTTTATTGTTTTAACGAACATCC
29818	1	17.7196	AATTCGGTTGTTGATAGCAGTTTCCAGTCTGCCAGAAAGTGGAACAGAAATGGACTTGCTCCACCGCAAATTTCGACGCTTGCGATTAGGGTTATCGAACGATGACTGGTGTGGT
29966	7	24.6028	AATTCGATATGTGCTGGCTTGGGAAAATGGATGTGTTTACCTACCCTTAAATATCTTCACTTTTCAGACATTCCAGCCGTATGTTTGGTGGTAAGGACATAAACGTCCTTATCTT
29985	2	25.5132	AATTCTTAGTCTGGGGATTCTGAAGACTTGAACGGATTGTGCGTTTGAAGGTAGCAAGTTAGTTTGAATGCGATTTCTATACTTGTATTTGAGTACTTCCGAATGTCATGTCTGT
30076	5	48.6221	AATTCCGAGATTTTAGTTTAGATCTGCGCCGCGGCGCGCTGGTAGTCGTTTACAGCGCAACGGATAAAGAATACTCTACCGTAGGCATTTATACATTCCGTACATGTATACGGTA
30097	9	1.94022	AATTCGTCAATCAATCCTGATTTATGTCATATTACGAGCCCTAACAACCATATATTGGGACAAGATCTTTTTTTGCAATAAAAATAGTAATTTGTTAAAACGACTCAATTTATTT
30122	6	36.151	AATTCACGACAAAAGGACCTAAAGCTCAGTCCTTACAAAGTGTGCCAGTAAAACAGTCTAAAGTGAAGTCAGTAGACCAGATGCAGCACGATCAAGATTGCGACTGTCCCGTTTG
30126	8	190.793	AATTCAATGAAAATATGCATGAAATCAAGGTTGGTACAGTATCAAGTTTATTATAGTGGTTTTCTTAGCCGCGTATGGCACAGATCGTTACCCAGTGTTGCCAGAAGCTTATTTT
30139	10	55.902	AATTCGTGTATTTCTTTGCTTGCGACGCGCAGTCGGTCGGGCAAAATGAATTTTAATCTCGTTTCTCGCGAGCGAGGTGTGTTTGTAACGTTCGGCTTTTTAATTTTTATTTTTC
30156	5	30.569	AATTCGGGTTGCATGACGATTCGATCTCGATCTAAAAGAATCGATTCTATAAAAAATCGGTTTTGGATTAATCGATTCAAATAATCGGGAATCGCATGTCAAAAGATCGATTTTC
30157	10	31.0092	AATTCATAAATTCGTCCTATAGAATTAATGCAATTTGTCTTCAGTTTTCATTTGACTAAGAATCCCATTTATTTTTCCTTAATGAAAAAGGGGACCGTTAAACGAGATTTCGCTC
30208	3	52.6179	AATTCAATAAGATTTAGGGTGCCTATGTTTTGCTAAGCGTTTTGATATTTGACTTTTACAAAAATCAGGAAAAAGTACGGGAACAGTGAAAACTACCGCCATCCCTATATACATT
30256	7	77.226	AATTCGTTCTACTTTATTTCCAATGCTTTATATTTCTCTAATTCCAATTTAAAATTCCTAAAATTTATCCTCAGAAATCTAAATCGTCTTCAAATCGCAATTAGTAAAATGCAAA
30310	5	15.6389	AATTCAATATACGAAAAATCCTGAAGAAAAATAAGGTTTATCACAGGAACACATAAATAATATCCGAAAAATAGACACGTAAAAGAGGAAAAGTGGTATGAGGAAAGACAAAAGA
30318	3	2.80963	AATTCTCTCCCATGATAAAAAAAACTCTCTAACCTGCAGCATTCGAGATCTAGTATATAAACTTACTGAAAGAAACTACAATGTTAACTTTATGTGGATTCCTGGACAGTCTGAC
30322	5	56.8825	AATTCAATCAAAGGCAAAAAAATTGATTCGAATTTTGTGAGTGTATGTGCGGCTTTTAACGGGTTGTTAGTTTGCTGGTATTTGAAGTGGATTTTGTAGTGTAGCGTAAATCCTT
30334	8	191.795	AATTCTTTAGAAAGTTTCTAAAAAGATGTGTGCTTTTTCTCTAAAATAAATTCTACATTCAAAATGTTAAAAATAATTTAGATGGGATTTGCTATGTTCAGGTCATATATGCAAA
30353	5	198.027	AATTCCGTTTTAAGTTAGTTTTTACTTGGAAAGCAGAACGGTTTCGGTCCAGTTAGTGGAGTGTTTGCTCTTTTTCTAGCTAGATAGTTTAAATTTTCATTACCTTCTATCCATT
30424	11	49.2579	AATTCCTTAGACGTTTCTGCACTCTCCAAAGTGCCTTATGATCGTCCACTAATGATTCCAGGAAACTCTCCCACCACTTTTCTGAAAAGTTTGAACTGGCTCCTGATCTCACCAG
30461	1	30.1979	AATTCTGCAGTGTCTCCTATTTGTAGATAGATATCGAGATAGATATATTTCAATTTAAAAGTTATGCACAACATAATAACGTGAAGCACAACTTCGGTACATGTCGTAATAAATC
30506	1	65.3529	AATTCTTGTGGATGTAGACACGCAGCTATGAAGAACGAACCCGTCATAGCTATCAAGAAAATGGCTGATGGAGATCCAACGCCGTCTTCACGCAATTGCAAAGCCGTACCAACTA
30511	4	13.7652	AATTCTTTCGTAGTGACAGTTGTCTATCGTTTCAATTCAGAAGCAGATATATTTTTTCTATGCAAGGCAAAACCTTTTGGAGTGCGATTTCTCAAACTACTTTATAAAAAAAAGT
30567	5	60.8967	AATTCAGATTCTGTGGGGAAAATGGGGAAACACCAGAACAACTTATCACTGAGTGCGCTAAGACAACAGTGCATGCCATAAACTTTGGTACTGCCGATGTCGAAGATGGAGAGCT
30584	4	8.3331	AATTCTGCAGGATCTAGTGATCTTGTCCAAGCTGAAATACACAGCAGGAGACGGCAGGATCACATAAAAGTGACGATTTTACTGAATAACATGAGGTAAACGAAAGTAGTTCAAA
30612	3	151.483	AATTCTAATTGCCGAGTACTTTTCATATCTTGCTATATTTCGCAATATTTTATTAATAAATGAAAATGTTACACTTCCGCAAAAGGTTTGCGTGTTTAGAAAAATTTCTAGAATG
30613	6	55.8932	AATTCGCCAATTACGTGTAAATACGCCTATTATTTTCATTATTAGTCTTTTTTTCAGGCTCTTATAATGTAGTAATTATTGTTTATAAAGTGCTAAATATTTTGCGACTTGAGCA
30622	3	46.835	AATTCATCAGTAATCGCATAATAATTCCATACTTTTCCTATTCGACCAGCCCAATATAAGATTAAAATATTCTCAATGCCAAACGACGAAATCATTCAACAATGTATTTCGTTCC
30629	7	66.1009	AATTCTAAAAAATGTAAATCTTTTGATATCTTCAGAAGGTCTAACGTGTATTATAATTTATTATTTAGGGCTATCTGGAGTGTAACGAATTTTTAAAAGTACATAATTATAATTT
30641	2	60.6458	AATTCAAAAGTTCTTTATCATCCCCTTACCCTTATTACTTCATCCCTCAAATTGATTGATATAAATGATCTATGACGCTACACGTAACCAACAAACATCAATCTTCCACATATAT
30650	7	64.1746	AATTCAGTTGTAACCCTGGCATTTTAATTGTAATTGGTAATACTAATATAGAATGTTGATTTACCCTTTCAAAAGTCTTTAATTATGCAGATAAATAATATCATAAAATATTAAA
30716	1	0.496374	AATTCTAAACACTCTAAAACATTCAGGTGCCAGAGCAGGTGAAGTTTCTTGTAACGAAGATGAAGGAGCAGGTGAGGAAGAATTAGGAGCACTTCCATCAGATACTGACGGAGGA
30724	7	106.939	AATTCTTTGGAAATTGTAGATTATACTCAAGGATAAACACTTATGAAATAAAGAAGAAAAAATTCTAGGGATGATTGCTTTTATAAAAATAAAGGTTTTTGAAGTGAAACTTCTT
30727	5	60.8966	AATTCCCACCTCTAGCGTAATATAGCCGCGCGCCGCCACTGCTTATTTCTCACTTTTTTAATCAAAAATATTCTAATTTTATAATTAACCTTTTTTGTTTTAACTCATTATATAT
30796	7	0.972016	AATTCACTGTTTCTACAATAAGCAAGTAAAGTTATGTTTTTAATGAAATCTTTTCCAGGCAAGCTAGCGATGAATATACAATTGTAGCAAATTCATTCAGGTATTCGCAAAGTTA
30803	7	11.0124	AATTCTTCGTTTTTCATTTTCGTTCGACTCTTTACTTGGTGCTTCTTCCTTTTGTTCTTCTGGATTTTCGTCAGATTCTTCTCCAGACTCCTCTTGTTCGCCTTCTTCTTCCTTT
30834	2	75.7259	AATTCTCATTATTATGCTGGTGACGATGAAAATGGTTTTGAGTTTTTAATATCAAACTTTATTACCTGGCCTTATGATGTAGAGCATTACTGAGTAATCATAAAAGTTCAGTCAA
30842	2	90.269	AATTCAAAAAGACCCCGTATCTCTGTTGGCAGTGAAAATATCAACAGACGGTTTACGCCATTAAACGTGTCTCAGAAATCGAGCCCATGACATCTATGTCGATTTTACTCTTATC
30895	9	88.6531	AATTCCTGTTCGTACAGAGGAACTTGTTTTATGAACTGTGTGCAGCACGTGACATTCGTCACGATTAGAAACTGCGAACCTACTATGTAACGTAGACAGGCCAGAATAATAAGGA
30907	7	11.0122	AATTCGGTATTAATATTCTTTTGTATATTTTTTCGAACTATAAATTAGTATGAATGTTTACTCAGTTTCGACAAAAATATTTAATGATGTAACAAGTTAAATAAATTGTAGATTG
30977	11	0.501488	AATTCTAAAGAAAAAATCAAAATAATGAGTAAATCTTGAACGAACCATTGGTATTTTTAACAAACAAAGTTGTAATAGGAAAAAACGGTTGTAATTTTTTGTAATAAGGCGTTTT
31057	5	103.476	AATTCGTTTTAAATATTTTATCGTTGCCTATAATAAGATGAAAAATACTGTAATTTTGGAATCTGGAATGCTAGTACGGTAAATCGATTAGGAAAGGTAGACAACGCTACACCCA
31183	1	38.4631	AATTCATGGAATGCATATGGATACTTTCAAATCGAGGAACCGATTTGCGAGCAGTAACTAGTATCGTATACTGGGTTTTTTTATCTAAATACAGAACTGAGTCGGAGAAAAAATA
31185	9	46.1098	AATTCGCAGAAATTACTAATCTATACTGACGTTTTCTAATCATTTTATCAACTAATACTAGATTTATTTTGCTGTTACATCACCAAAGGTTCCAACCTCCAACTGTAAAAATATA
31205	3	128.47	AATTCCCCGAAAGCAATTGACCGAAAATATAATTACCCGAAAAGAGAGTTGCCCGAAAAGAAATATCACCGAATTACAGAAATACACACAAATTTACCGAAATAAAAATGCACCC
31339	3	41.4847	AATTCAATGAGAAAACGCTAAAAAGATGGAATGGACTGTTTATTTACTTATGAAACGTAACTCTGGCTCTTTCTTATCGCTGCGGCTTTTACACTTGAAAGCTGAACAACTAATC
31350	8	47.7889	AATTCTGATCAGAATAGATAACACCACCGCTATTTCATACCTTAATCGTATGGGCGGGGTAAAGTATAGACACTTAAATGACATTACTTTTAAAATCTGGGATTGGTGTGAAAAA
31425	7	99.1652	AATTCCTATGGACAGGTGTCCTATGGACGGATGTTCTACGTAGGGGCGTAGTTCCCATGTACGGATAGTTTATCCTATGTACAGATTGTCACAGTATGGATGTAGCGTAAGCCCC
31430	4	33.407	AATTCGTTCTTGAGTTATCAGAGATACAAAAATACTAAATTAATAAAAAAAAATAATACGGTTCTGATTAGAAGTTACCACCATCAAATTTAATGTTTTAATGTCCAATAATTGA
31442	5	196.151	AATTCTTTAAAACTACTGTAGAATTTACGTCACATAATCATTTATTAACCTCGTCATTAAATGCTACTTTATATCAATTTAGACTAAAACATTTGTATTACAACAGAAAATTAAA
31497	8	60.643	AATTCTTTGCCCACGTGTCAAGTTTCATAAATAAGTACAAGGAGTTTAAAACATTAATTTTTTTATATTCGCTTCAGAGATTTCAAAAATCGTGATTTTTGGTTGTGAGAATAGA
31591	10	31.5584	AATTCTAGTTCCTTGGGAGGAACTAGTTCCTTAGTTCTAGTTCATCCAGAGGAATATTTTCTTGAACTAGGTCTTTAGTTCACAATAGTTCCCGACTATAACATTGACATCCCCG
31617	8	138.255	AATTCTGGATTTCTCGCGACTAGAAAAAAATTACAAAATAAAAATATTATTTATTTATAAACACTCCTGTGACGGGAGGAAATACACCTCCTGAAACTTTAGCATTCTATGTCGG
31631	5	12.5589	AATTCTGAGTCTTTTTATGTTGAAGAAACCGCCGTGGTATCTGTATCTAATGCACATTTCTCTTTCCTGTAGTTTGCTGTCCACTATAATGGAGAGCGCTGCCTTGAATATGTTG
31638	2	5.54604	AATTCGACATTACTTCTTCTAAATCTTCATGATTCCATGTGCAATAAGCTTGATTTTTTGATCCCTGGTAGTTTCTCAATGTTTCGGCTGAGTCATCCGCACTTTCATCTTGTTG
31673	11	47.3338	AATTCTTTAGAAAATTCCAGAAACCATCACCAGGGGTATATAAGGCCCGCGCTTTGACAGTTGGACAAGTCTGAAGATAGTCTGAAGTCTAAAGATAGTCTGAAATCTGAAGTTT
31680	7	78.6739	AATTCAACCAATGTGTACTACCAGTAATGACCTATGCATGTGAAAACTGGACACTTAAAACTGATTTTATAAGGAATGCTGAATGGAATAAAATATGCTGGAAATAATCAAGAAA
31742	1	47.0674	AATTCAAAAACTTGGCCCATTCAGCAGCAGAAGAAGTATGGAACCTTTCAAAGTATGGACCTTTCCTGTCAAAAATGGGGAATCTGTTTTCCATATGCGGTTTTGTATACACATC
31768	1	3.87659	AATTCAAGAACTACTGCCTGGAACATGCCACCAAAGGCTCCACTTCAGGATACCACATTTTTATGTGCTATTCCAAAGAGGTTCCAGAAAAATTCACTTTTACTCTTTGGGCTAA
31795	3	63.2233	AATTCATCATAATTCATCAAAATTCGAATAGATCATAATTCGTCGACTTTTCCTTTTTAGGCGGCTTGTGTACCTACCTTTTGGGGAGTAGTTTTAGGGAAAAAAATTGTAACAC
31828	5	156.434	AATTCTTGATCGTATTGGGCGGACGCCAAAAATATATTAATATACCTCGCAAGGTACGGCTAGAAAATTTGATCAAATATTTAATTAAGATGTCTGATCTTATATTGTTTAATTA
31844	9	58.7505	AATTCATAATTATATTACGCTGCTACTTTACCCACCAATGATTAATAACGTATGATCTATTGAGACCTCGTATCTCCTATTTGAATAATTCATATTGGATTACTAGTAAAATTTA
31898	3	141.765	AATTCAAAGTGGTTGACACAGGAACGAGACCTTTTCGTGTGTTTTTCTACTCCCATCTGTTTGGATTTCTATTTTGCTCATTATATGTGGTTTGGTTGGATAACACCTGCACTTG
31901	6	107.514	AATTCATGTCCTAAAATGCTTCGTTTCGGAGATACAGGGTGTAGAAGTTTCATTTTAATTTCGTTTTTTATTTTCTCAAATGATAATTTCTAAACTATCGTCGATATTTGAATAA
31990	8	160.509	AATTCCTTTTTTCAATCGCTGATAGAAATGAAAAACAGAACGGGAAGTTGCAGCGAGCATGAAAAGGTTTTGGAATTTTGGAAATAACGAATTTGTGATATAGGAATTACAGAGT
32096	1	10.2418	AATTCGTGACAAAGCTGATTTGATTTCCCCTTACGTCTCACGTGCTGTACGGTGGAGCCACAACTTGTTCTGCAACCAACGCATAAAACACTCATTTTTTTCTCTAATTCAAACA
32127	8	107.244	AATTCGTTAAACAATGGCATATAATAGAAGTTAGCATGAAACAATATCAGCTGTCGTGTAATTTACGTAAAAAAGTCCAACGAGTAACCTACTTCATTCTATTTATAGCTTTCGG
32146	5	106.383	AATTCTATAAGAAACACAAAAATGGTAAAAGAAATAGGGGTTGCTATTTAAAATTTTAGGGGTAGGTGCCCTGGGGGTCAAGGGGTTAAAAGTAACACGACAACAACTGTCCCCC
32155	7	21.1243	AATTCATACTAGATTTATTAAATTTTATTACCTCGAACATTCCCTTAAGATTTTTAATTTTCTTTCGAAGTGATATGTAATAAATATAAGTAGGTACTCTATGATCGACAATCTT
32186	1	42.0211	AATTCACCTGTATAAGAATAAGAATAAAATCTTAAACAAAGGAAGAGCTACAAAAACCATTTACTGCTTAAAAACATCAACTGGCTTTGAAAAATTATAAAAGGATCGTTCCTCC
32193	7	30.391	AATTCGGTGGTGGTAGCAATTGGATCTCGAGACAGAATCGTTGAATGTTTACGAACAGAGGTATTTATGGATTTAAGTATTTAAGTTGGTATATACAGAGTGTCCCAGAAATAAG
32235	8	46.0185	AATTCAGAAGAGCAAACAAGTTATTGGATTCTTAATAGCATCTGGTGGAACCGAAACTTGACAGCAATAACTAAAAAAGACTTGGACAAATATTGGTTGAGTTAATTCTTTGCTA
32252	5	135.412	AATTCACAAGGATTTAAGTGAATTTCTCAAAATACGTAATAATGTTAATTCAGATAAGTGTTCATTCTGGATATCAGTTAGTCTTTCTAGGTATGTCTATTTAAGAATATTTAAT
32304	10	64.5935	AATTCTCTATACTAGAAACGTCGTTATACAAGTAGTATCAAATAATAAAAATCAGAAAAGCTTTTTAAAAATAAAAAGCTTAATAATATAAAACACGGCAAAGCTTAAAAATCAT
32322	1	22.4718	AATTCTTTTTTAGTAATGGACGATGAAAATCCGACAGATGTAACGACTGGTGCTCTCGTTACGGTAATCGTAACTCTCGTAAGGGAGGATATGTCGACGTTGTTTGGGGATGAAA
32347	5	103.477	AATTCACAAGGAGAAACAAAGATAGACTTCTTGCACTTGAAATGGACTATTAGAGGCGTAGCAACAGAACATCTCGCCTAGAACACGTAAGGAATATTTATTTATATAAGAGAGG
32386	8	36.0207	AATTCAGCCAAATAAATAAATCTGATTTAGATCTTAACTAACGAGAGGAATATTAATAATATAACACTAACGCCCCTAGTAAGCGCAGTGTCACTTTCCACGCAAATTTGAAGTT
32404	5	126.487	AATTCTTTTCCTTTGCTTATTTTGTAAAAAAACGCAATTGAACAGAAAAATACTAATATACGTGCTTTTTAATTTAATTTCATCCTCTAACGTGTGAACGCGTTCTTTGATTTAT
32447	6	112.8	AATTCTAAAGGACTACCAATCGCAACGACACTAGTCGCAGGCTGACCAAAAATATAAATCCCTTTCATCCTTCTCAGACCTTTCTCTATGTATTTTGTTGTATGAATAATGTCTC
32494	1	30.198	AATTCATATTAATATTGATTAATTTAAATGTATCATTCTTTAATGCAAATTTATTTCTTTTTAACGCTTTATAATTATTATTTGTAGAATTTAGTGAGACTTAGAGACACACGTT
32538	3	0.0002	AATTCCTAGAGAAGGTGAACAAATTAGAAAAAGAAAATAAAGTCCTCCTAAGGGATAGAAGGTAATGAAAAAACAAACGATCTAACTAGAAAAGGAGCAAACACTACATAACTGG
32546	4	59.6795	AATTCACCTTTGTTCCAGAACCAGGCACCTCCACCATACTATGCGCCTGGACTCGATAATCAGGCCTTAGACCTTCAGTTGGCCTTGGAAGACCAAAAGGCTGTCTACGCCGCAA
32660	7	33.278	AATTCAAATGCTCTTTCAAACTATATTAGGGTTTCTTATACCTATCTAGCTCAGATTTTGAATAAAGAGCAATTTTGCAATAAAATGGCAATCAAGAGGGCTGATGTTGTCATGG
32755	5	114.154	AATTCTTGGAAGAGGCCAAGAACTTGATGAGTAATATTTCTCAGGCTAGTTCAAACACTGTCCCAGCTTGTCATCATCCGCATTTAGATGATTTTGATATCCAGGTAACGGTGAA
32759	5	108.789	AATTCAAAGTTATCTCAAGCTGGCCTCGAAGAGATGTAAGTTTATTTTGCATTTTAGTACTGAATCATAGTTTTCTCATTTTTTTGCATTCAAATTTTTAGTTGACTGTCCTAGA
32793	4	21.1038	AATTCAGAACTGGAATGGCCAGATGCTACGTCTTCTTTGTGTTACTCTATGGATGTGAGTGATGGACACTAAATTTACAGACCGAAAAGAAAATATGTATGTGTACAAACGGATG
32806	6	0	AATTCCCTAGGACCCGCGCGTTTTCAGTTTTGCCACGCTTTTCAGTTTTTAGTTTTTCATTTTTTTGGAGGATGTAAACCCATTAATGCGTTTGAATTTATAGTGTTGTGGTAAT
32943	1	90.1621	AATTCGTGTCTCTTCAAAATACTATTAAGGTTGCCTACCTATCAAACAAATATTTTCCTAGATACTTTCATTTTTATGATTTAGTGACAGTAGATCTTTATTATTTGATAAAATC
32952	11	33.7957	AATTCACCTTCCCCTTTTACTTTTTTTATTATTTAACAAATCGATCGTCTTGATAATTGGTATTGATATATTTTTGGTTATTTCTTCAACAAAATAATTTTTATATATAGATGTG
32956	7	33.2779	AATTCCAAGTGGCGAGAAGAACGAAATAGGGTGTCAAAAGACTTAATCAAAAGCGAACTTGTTATTTTCATTAATGGAACTGAAACTTGCGTCGAATTTTATAAAAAAAATTAAA
32978	7	11.0123	AATTCTACGGTAAGGGTGATGATAATTATCGGAGAATATGATACTTTAACAATAGCAAAGAATATGACGTTAATCAAATGTAATAATAACCATCTATCAAAGGATGAAATCGAAA
33039	10	43.5995	AATTCACGTACCAAATTTTCACAACTTTGAATAAGCCGATTTTAAGTATTTTAAGAAAAACTGCAACTATTTTTAAATTAAATCTGAACTGGTAAAAATGCAGAACCAAGCAAAA
33070	6	44.2999	AATTCACATCTACACCGAGAAAAATATTCCACACTTTCTTACAGTCTACTGTAAAGTAAAAAAAGGGTGTCTTAGGAATCTTTAAAATTGAATGAGTTCTTCTTGAGTTTTCTGG
33076	10	77.2528	AATTCTACAATTTTATTTGTCTTCAGTTGTTCTCATATCTATCCGAACATCCTACATAGTTACTGTACTGACAGTGACATATACAACTCACGCCATTTTGATCGAACACGATTCA
33096	5	220.611	AATTCAGACAACTGCAGATCTTAAAAAGTATCAGGTCATGGTCCCATCTCAGGTTCGGTCTTCCTCTAGGTCTCTTAATTCCTCGTGGGTACCATACTGTAATTTTTGTGGTTCG
33098	8	2.43487	AATTCATAAGCATTTTCAAAACCCCACCCTCCACACCAGAGACACCAACAAAATAACACCAAAAAGAACCAAAACAAGCCAACTTCAGTAACTTTTCTGTCAGTGTCAAGCTGAC
33106	10	0.996973	AATTCTTTTTTACGTGTGACTTCTTGTAATAGGTCTGGGTGTCTATGACGATGGATCCGACAGCGACAGCGGAGAGGATCACACTGATGGGGCCAACAGGGACGGCCAGAGGAAC
33112	4	53.9613	AATTCTACTTAAGAAAAGCAAAACATTATAATTCTAGCAATGCCTATTTATAGTTATCTTACGTATAAGTCACGCTGGGAGATGTTTAATAAGGCTAATTTTCTCAAGTGACTTA
33141	7	6.91917	AATTCTTACACACGAAAAAAGCGCCGTTTTGATGTCAGAAACACGGAAAATAGTTTAAAATTAGGAAAACCAGTGAAATGTCCGAAAATATCATCACTAACGCGCGACGAAATCT
33229	3	174.416	AATTCCCCGTCGGTAACATGCTGTATTTTTTGTGTTCCATCTCTTGTCCGTCCTTCTTGCCAGGTGTCCTGCCCAATTCCACTTGAGGAATTTGATTCGGTGAATGATATCTGTT
33247	6	87.5529	AATTCGTATAAGCCAAAGAGGTTTGCTATTCTCCTTAAAAGTAAAAATTATCTTTCTAAATAAAAAAATTAATAATTTAATTAATTTTTTTTAAATTTAAAATTAAGATTTTTTA
33319	6	15.523	AATTCGTTGTGATATACAGGGTGGCGCCTCTCATACGCCGCGGAGGCTCCAAGGAGAACGACAGTTTGTATTGAAATGAAATTTTGTGAGCTTATGTAGGTTAATTCAGAGCACT
33446	5	68.5697	AATTCGAAATTTTGACCAAAACACGTTTTTCGTGTTACAATAACATCGCAATAAGATTTCGACATAGGACCTTTTGCCATAAAACCACCGAGTTGTTGACAGTCTTAAAAATTCT
33461	5	182.463	AATTCAAGAATCTGGAAGATTCCATCCATAACCTGGAATGGAAATCCTCCTAAAACACTCGAAGAAATTTCTCAGAACTCACGACCGAGAAAAATCAAAAATTTTCCTTGATTTA
33462	7	24.01	AATTCAAGCATTGTTTGGCCCAGCCTAGAGTCGACCTCAACACTACCAATCCCATCTCATACTGGCACAATCACAAACATTCCTTTTATAGTTCAATAAGGCCAATTGCTAATAG
33562	10	42.1561	AATTCTTGAATCGAAATCTAAACAAAAATATAGACAACAAATGACAACTGTGAAATCGCTTATTCCAATATTCGGTTAATCAGTCATTCATACCACAAAATTGCCAATATAACTT
33573	5	6.53163	AATTCTCTTGGGACTACACGAAGCCATCTCGCGAAGACAATCCCGACTGTCTTCCTTGTCTGTTCATTCAGTTCATGGTAGTGGAGAATGGAGCTAGAGTCTCCAAAATGTTGCA
33585	10	37.3486	AATTCTATGTTTTTTGCTGTTTGTATATTTTTGTAAATATTGTCAATAAAATTGTTTATTTCGGAAATGAGATTTTTTCAATAATTTGCAGGTCATTGAATTTATGAGAAACGTT
33685	8	8.77506	AATTCATCATCATTCCTTGTACTATGGTAGAAGCTTGTTCCTCTAATTTCAATGTAAGCATTCGCAGAACGTAAAAATTAGTGGTACTTTTTCTGCTGATTGAAAATGACTTATT
33713	8	114.031	AATTCTGTAATCTGTAATATAAATGACGTGTAAGTATATTTATAGGACTGTTTTAAACTGGTTCGCGTTATTATATCGCCATTAAAAAAGGATTATGGACTTTAAAACATGTCGT
33728	2	54.8596	AATTCGCCCATTTGGTTGCATATCTTTCCGTATAATTCTTTCAATCAACGCTTATACTCAACTCAACTATACTGACAATATTTGTAGAATTGTATTATTTTTTAGGATAATTCAT
33731	7	67.3064	AATTCTATGACAGACACGGTCAATATTATATGATATTTAAACAATTTAATTTTTGAAATAGATTGCCACATGTCTTCTCTTTATGTCACAGTGGCTGTGGTAATCACTAAATTCG
33762	5	14.4907	AATTCAGCATAGAATTTTGCATATAGTACACTATTTTTATTTGAAGCATTATTGCTATTATTTTTCTTAGCTTTTTCTTTATAATACTTAGCTATATTTTCCTAAAAAAACAAGG
33770	3	151.968	AATTCCAGATCAAAATGGAGGTTAGGTCGGAGTCTTATCAATCGGATTCTTAAAATAGACCTACTTAGTGACCTAAAACCGCAAAAAAAATTTCACCGTACCTTACTTCTAGCTT
33795	1	81.0725	AATTCGTACGGTGGGGACACCAATCGTTCTGCTGTCAACGCATAAAACACGTATTTTCTCTAATTCGGCCAGCGAAGGAATATCGAAAACGGTGTGGATCTGAAAGCGACAATGT
33810	5	118.179	AATTCAATATCTGTTTCGGTGTGTATTTCCATTTCTTTAGTAGGCGGCAGTTGCATTGACTTGTCAAGGTACTTACAGAAGTACCTAGCCTGCAATATTCGTAAAATAGAATTAT
33851	2	60.6459	AATTCGTAAAATACAACTATTTGTAGTTAACTTTTTGACATTTGATTAAGTGGTTATGTAATAAATACTTCGTATTTTTGCTCTCTCTGAGTTACTATTAGATTGCCATAGCGAT
33889	9	11.2574	AATTCCGAGGTAAAAGTCTCTGGGCACTCCACTATAGCACTTATTCAGAAAATTAATATTAATGGCATTTTCCATAGAATATAGAAAACTAATATACAGGGCGTTCAAAAAAAAA
33964	5	37.2056	AATTCTTGAAGCTTCATAGTCATTATGCACTGATGCGGTTTGTCAATGCGTTGATTTGGTGCGCCAATGCATTGATGCCATGGCTTGTGCGGCTGTCAGGAGGAATGTCGGTTTT
33987	2	79.5923	AATTCTAACACCCCCAATGGTTCTACTTCTAGGGTGAAATCGAAAGTAACCTCCTCACCACTCTCTATTTGCTCTCTATTCTCACCAAACTGATGAAGAAATGCAATGAGGAGGA
33989	1	111.357	AATTCTCAACAATTACTTCATAGTGCTCAACTAGAGGAGAAAATGGGAACGGTCTAGGCACTCGCTACTCATCAATTGCACTTGCCCTCATCAATTGAGGGATCATTGTGCAATA
34011	2	8.2813	AATTCTTCCTTTTTTTGGTGGCTTCTTTTTTTTGAGATTCTCTTCCTAAAATTATCAACTTAGCACACTGTAATACAATAAAAATATTCTATATATCTTACAATTGTAAATTTCT
34119	9	0.482711	AATTCCTCAGGACACTGGTCTCCTTCGGTTTTCATTTCTCTAATCTCCAGTTACCGTAACGTATATACTGTCTGGCCGTGGAAGCGACTCGCATAATAAAGCAATAAATCGTGGG
34132	3	159.056	AATTCTACGAAATTTTTGGCAGGGAATAACGTAACCATAGCTGACATCAGCGTTTTATCAAATATATTGCCTAGTAATGTCATTTTGCCCATCGATAATGAGGAATTTCCTAAAC
34176	7	47.3179	AATTCATTGGTTTCCAGGGTCTAGTAGGTACCCCACAATTTTAATAAAGCGTCCATTGATTCTTCCGTCCAGAAGATTATGTATTTTCCATTTTAATCATCAAAACAACACAAAA
34182	1	111.357	AATTCTCGATCAGTCCCTCCTGGGCCGCGAAATTCCGAGCCGAGTGCATCAGAATCTCTTGACTCTTCGAGCCTCTTGTAATTTGTCTTGTTACTGCAGTAATATTATTTACATT
34186	1	1.94413	AATTCTCCATTGAATATCGGAATAGTATACTGGGTGTTGCATTTAAAATAAAAGAATAACTTACTTTTAAAATTGACAAATAATGTTCAGTATTAATTTTGTTTCACCCTGTATA
34206	9	34.4668	AATTCTGTGATTTTCGTCACTTACCTCGGCAGTTTGATTTCGGAAAAGGCCAATATCGACTCTGAAATTCAGCACAGGATTAGCAGCGCCTAAAGAGCATTCTGGAAACGAGACC
34229	9	51.1116	AATTCAGTTTAATAATTATTTAGTCAACATGTTTAGCTTATGTGATGATATGTATTGATAATTTCAATTCCAAATATCTCGAGAACCATTACTCGTAACGACTTTTACCAAGAGA
34233	7	97.7142	AATTCATATTCGTTTTCTGGGTGCTGTCCAATCTAAAAATATACCAAACCGAATACATTTTCATAAAGGTGCGTCCTAAATCCACACCCCGAAAATTTGCCGCGCGATATTAAAT
34283	1	64.6241	AATTCAAAGCCAAGCAAGAAAAAGTAATTGTTATGTGTGTCCATAAAAAAATGAGAATTTTTATTTCTGCAGTATAACGCGTCTCTGATAATATCTTAACTTGTTCAGTACCAAC
34333	7	71.4029	AATTCAAAATTTTTAATTATAAGCAAACTTTTTAGGGACACCCTGTAGAATCAGATATATCAATACAGGGTGTCCCAGAAATAAATTCAAGTATTTTAAGGGGTGGTAGATCTCG
34349	8	36.0206	AATTCTTCTGAAGGGAGGGAAATTTTGGAGTTTGCAGTTACCACAAAAATATATATTACGAAATTTTCTTTGGTTAATATATATTTTTTTCGCTTACGTTTTTTTTCAAGACAAC
34362	8	125.065	AATTCTTTTTGCATTATCAATACAAATTTCCATTATCCTAAAAGACTAAAACTCAACAAAATACAGTTCGATAGTATTCCTAAGGGCGAAAGGATTTTAAATGGCATTCCTTTAC
34424	1	8.30591	AATTCTTTCACAGCGTGTATCAAAAAGTTAGGAATAAGTGGAGTTTCTATTGAATTAAAAATATAACCACAAGGTTTTTAAGAATTGAATTGAAACAAAGACACTAAATAAGTAC
34448	5	126.488	AATTCTGAAGTGTACCTGTTGCTTCTTATAAATTTAAAATGCTAATACTTCTTTTACTTAAAGCTTATTGATATTTTAATTTTAAAATTGGTGTTCCAAATAAATTTTAATAGGC
34456	5	222.555	AATTCTGGAAAAAATAGCATTCATAAAATAGATTATTCCTGTTGTATTGAGGAAGAGAAAATCCAATTCAGTTTGGATACAGATTTAAAATTACAGTTGAGGGTTGGAACCTTTG
34479	8	21.4095	AATTCCAGGAATTTGACGTTTTCAGGAAAAACGCGATTTAGGTTGTGCTCTAATACGTATGGGCATGTTGTTTGAGTCAGAATGACTTTCACTTTCTTTTAAATGATATTGATAA
34518	8	21.4094	AATTCCCATACGATTTTAAAGAGTATGGATACTGTGAAGGGAAATTCGATACTATAAGGCTATGCGCTTACCTGTAATTTTTAGTCGGCCGACTATTTAGTTGCAAAAGCGAAAA
34596	5	82.8168	AATTCTTAGTTATATATAGGGTTCCCGTTTTTACCCTTTGGGTAGGGAACCCTAAAAATATTCATTACAGTTGGGGGGTTGGAACCTTTGTTGTTACAACAATAAAATAAAACAC
34631	5	19.4827	AATTCTTTATCAATTCTATATTTTGGTAATTGTAATTATAAAAGTCTTTAAATATGTATATCAATTTATAATATTGTCAATTTTTTCATGGAATATATTTTTTAGTTCGATCAAT
34684	1	44.6025	AATTCTGATATATTTCCAGATAATAAATCTAAAGGATCAGAAAAAATTAAACAAATAAATAACTCAATGCAAATATCCCTAGCTCCTTACAGATTTCATCCGTTGTATGAGTTTA
34709	9	30.0433	AATTCTCTTGTATTATTGTGTTATAAATAAAATTTCCAATAAAAAAATACTTTGCCAATAAGAATGGGGTAAAAAACAAGATAGTGAAAAGAAGAACAATTCATTCAGAACCGAT
34726	1	45.0917	AATTCAATCGCTGAGTTTGAATCGGCAGTTACAAGAAAAAATAGATTCTATGCGAGAGTTCAGGCGTGTTACAAAATCAAAATCTTACGCCAACAATGATACAGATTAGTCTCCA
34778	1	32.3646	AATTCCGTAACTTAGAAAACGCTAAGCGCTTTTAGACGCTCAGCGTACACGACGTTAATTTTCGCTTAGCTCGCACTTGGCTACCGATTTGGGTATTCGCATTTGATGCGCTTAG
34787	5	136.627	AATTCCTGCATTATTGGTGCGTTTTATAAGTGGTTGCCATATCGTAAATATTTCCGTACTAGGATTGCTAAAATTGTTATTGTTTGCAATAAAAACGGCTTTCATTATTTTTAAA
34914	7	28.9471	AATTCCAAAAAATTGTTTGTTTAGTCGCCATGTTGTGCCCAATTTATTTTTCTTATGTTCAACAACATATCATTTTATCAACATAAATCACTTACCTTAAAAATATAATTAAGTT
34991	3	151.483	AATTCCAATTGCCGAATACTTTTAAAATCTTGCTATATTTTATAATATATATTTTGACAAAAGATAGGAATTAAAAACACTATACTTGGACCCAGACGTTAGGACATTACGCATC
35002	3	134.995	AATTCAATTATCTCGGCAGCTTGATTTCGGAAAAGGCCAATATCGACTCTCAAATTCAGAACAGAATAAGCAGCGCCTTCAATCACATATAGAAAAAATCCTCCCAGCATCGCAA
35016	5	123.718	AATTCGGGCAAAAGACGTCCCAACACTAAATTTGCATCTGTAACAGTGAGCGGCCCACCTTTCTTGTAACAAACTGGTCCTGGATGGGCGCCTGCTGATTCTGGACCAACCACGA
35059	5	95.2902	AATTCAGTGATTGTTAACATTTAACATTCAGTAGGAAATGCTAACAATTACGCATTGGACCAGTGAATATGGTATTTTAAAGAGATTTGTCGACGTTTCCTAGTAATTTCTAACA
35088	1	16.6224	AATTCCTTCCCAGATAGCATCTTCTTCTCTCTATCCTCCGTCCATCCGAGACCCAGTCTTCAGATAAGTGAAATCCCAGCGGAGGTGGCGCCCGCTTCATGATTTAGTGTGACAG
35089	8	19.0035	AATTCTCTCAACAGATCCCGTTCCAAATCGCCATCGTTCTTACATGCCGACACCAGAAGATCAATCAGTCCCAATTTTCCTCGAAAAAGCTTGGCAGCACCTCCCAATATTAGGT
35128	10	74.7942	AATTCGTTATTCCGATATAAAATTAAACTTTTTTAGTGTTAAAAGTTAACAACCACTGTTAAATTTTACATAAAGTTAAAGATTAATTTTTTCTCTTCACTTTAAAGTACACGGT
35150	10	55.1154	AATTCACATTTCTTTGATTTTAAATAACACAGAAGAGTTTTTTGATGTTGAATAATTAAAAGAAGATGCCTACAGCTAAAGAAAGTTAGTTATTTTCCTTTTTACATGAAACCAT
35198	1	23.4428	AATTCAGCCATATCTGGTAATTTTTCAGTAATTTCGCCTGCTAGCTTTTCTTGCAGCTGTTGTATGGTTTTAAGCAATAATTCTTTTTCGCGTAAACTATTCTCCAAACCTTTCT
35223	9	23.1538	AATTCAAAAATCGATACCTCGAAATCAATTAAAAATTATTGATTGTAGTTTTTTCAAAAACTTTCTTAACATTTCTGCTATATTTTTTTCACAAACAATATGTGAAAATCTTATC
35229	7	68.032	AATTCGTGACAAGGCTGATTTGATTTCCCCTTATGTTATGTGTAAACGGGGGTTTAGAAAAACACTATTTTTTTAAAAGTAATACCTCTATTTTTTATATAAAGTACTTACAAAT
35230	7	60.804	AATTCCATGTAAATGATCGTAAAAGTCGACTGGCTGTCTAATGAATAGGGTTTGTGGTTTAGGTCACCTACAACAAAAATTGTAAAATACTTTTACCGTATGATCGAAAAAAAAC
35256	5	19.4823	AATTCGGAACATTCCAAGAATTTTTGGCATATAATTCAGTCCATGATTAAGCGAGTCAAATAATATATCGTATTGTTGGAGATCATTTGAAACGGTCTAATAATTTTAGAGATTT
35286	3	159.056	AATTCTAGTAAGGTTCTTCTAGACAAGAATAGAGATGGCAATGAATATCTTACATACGTAAGTTCTGTTTTGTGACTTTTTATTAACCTTTATAATAAATATTTTAATTATAAAC
35323	9	45.6271	AATTCGTCCATTTGGTTGCGTATCTTCCCAATTCTTTCAATCAAAGCCGAAACGTGGTGTAAGTTATAATAAATGGAGGGAATGGAAGTCCAAAATTCTTTTAGTATCAATACTG
35329	1	0.496274	AATTCAACAAATAACCTGTGGCTTTTGCTGAAACCTGAAACGTCATAAAAATAAAATAAATAGCTTTTATTTTTTGTATTCCACTACTATTTATCACAATTCTAATTAGAAAAAG
35413	2	86.3641	AATTCAAAAATCGAAATCTATTAGAAATAATAGTTTGTAGTTTTTTCAAGAACTTTGTTAATATTTCTGCTGTATTTTCTTTATAGACAGTATTTGAAAATCTTTATCAATAAAA
35453	3	52.6184	AATTCGACCATTAGTTTGCGTATCTTCACTATTCTTTCAATCAACGATATTATGCTACATTCACCCAATGTATTTAAGGCATTGTCACAATCCCACACTATAGTCTAGAATTGTC
35458	3	140.116	AATTCAAGTTTGTGCTGCCATTATAGGTGACTAAATATAAAGTCAAATATTCATCAATCCAAAATGGCCAGACATACTTGCGGTTTTTATCAGGAACTTTATTCTAAATTCGGCA
35479	6	61.0249	AATTCTATAAGGGATACCAAATAAATTTTTAGTTACGTCATCGAGGGTGCGGTTATTAAATTCATTGTTGCCAACCATAGACATATGCAGCGCAGGACTAACTGGAATTTAAGTT
35481	5	156.434	AATTCAAGCAACCGAAACTAGTTCTGGCAATTTCAATGAAAGGAACTTGCTGAACATTGCAAAACTCGACAATGCCCTGAATAATTTATCAAACGCCATTAATAGATATTGCGAT
35509	8	81.6057	AATTCGTATCTCTAGTAGTTTCTGAAGCGCCAATGTTGGGCATCGAAATTGTCACAACCAGGGTTCGACAATAGTGCGTCGGGCATCTGCAGCTCCAAGAATAAAAAACCTGATA
35566	9	39.314	AATTCTATGTTTTTGGTGGCATGTTATACTCAAGTTATATTCCAGACACATTAAAGCTTTATGATTCTACTTGATTAGGTAACTGTCATTACGTAGTGTAAGAATTATTTAAATA
35582	5	19.483	AATTCTTCTTTAAATGTTCTTAAACTTTTTGGAAAGTAAGATGGATACAATTTAAACACGAAAATATAGTATCGTCAGATTACTAGATTGACTTTAGTATATTTTGTTTGCTATT
35653	8	142.651	AATTCTCTTCAAAAATTTAAATTAAGAATAAAACAATTTTCTCGAGAAATCGTTAACAAATCCTTACCTAATACTGTGTTTTATTAGAGCTGAATAAAAAGATTTGTGAACCGAA
35657	7	79.6947	AATTCCAACTATGGTTTTTACTGCCCGTATGTCTTTTTTTTGGCCGTTTATTTTGAGCTCGATTCATTTCGTTGACGGATGATATCAATGTATGTTTCCTTCTCTTTTGTTCTGA
35727	2	36.137	AATTCATTCTTTGATAGATTGTTATCTTTAGAATTTTAATTAACGTCAAATTTTTTGCTGTTTAAAAATATTAAAGAAACACAAAATTTATTTAGTTGAATGCTACGGAAAGGGT
35765	11	2.43426	AATTCAATCAATCCAAACACGATTCCATTGAGTCCTGAGGACGTTCACAACTGCGTGATGGGTTTTGTTGTGGAAGTAGTGATATATTCTACGTGGGGTGATACATATTATTGTG
35770	9	8.84951	AATTCTCTGACTTACTTTTTTAAGTAGTTTGGATTGTCAACTACTACTAACTGTAAAAGGAAATATTGGAAAATAAGCCTGGGGGTGACATGCAATTCTTAGTCGGCCGACTATT
35849	2	55.9068	AATTCACAATCAATTTCCAAAAATCATATTTGGAGGAGCAAAAAACGAATAAATGTATATTTTATAATCAGGACTATGCTAATAAATTTGAGTGTTTTCGAAGTATTATACAGGG
35875	5	136.627	AATTCTTCAGAGTAAATTCTGAAAGCGATTTATGTTTAAACGACATTGTAGGTATATACAATACGATCGAAAAAAAAACGGCGTCAGAAATAGCTATGAACTGAAGATCGTTGCC
35920	2	83.958	AATTCTCTTAATTGATTACTTAGATTTTCTGTATTGTCCAGAAACTTTCGCAGTGCTTGAAACCTCTCCTCTAACAATACTTCCTCGAACAAGACTTTTCGTACTTCAGGCCGAT
36038	8	122.38	AATTCGGAGGTAATACCCTATTTTTATCCTCGCTTACTGGCCTACTAAGTAAATAAAAAGGGAGAATCTCTTACCTCCTCTCTCTTCACTCTCTTCAAAACTTTTTCTATGGGCC
36084	5	134.001	AATTCTACGTAACAAGATGCTTTGGAAATGTTTTCATAAAAATACAAAATTTTCTATAGCAAAAAAATTACAGCGATTTGTCAAAAACGCACATTTTTGAAAAACACCCCAACCG
36174	4	9.29957	AATTCATAACACACTAGTTTGTTATAACTTCAAAAACTCATCATCATCATCGTCGTCATCATCACGCAGCCCCCTTTCACGTCCATAGTTGAACATAGGCCTCCTCCAAACGTCT
36212	2	4.44502	AATTCGGGGCAGTACTTCGAGGACATGGTGGCCAATACAGACGAGCTGGACTACGGGCTATCGTCGTACCTCGAAGACGATGTTTTGGACCAGGAACTGTCGCCCGACAACAAGA
36289	7	71.4028	AATTCTCAGTGCAGTTACTTGGAAAGAACTGTTTTTGAAATGTGCTTTTAAATTGAAACGGCGTTATTTAATTGGTATATTCTGAAAAATGTACGATTTTTGAAAATGAGATAAA
36452	5	136.627	AATTCCTCCCTGTCTTGGGCCAAACGGATAATTGCCATGACATTATAATCTTTAGTTAGACATCTAAAAAAATATATCTGCAGATTTTATACTCTATACTTCCATGACTAGTACT
36475	9	41.6576	AATTCTGATATCCTCAAAATCTTGATTTCCATAAGCCAATAAATATCTAATAATTTGACCTCGACCGTTTGTATCGAAATAGTAAAGTTTGTACGTTGTTGGGGCCATATTAATT
36513	5	165.682	AATTCCTTTTTCCCGATACTTAGAATTACATTTTCTTCATTTGTATACTGCAATTTAGTATGGTCATTATTTTTGGTATTTTGTATTCTAGATTTTATCAATCCGTCTGTTAATT
36547	8	19.0033	AATTCAAATAAACGAATCAATCTTCAGACTAGTAAAAAATAAATTATAAGACAGTTATAAATAAAGGGTGGAGGATTTTTTTGTCGCGGAGTGTACTTTCCGTTTTCTTGTAATA
36589	3	2.21962	AATTCCTATTCCAGGTTACGGATAAAGTCTTCCAGGTTCTTGAGTTTCGCTTTAAGATGGTTTCGACTTGGAAGGCAGGACGCTTCTGGTCCAGTTAGTGGAATGTTCGCTCTTT
36594	4	76.6335	AATTCGAGAAATTATACGACTCAATCGAACAATAGCTGATGACATAAAAACGAAACAATTAATATAGCATGGCCACGTACAAAGAATGTCAAAGGAGAAACTTCCAAAACAGATC
36663	5	98.1781	AATTCTTTAATTTAGGAGGATTGGTTTTAATAACCCACCATTCTGTGTTTAACTTCAAATGAAAGCATTTTTGAGATAAATCTCGAGACCAAAAAATTTATTAGGATACAAGTTC
36684	5	228.57	AATTCTGATAACGAATTTAAATAAAGATCTTCAATACATTACAGAATTTTTACAACTAAATAATTTTCCACCAAGGATATCTACTATAACTGCATGTCTTGTGCAACTCTTGCCG
36741	8	31.0616	AATTCGCCAGGGCAGAGACAAGCGAAAAAAATCATGATAGAACATTCGCCAAAATTCACGAAAGACCTGATAAACAAAGGCAGAAAGACAGTTAAACCTGTAGTGGGTCTACTAA
36779	8	113.558	AATTCATATATCTTCAATATTCTATTAAGGTTGTCTACATCTTGGACAAATATTTTCCTAGATATTTTCATTTTTATGATTTTGCGTCATTAGATCTTATTATTTGATAAAATCT
36822	3	166.138	AATTCTTTTGCAAACTCCTACCACTTTAAATATAGATCAAATTGAACCAAAACCAAAACAGTATTATTTCAATTTTATGAGGTTATGTTTTGTTTTCTGCACATTTTCTGTCAAA
36906	1	65.3526	AATTCTTTTGGATAGAAGAATCCGCCACATAGGTATAGACATTTTTAGGCTTATTTATTTTATGAAACTGAAACGACCCAAAACTAGGATATAGACAGGAACAAAAGAATATTTT
36979	7	52.1318	AATTCTCAGTTCAAGTTTCGAAGGTCTTTTCAAGTTGTTGTTCTTGCTACAGTGTCAAATTGTATCTGTATACCTGAACATATCTTTGAACTTTCGAAATTGTGAGACAATACGC
37061	10	40.2316	AATTCCCTGACTTGGACTGTGGAGGGAAATTCGATATAATTTTTAGTCGGCCGACTGTTTAGTTGCAAAAGTGAAAACAATACATACTTATGAAGTCGATCGGCCGACTATTTGA
37091	8	50.6368	AATTCAGTAACCATCAATTCAAAGTTGGTTAAAGAATGTCTAGAGAAGCTGAACAAATCAGGCAAAGAAAATAAAGTCCCCTACTCTAGGTGACCACTCACCAATGTATAGAAGG
37140	5	156.434	AATTCAATTACTTCGGCAGTTTGATTTCAGAAAAGGCCAATATCGACTCTGAAATTCAGCAGCACCTCAAAAGCATTCTGGAAATTAAAAGACAGGGTTTTCTACAATCATGAGT
37161	5	84.9924	AATTCCAACAAAGCTGAATTTTGGTAGACCTTGGTTTTACCATTATAAAGAAGAAGAAAAAAGTCCATATCGATCCCACGTCTGCTAAAAAAGTTATTGAAGGTCAAATGTCATT
37164	7	34.9616	AATTCATTCTTAAATTTAAAATTCTAAATTACAGTATTTAAATACAAAATATAATTAAAATATTTCGATAATATTGGATATTTTAATATTTTTTAACTATTTATTGGAATGCATT
37264	5	112.862	AATTCATATTAATTTAAAACTTCAAATAACAAGTCAAATAATAACTTTGACCTATAGAACTACTTAGAAGTTATAACTCCTATTTTATCTTGTGTTGCTTTGCATCCATTCAGAA
37322	9	27.1146	AATTCACTCATTTGCGCAATGTCCTTGAGGAGTTACTCCAGCTAGCATTTAAGGAGTAAATCTAATAATATTATTTTCCTTTATACGCGATAACAACGACTAGTGAAACATACAA
37439	8	110.271	AATTCAGTGGTACAACTTTAATATTAGGATGCATAAGTTGTTGTGGTATGATCGGAGCTTTCTTTTTCAAGGTATCTATAATAATTTAAAATATGTGTTTTACATTTTTTGCAAA
37493	3	134.229	AATTCTATAAACACGTTGCAGACGCTGTTTTGCAATATGATTTATACAAAACAAAAGTAATACACAGCATTTCCATAGTTTAAATGAGATAATTTAAGCCGATCACACAATTTTT
37506	4	44.998	AATTCAGGTGGTAACTCTGCTGTAAAAAATTTTAAGTTGCAACATTTATTTATTTATCTCCTGACATTGTCATTTGTTATGACATTTTAGTTTTGTATTACGAGTTTTTGGTTTA
37524	9	10.7756	AATTCGTTTTTTGTTTATTTCTGTCGTGAAAGTAACTACTAGAAAATTCTCTGTTAATGTCAATAATAAATATGTAAAAAGTAAAAATAAATATGTAAAAATATGTAAAAATTTA
37564	6	63.5881	AATTCGTGGACCACACAGGACGTAATTTTTGAACAAAATCCAATTTTGTTTTTTTTTGTTTTTATGTCATCTCTAGTAAAATTCAAATAAATTAATTCAGATGAAATATAGCAAA
37613	5	106.382	AATTCAAGAGAGAAAATCAGGAAGGGCTGGAGCAGTAGGTATACTGAAATATTTGCCAGTATTTGGTGTAAGTAAAAAATTAACAGCATGTTTTATTCGTATAGCTAGATTATTA
37654	1	93.7727	AATTCAGACTAACCATTTGTAAAATAATGTAACAACTTTTTATTAAATAATTATAGAAAATAGGATAATTGTCATATATTTCTCCTATCTTATCTTTAAGTGTTTTTAATCGTTT
37662	9	49.0135	AATTCTTGAAGTAAATAATATTCTAAGTGCCAAAATCATTATTTTTTGTTACATAACCAATATACATATGTATACAGGGTGGCGCCTTTCAGACGACGCGGAAGCTTCAACGAGA
37701	1	23.4427	AATTCAATATATAAAACTTCAAAATACATAAATATTTTAAAGTGCCTGTTTTTTGTGCCGCTGAGTGTATATTCCTCATTCACGCGCGATACGCAGACTCTTTTCAAGAAATGAA
37707	5	105.414	AATTCAATAAGAACACGCTAAAAAGGTTGAGTGGACTGTTTATTTACCTATGGAAACGTAACTCCTGGCTCTTTCTTATAGCTGCGGCTTTTACACTTGAAAGCTGAAGAACTAA
37745	11	0	AATTCGATGTCGATATTTAAAATAACAACTTCCTTCGTCCACTCTATAATTTCGTATCTGATGTCCATTAGCTGTAGCTCGTGCATATGTATCGAAACAGTCATATATTAGAGTG
37771	1	89.5553	AATTCTGGTTTTTTACTATCACTGGCACTAGAAGGTAAATTGATGACTAGACTGGTTGTGGCCAATACACTGTTGTCGCTTTTTCTGGTAGCTGTAAGCGTGATTGGTAGATTCT
37807	5	41.4534	AATTCTCTCCCCCTTGTGGGTTCCCAGATTATACAGTTTCCCCAAAATTCGACGTTTTTTGATCACTTGAATCGAAAATAAAAGCGAGCTTAGTTTGCACTTCAAAACATGTATG
37887	7	27.8342	AATTCTCAATTCTGAACTAAATAATATTAAAACTGGTTTGCTTCAGAATGGTTACTCTGCAAAATCCCTAGACAATATTTTAAAAATAAATAAAGACAATGGAAGTCCGAAACTC
37895	6	20.9967	AATTCAAACGTACACAACAATAATAATCATCAAAGCCACCCATTATGAAGAATAACATTAAAAAGTAACGATAATTGAAAAAAATGCAAAATGTTTGTGGCAAGTTTATTTTGCT
37910	11	45.407	AATTCCCGATATTTTATATTAAAACTGTAAAATATTTATTAATATAATTTTTCAATGAATTTTACTGAAAATTACTTTACAAAATGTGGTTGATTATAATTAAATATTGTTAAGA
37912	6	86.263	AATTCCTAGCTAATGTTAAATCTCTTTACATTTGTTTCTATACTACTGATATATGGAAACCTAACCCAACGAATATCCCATCAAACCCATAGAATGTAAAAAATGCCAAGTCTCG
37978	4	76.6334	AATTCTGGTTCCTTAGTTCTAGTTCCTCCAGAGGAATAGTTCCTTGAACTAGGTCTTTAGTTCAGGATAGTTCCCGACTAACATTGACATCCCCGTTGCTTCTAATGGGTTTCCT
38040	3	61.6843	AATTCTGCTTGAAAGGAAGTTCTTACATGAAATATAAGTGTAACTTGAAAAATAAAAGTGCAGCGTTTAATTTTGAATGAGAATGTTTAAAATGCAGCTGATGAAGTTAAGTCAG
38042	5	225.876	AATTCCGAGGTAAAAGTCTCTGGGCACTCCACTATAGTGCATACTTAATACGTTAGGATTATCAATAAAGATTAAAAAAAAATATTTTACTTTTCCCTTGCAGAACCTTTGGCAG
38168	1	91.373	AATTCCTTGGTTCAAGGCAAGCTCCAACATAGCAAACATTGCTGTGGTGCTACTAGTCTCAAACCCAGCAACAAAAAACACAAAACACTGCGCTATTATTTCGTCCATGGTTATC
38194	3	162.712	AATTCTCGTGTTATAAAAAATTATAGCACAGACCTTGGGATCTACCATATATATTCTTATTTTGTGCCAATTAATGTTTCTTGAAAGACTAGATTGTGTTTAGGCTTGTCTCATA
38199	5	182.876	AATTCAAAGAAGTTTTGAAGTTTCAAATAATACTTTTATTAATAAAAAATAATACTGTTTTTACATTGGTACTATTAAATTTAGAGATAAATTGTTTTTAATTGATTTCAAAAAT
38281	5	12.559	AATTCTAAACTCGTCGTCGTCTAAAATCCGTACGCTGCGTACGACGTGTAGTGGCTCTGGTTCTGGCTCTAAGGACTTGGCGGCCGCACGCACCGCCCCGTAATTCTAAACTACG
38296	3	174.416	AATTCACACTACTACAACTCTATGCTAATCTGTTTGAGCTCGGTGCGAAACCGACAAAAAGGTCGAGACGCTAGATGGCGCCGAACGGCGTTAACGTAAGTTAACTGTCACTGGC
38457	5	111.289	AATTCCACAAACTCTCCTCCCAGAAATATATTGGAATAGATACGGGTACAAAAATCACAAATATAAAAAATAGAAGAGGATATAATCTAAAAAAGAATATTAGAATTAAATAAAG
38518	3	92.6255	AATTCTATGCGGAAATGCATCATTCTCTTTTTTGCGACTTTAGAATCACTGATATCAGTTACATGAAAACATATTCCTCTTTTATATTCTAAACATTTTACTTGCGCAGGTAGGT
38531	3	41.4851	AATTCTACATTCAGATGCAAAACAAACGCAACGGAGAAATTTTTCGTCAAATTTAATGTGTTTTATTTTTGTTATTTTAAGCCCTATTTTCACCATGCGTAATAATTTCGTCTGT
38553	5	15.1014	AATTCAAAAGCCTAGCCACTAGTGAAATAAAAAAAGTGGGTTTCCATTTGAAAAAAATGATTTATGATAATTTTTTAATCGCTCAATTCTATGACAGCTGCGGCCATTATTATAT
38571	7	17.2443	AATTCGCGTCGTTTGGTTCGGGTAACTGACTTATTTTATATCTTAATGGGTTTACAAGCCGACAAATTCGTTAAATTTTCTTAAAAAGCAAGGAAAACGTCGTTACGAGGATGTT
38603	8	7.81092	AATTCCAAATTTTCAAATTTTTTTTCGCAAGAAAACCTCATAGGCGTGTTTCTGACTTAGATTAAGGTTTCTGAGGCCGAAATAAACTACCAGTTAAAATACTTGCACTTATTTC
38613	11	52.1443	AATTCGCAAGTTTCGAATAGAGCACCCAAAAAACATATAGAATGGAAGAAATTAAAACTATCCCGAAGCTTTCGTGCAAAGAATTTTTTGAGCATAATTTCAGTAAACTATAATA
38652	10	49.8833	AATTCAATTTAACAGAATTTACAATGGCATACACAATAATTTACACATCGCTGAACATCCACTAAATCTGTTGATATTAACACCTATTTATAGAACTCAAACCCCGCAAATCCCG
38665	7	47.3178	AATTCTTCCTCGGACTGCCAAGGTAGTGTTCACACCCCAATAATTGTAGACTGCATCGATTTTGGTGTCCCACAATTGAAGAGTACTAAATAAAACACAAAAATTGACATTCAGA
38688	3	181.74	AATTCGAGGAGCGTATAGTGGAGCTGGAAGAATTAAATTCCAAAAATTACGACGAAATTAAAAGTCTCGAATCGAACTTGGGTTTGTCTAAAGCCGAGTGCCGACAGTACCAAGC
38722	8	88.2427	AATTCGCAATCCGCAATGTATTTTTTTATTGTAAACCGTTTCAAACTTCAAATGGAAAAAAATTACGTGTTATTTAAATGGAAAACTTTGAATGTTCACCGACACCTTTTAAAAT
38728	5	53.9819	AATTCGCTGTGGTTATCGCCAATCTTCACCTGAAGAAAAAGAAGTACATTGCTTTAATTTCGTGTTCCAAGTGGTAACTAAATATTACTCCATAAGTAATCATAGGTTACGAAGG
38761	5	59.8023	AATTCCCTGACTTAGTTTTAAATAGTTTGGGTACTGTGAAGCGAAATTCGAAACAATAAGCCTATACGCGTTGACCTGTAATTTTTAGGCAGCCGACTATTTAATGGCAAAAGTG
38795	5	185.019	AATTCACTTATCCACTTTAGTTACAAGATCTAAGCTTGTATAGATACTGTAATGACGTCATAGGCGATAGAGCAAAGGTCTCGGCATTTTAGGAGGTAGTGGTTCTTTGTGGTGG
38823	4	68.6046	AATTCACCATGAAAATTCATCATTATTTAATATTAATCAATTCACTCACCTGATTCCATCACTTTAGGTATAGATATTTCGATGGATTTTGATCCGATCATTCTTGCGATCCTGT
38864	5	11.2245	AATTCCCATCCAAATATTTTTTATTTTCCTTTAACGTCCTGTGTTCAAAAGTTCAAAAAATGTAACTTTTGTCCAGTATCGTGAAATCATAGAATATAAATTCTGATACAACTGA
38870	5	177.307	AATTCTATATCGTCTCCTGATCGGAGATAACTCCATCCCTGGCACCGCCGACGCGGTCCTATATCCATCCTATCGGATTTAATCGACCCGTTATCGGATCGGTCATCTGCCATGA
38906	6	32.9911	AATTCAAACAATCTTAATGATAAGTAATACTTAAATAATACTAATACTACGATCTTTTTTACATAAATTAACTAAAAAATTGATATATTACATCGAAGAAAAAACACTATAAATA
38948	11	35.7205	AATTCCTATAATTATAGATGTTACCATATTATTATCATCTTTGAATATATATTATGTAGAGAATAACTGAATAAAACTTGCTGTCGGCGGTTACAGATATGAGGCCTTAAATTAG
38978	3	40.0341	AATTCAGCCTGCTACAACGTATATGTAAAATTTATCCTACAGGCTGCTTTTACTTTGAAAATTCATCTCGTTGCAGTCCATCACAGTTGTATAGTTCAAGAAGCACTAAGAAATA
39007	10	64.5934	AATTCAGAACGTCATTTTACATATGATGATGATCATTTTTTTGTAGATTTTCATTATTTTGTTGCAGTGGCGAAATACCCATATAGGATATTTTTTGGAGAGATGTTAATCTGTT
39027	3	12.087	AATTCAAGATATTTAAGAACTGTAAATAGTTTTTATAAAGATAAATGTTTCGGAATAAAAACTGCCGTATTTCCGCTTAGAGAGAAAAAGCGTTCGAAAGGTAAAGTCCGCGGAC
39034	5	114.154	AATTCCGCCAGTTCCTGTTGCTCGTGTAGAGTTGCCCGTTGGACATCATAAACTCTCGTTGAGGTAAAGTTCAGATTTAATTAGTCCCTCTTTATTCCCTCTATTAACTCCTACA
39145	5	37.8025	AATTCTACATATTTTTTTTCAAGATAACTAAAGAAGTGGAAATTTTGGTGGCGATCGCTTTTTTAAAATGAAGATAGAAGGAGATATTTCATATAACTTTGTCGATTTAGTGAAT
39202	7	26.5268	AATTCCGAGGTAAAAGTCTCTGGGCACTCCACTATCAATAATTAAAAGAAATAATTACTATGAAATACTTAACTTTACTTATACTCGTATTTAATCTGTGCTTAATACTATAAAT
39205	6	105.597	AATTCCTATAGTTGAGACAGTGATAGTGTATATTCCGTAAGCAACAACATGATACATTTTGATTCAAAAACTGTTATAGTCGAGGAATGGGAAAAGTAGAGTAGCTTTGGCGTAA
39219	8	169.07	AATTCAACGATCTTCAAAAAAGGTCTTATGTGATTTTTCACTTAATTGACTCGTTTGAAAGTTATTGAAGGTTAAAGTTCGATTTCAACTGGTATATAATAATTTCCACAATTTT
39234	5	103.476	AATTCATTTTCGTGGAAAAATCTTAAAATAAAATAAAAAAATATAAATCTGATTTGTTCGTGGTTCTAAACAAAATAAGTGATTGTGAAAAAGAAAAGAAAATGTTCTTAAATTC
39282	1	47.5603	AATTCGTTGGAGAGCATTTTGTAGAGCTTGGTAAAATTTATCCTTATCCTCAATTTTAGCATCTAGGGTGGGAGCGTAGGCACTAATGACGTGAGTTTTGTCTGATATGGGGTAC
39291	4	93.2259	AATTCAAATTATTTTTCACTTTTCTTTGAACATTCCATTTAAAATCGAACTGTCAAAATAATGCAATTGGCCGTTATTTTTAAGTAATCATAAAAATGCCCATTAAACTTGATTT
39323	8	145.75	AATTCAGTGGGATATACTTGAAGCTATGTTTTTATATTAAAAAGAAGTACCATACGCACGAAAAGACGGCGTCAAAGACGGCTTTGACAATAAAAATCAATGATAATATTAGCGA
39396	8	96.2559	AATTCGCAAATCCCAATTTCGAATAGAGTACCCAAAAAACAAATAGAATGGAAGAAATAAAAACTATCCCAAAGCTTTGGTGCAAAGGATTTTTTAAGTATAATTTCAGTAAACT
39405	5	126.488	AATTCCTTTTAAAGATAAATAAAAATTATATTAAACGTAAAAATTTACCTCTGATATTTAAATAGGATATTATGCTATTAAGTTATTATTTAATATATTCTTAACGTGCAAGTCC
39488	5	201.017	AATTCAGATTCTGGCGTTAACAAAATAAAGAAACACAAGGCAAAGGAGAAGAACTGGATGAAGTAGAATAAAACGTACTCGAAAAAGTATTTCGTGGAACTAAAGATGATCATGT
39502	3	128.47	AATTCAAATTATACAATTTAATTATCTAACGTTTTCGTTAGAGAGCCATCTTCAGGGATGGGTAAGTGTTATAATTTTTAATTGAATTGTATTTAGCACATAGTGTATCCGAGAA
39533	8	131.526	AATTCTTTCAAAACCTAAAATTAAAAATGCAGCTCCGTATTTACAAAAATTAAGCTAGCCTATGTATCTCACACTTTATCAGATAATATGAGAATGTGTAATTAATTTTTGGACT
39613	5	71.8684	AATTCGGCATAACATTCTGTATATAGTACACTATTTTTATTTGAAGCACTGTGCGGTGTTGTCACTCTATTTCTTATTTACTGAAACTTTCGTTAAAAACACTACAGGGTGTCCC
39634	8	155.244	AATTCAAATTTATGATTTCAGTCTAATAACTAGTCAACATGTTTAATTTATGTCAATGATGACAGGTATTACTCATAGCGATTTTTACCAAGAGACTTTTTTTACGTAAAAAACG
39684	8	26.542	AATTCCATACCAAAGGAATAACGTAAGTATTAAGTCTATTTTTTTACCTTACTTTACTTTGAAATATTTGCTGTAATTTAATAGTTGACGTATTTGAGGAACCTAGTGTGTTCTC
39701	3	141.765	AATTCTCCATTGTATATCGTAATAATACACTGGATGTTCCATTTAAAATGAACAGTACCTTGCTTTTAAGAGTTACTAGTGTTCAATATTAATTTTGTCTTACCCTGTATAACTT
39751	6	15.5232	AATTCAATTACCTCGGCAGTTTGATTTCGGAAAAGGCCAATATCGACTATGAAATTCAGCACAGGGTTAGAGCGCCTCAAGAGCGTCCTGAAAATGAAAAGACAGGGTTTTCTAC
39761	3	171.994	AATTCAAAGAATTGGAACATAAGAATGAAACTGAAAAAAAGAGATGAAGATTTAGTCCTGTAACACAGAAAATAAGTAAATATTTGGCTGTAAACAAAAATACTTACCTATGACG
39786	10	56.383	AATTCTGTAGAGGCAGCTCTAGCTATAGAGATAGAGAGTAATCGTGCACTTTAAAAATACTTTGATTTAATTAAAACCATATATGAAATTTTATATTACTGACTTTACCTGTATT
39799	3	102.488	AATTCTTGCAATCGTTCGTATGAATAAAAAGTAACCCAAAATTTGGCGGTTGTATTAAAATTTTAAATATTATGCTAAAACCCAAAATTTATTTTTTATCGTTTTTAAAACGTCC
39802	5	135.179	AATTCTCCACTAACTGAACCAGAATCGTTCTGCTTCCCAAGTGGAAGTCAACTAAAAGCGGAACCCAAGAACTTGGAAGGCTCCCTCCGTAACCTGCAATGGTCTAATACACTCG
39858	5	42.0646	AATTCTCTCTGGGTAATTTTTTTCTTAGTTTTATAGTTTTCGAGTTGCTCTATTAAATCCAACATACGTTTCTTTAAGTCTTTATTAGCTGCTAGAATTTCAAGCACGTGTTTTC
39969	5	8.11185	AATTCAGCGACCCTGCTAGTTTTCATTTAAATTTTAAGGGAAATTAATAAAAATATTTGTAACAGAATCTCTTGCTTATTATTGTTCATTACTAGTTTATTTTAATAACTTATCA
40124	3	69.9616	AATTCAAGCTATTTTTTAATTTCAATTCCTGAATCGTCGGCGTCATAAATGCAAAGGCTACATCATCGGTGATTTAGAAATATGACGTAAGTTGCTAATATTATTCTTATTCGCG
40285	7	52.6127	AATTCATAGTCAGAGACAAATATTTACCCTCAATTTTATTTCATAAGTAATATCTTAAACTGTTTAGTTTATTTAGTAATCAATAGAAGTGCCCATTTTGAATTACAGTCAGTAA
40316	4	31.481	AATTCCCACCTCTAACCCCCAACATAAAAAAGCAGTATTATTTCCAAAACACAGTTGAATAATGTATAACGAATCTCCTCTTTAAATTAAAACAAATGCCATTCAGGATGTTCGC
40368	7	107.422	AATTCCCATGGACGTCAATTCTAGCCATATTTTCTATTTGCTATAATCGAAGCTCTATCGTCTGAAGTTTTGTTTGTTTTTTCAGTTTAGAAATTGGGGCGGCCTTAATGGATGT
40449	7	25.0838	AATTCTGCAAATTTTCTTTTTAGTTTTGTTGTTTATTTTTTAGTTTGAGTTTATTTAGATTTTCTTTATAATAAGACGTTTTGTTGTCCATACTAATATCAATATAATAGTTTTT
40522	5	18.3635	AATTCTTGTTTGACTGTTCAAGTTTCAAAGCGGTATGCGGTTTGTAGTATTAATTGATCAAGGATCTTTTGTTATTAGGCAATATCCACTCAATAATATTAGTACATACATACAT
40706	8	74.3553	AATTCAGTATCGTAAATGGTGTTTAGCTGGGAGCTGTTATTTCAAAAATATGACTGAAACTTATGTTGTTTTTTTAAATGGGATACCCTGTATATTAGTTTTTGAAGTGAAACTT
40779	5	33.2569	AATTCTAGCTCAACATCTAATGTTATTGATCATTCATCATCTATACTTATGATTATATGTTTTTGTATAGCGGTCCAGTTTCTGTTTGCATATTAAAACTATGAAATAAGACTCA
40780	8	74.8754	AATTCATTTACTGTGAACGAATTTTCATAAAACTGTTTGCATTGTATTGTTAATAAGATATATTACTAAGTTTACCCATTAAAATTCGTCACAAATTCACTTTAGTATTTAAATA
40781	3	124.367	AATTCTGATTTGCTAATGTTGCCAAAAGCAATAATTTGAATAACTGTATGTCTAATTTTTAGCTCAATTAGTAAAGAAACATTCTATTAGTGGTGTTTTGCAATAAACTTTGAAT
40792	11	28.9715	AATTCCAATTAACGTCATATTTTTTGCTGTTTTAAAATATTAAAGAAGCACTACAGTTATTTAGTTCAATGCTACGGAAAGGGAGATAACAGTTATCGGTGAATACTTCAACAAC
40820	7	37.0588	AATTCCGAGGTAAAACTCTCTGGGCACTCCACTACATGGGAAGATTTGTACTTAGATTAAGAATGATTTGCCGTGAATAGGCAGTTCTAAAAAGTTTTCTAAAATATGCAGGAAA
40880	6	38.0508	AATTCAGTTTCCTACAAATATATGAGACGAGATATTTTTTCTAAATAGTAGATACCGAGATATAATTTTTTCTTTCTAATAATACGAAAAAAATAGAAAACTGAAAGGCAGAGGA
40896	4	0	AATTCCGCCACATATTCCAATTGTTCTTCTCCGATTTTTAAAGCATCGTTATGATTTTCCGAACATACAGACATAGATTTTCCTCAATCTTTTTTCGTATATAATATATTTAAAA
41031	8	31.0615	AATTCAGTTAGGTAACTTACTATCAAGCATATTTAACTCGTTCTAACTATTACAGAGATATCACAGCACAGACCAATCATCTCAAATAGGAAGTTTACGGAAGTTTCCTTAGTTA
41050	5	110.708	AATTCCTCCCTAAATTTCAATATAGAATGCCGTGGCTGTGTTAAAGACACTAATTTTTAATCAAGGAGCCTTAGAAAAATAGATTTGATCGTCCAATGTGTTTAGTATCTTGTTA
41054	5	49.1087	AATTCGTTCACAGTGATCTTGCATTGGCATTTTGTGCCATTGGTCCTGTTTCCTGTACACGTCCAATAGGTTATACCGTTGGAGGTTCTCTTGTTAGCGGTGAACACGTAGTTTT
41071	5	9.61242	AATTCTAGTTTTTAGAAGAGAAATGAGATGAAATTGTAAGTTGTATATATTGTATAGTGTCTTCGTTCTGTGTATCCTGGGACTATGCTTTGTGCCTGTATTTTGTATTTTATTT
41180	2	54.3784	AATTCATGTCGACGTGTGAGAAAAACTGCGATGTACGTTTGTATCTCACGCCAATCTCGATGCTTTTTATTATTTAATGAAAGGTTACGGTCATCATTTATTTCCTAAGCAGAAA
41187	9	36.8959	AATTCACTGAGGTGTCGTTTCTTGCCCACCGTCATTGGTATCTTAATTATTAGATATTAATACACCTAGTATTATATGGTTCATTGTCGATATTTTGAATAAAATATTTTTTTTA
41208	3	36.2299	AATTCATCGCTTTTAACGCTGCTTGACTATTAGATAAGATGGCCTATTTCTTGTTTCCGATAGTTCCGATCTAAGATAAGTTATACGCATCTTTCGTAGATAGTCAGTATAATAA
41224	4	8.333	AATTCAAATTAGCGCTAGGGATTATTAAATAAAAAAGACTAAAGAGGGAGTATATTGCCAGACTTTAGCTTGATTTTTATGCGTCCGTTATCCGTTGATACGATGGTCCGATGGC
41275	5	126.487	AATTCGCGAGTTTGTTCGAAGGGCGGCGGAAAAAAATCAATTTGGCGCGGGCAAAAAGGGCGCCGCACTTGCGCAAGGCCAACTTGGCACCTCTGGAAAGGGATGTAATTTTGGC
41325	8	78.4693	AATTCTCTTTAAGACTAGCGTTATCTTCCAAACGTATTAACTTTACAACTAACTTTGGATATTCCTCAACCATACTGTTTTTTGTCGGTATATTTTTGGCAAGATTATCAACTGG
41519	6	115.214	AATTCATAAAAACAAATAAAGCATTTTTGATTGAATTTCAAATATCCAGGCAAAATTTTAAATTATTACTAAAAATATTCTATTTTGATAGGTTTTCTTGCAGGAAAAATAAATA
41666	8	110.272	AATTCGTACAACCAGTGTCCTACACTGTACGTGTTTGTTTACAAAACACAGTATTGAAAAGTTCATGAATATGGATGCTGTCATAATTTTTAATTTTAAAAAGGTGCATAAACAA
41676	1	46.0813	AATTCATGATTTGAGACAATAGAAAGATGATAAATGATATAATAGTGTATTGTAATAAACACGTTTGCGTCCATTTTTAATTATTTATCTTTTCGTGAATCAATAGTTTATATTA
41709	8	9.30254	AATTCGTCAGTCAATCCTAATTTATGTCATATACTAACATGCCAAATCTCGTTTTTTTTATCTGAAAAAATAAAAAAGTTATAGGGGTGAGCCACTTTTGAGACACACCTGGTAT
41747	8	107.245	AATTCAATTGTTTTTGGTCACTTCCTGTTTCACTGGAAATGACTACAACTTTTGATTTTTTAAATAACACTCTGAATAGAATGACATACCGCAAGTCAACTTTTAACATTTTCGC
41794	10	60.2521	AATTCATAATCCAAGAACTGAACATCACAGAACGTCTCTCAACTTCTATACAGTCACGTTTACTTAAATATTTCGGTCGCGTTATGAGGAGGGATACTGACTCTATGGAAAGAGA
41936	8	148.164	AATTCAAAAATCGATATCTCGAAATCCATTAGAAATAATTGATTGTAGTTTTTTTCGCAAACATTTCTGCTATATTTTCTTCGCAGACAGTATGTGAAAATGTTTATAAATAAAA
41988	5	11.2247	AATTCACGTATTAGTCCAACTCTAATCTGATGATATCGATGACTTGTAATTCATGTGTAAAATCATCTGGTGTGTGTTATATGGTCAATTATACTGATATACCTATTTATTTTAT
42009	9	34.9491	AATTCTTTTCAAGAAAAGAAAGACAATGTCATTGAAGAAAATTTATTTTTATAATTCACCATTTTCTACCCCTTCCAAACCAGCAAAAAGAGCATAATAATAAAAGTAGTATCTA
42016	3	95.3566	AATTCGTATAATTATTCAAAATCTACAATTTGCTTCATTTTAAGGAGTTCTTTAAAAAGTTTCAAGTAAAATTAACTGCAAAATAAAATGGGAAAAACTTATTCATCAAGATAAA
42026	3	19.5469	AATTCAAAACGTCAAAATTTGTAGTAGTAATTTTCAATTAGTAAAAAAAGTTAACAAACTTTTAACTTTTTCCACTAATTATAGTTCAAAATTTGCGAGTAATGTCATTTTGACT
42114	2	78.6281	AATTCGATAACTCATAGATAATGAAAGGGTTGGTAATAAGGCGATGGTTATTTTCCCTTGGACAGCTAAATCGTTGGGGATGGAGTTTGACTTGGTAACGGTAATCGATTGGTCG
42135	2	83.9579	AATTCAAAGAACTTTGGAAACATATATTTGATCGTGTAATTTTTTTCTTATCCTTTCATGGCCGCTTAAAAGATACCCAAATCGTATTTTTAATGATAACTCAAATTTTTCAAAT
42186	3	159.057	AATTCTAGTAAATTATTTTACTTAATACTTAGCAACTAAAAATTATAAATAATAAAATATTGCTTATATAAATACAATCTGGCATAATACTCAAAATCAATACTATAAAATGATA
42207	1	22.4719	AATTCATGCTTTTGTAGCTGAACGGGGAACCTGAAAAGAGGATGCTCCATGTAGTGCCTTTCGTTTTTTCTATTTATATTATTTTTAATTTACACCAGAATGGAAAGTATAATTA
42213	3	156.819	AATTCGGGCCCAGTACAAAATTTTATCGTTTTTTAGAATGCAGTATTAGGAAATCGCGGTAGACTGGAAATGGAACCAAGAGATTAAAAACTGCTGTCACGGCGAGGTTGAGACT
42292	5	54.3343	AATTCCTAGGTAAAAGTCTCTGGGCACTCCACTAATTATATTTTATTAAATTTTACAGCAAACAAGAATATTAGGATGAGTCTTACCTGGCTTATGGGCGTGCCGTCCACGGCTA
42318	11	47.334	AATTCGTTACTATCAGAACTGTTAGACTCAAAAAAGGTTTGAGTATAGATCTTTTCAATCGCACGATACTGTTAAATAATGTTTTCTGAATATCTTTATTCTGAGAATATCCAGA
42328	3	151.482	AATTCGCGGAGTATGACTTAATTGCTGTTCATTTTCCGATCACTCGCAAGCCTCGCTGATACCACATACATCCACAATAATTTAACAAATAAAAGAAATATTTGAACTTTAAAAA
42384	3	41.4852	AATTCAAATAGAGGAAGAAGTCAGAGAGGAAGACAGGACAAGCTTTTTGTCTCTCGTCTGACAAGCTTTTCACGACTCTTCTTGAATCTGAGTGTAAGGAGATCCACTGGGATTT
42469	3	152.954	AATTCTGCTCTATATTTATTTTTAATAACCTAGGATTACGATACGAAAAGTGATCAGGCAGGAACCAAAAATGCAGTATATACAGGGTGTTCCCCGCCTAAAAATCATCCCCACC
42494	6	17.0893	AATTCATACAGTCTCAAAGCTTTGAAAAATGCCAGTATCTGAGACAGTTTTACAGAGATATCGTCGTAACAAAGCTTATAAAAATAATGCCCATTTTCCCCACAGAATCTGCATT
42565	5	147.527	AATTCGGCACACGTTGGAGTACATTTCCATTAAAATGGAGGAAATATTAAAAAAAAGCTGAAGAAGCAGACGACAAGCGTTGCTTCCACCTAAAAGTGAATCCATTTACCAAAAG
42568	8	190.793	AATTCCTTACGATGTTATTTTTGTTATAGGAGGATGGACAGCGGGAAGTCCAACCTCTTTCGTTGAAACCTACGATAACAGATCAGAAAAATGGTTAATATCCAGCGACACCGAT
42600	5	206.829	AATTCTCATAGTTTCCGTTTTATGAACTAATTCATCTCGAGAATTTCTCCATTTTAACTACTGGAAAAATTGTTTCGCAGCCGTCAGCTCCATCGTTTACCGCTCGAAATACACT
42622	8	132.791	AATTCGTTTTAAAATCAACTTTAGTTGGTAAAAGAATCACCCAAACTTAATTTCATTTTACATTTCAAATGCTAATAAATAGAAATTGATTTACATTTGTTAAAAAAGGAAATTT
42868	6	20.9968	AATTCAAATGCAATTTGACCCCCTTTTTAGGTTATCTTGTATTTTAAAAAAATTGCCGAAAATGAAAATATCGTGAAACTGTGTTTTGACAAACAATTTTTTTCAAAGGAGTATA
42893	4	17.9745	AATTCAAATCCATAAATGTACGAAAATACAGCTATTATAATCTTGCGGTAAAATCAATTATTGCAAGCAAGTTTATTACACATACAGTATAATTTTTAATTATTATTCAACAATT
42902	3	34.9562	AATTCACAGGTAAATTATATTTTCTGTCAATTTTGGATGTCGTCTGTCGAAATTTTCACTGCCTGGTTGGACAGACTTAATAGTGTTTGTCAAAACTGTAGTTTATTTCGAAAAT
43014	3	52.6188	AATTCCTTTTAGTCTTTCCTTTTGATACCTCGTAGGTACCTCGTGGTTCAGACAAAAAGCATTGATTTTGATTACACAAATTAACACAAGTGAACACACAAATTATATATTTTTC
43099	5	126.487	AATTCCTTCGGGAATGCGCATACGGGAATAAATTGGATGTAGTTAATAACTGTCTTTTTTAATTAAATTCTTAATACACCGAATATCTGGACGAAAGTAAGCCAAATTTTGACAG
43100	1	56.5103	AATTCCATAAATTTAAATAGATCCATCAACATCAAGCTCGACACTTCTTCCTTTATTATATAGGGTCTATAAATATCCCTGTTTAAAATTGTCCGTTGTTTTAATAACAACAAAA
43105	8	80.6439	AATTCAAACGTAAAACATCTAATGAATACACACTTTTAATAATAGTATGTTTCCTTGTTTAACGTATTATGCAATATTCTCAGGCGTCTATTTGTAATTCGTGACACGAAGGAAA
43291	4	23.2698	AATTCTTTGTGTTCAGATTTAACTTCATCAGGGTATAAATGCCATGGAATCTGACTGATATATTTTTCTACATTGTCAAAAATCTCCACGCTACTTGAATAGCTTTTAAATACTT
43317	5	190.678	AATTCTTAGCACGTAGTACTTAACATTTTTATGAATTAATTATTTTTTCTATACAGTTCTTTAGAATAATAATAGTAAAAATGTGGAAGAAATGTACTGAAATGTAATAGTACCT
43325	3	0	AATTCCACCAAGCCTATTTATATATTAGCAAAATCAATAAAAATTACTGGTTGTTACTGGATTTTATATAATTTTATAGGTAGAACACATCACTGATGATCAACTATTAGACTCC
43344	9	31.018	AATTCCAAAGTGTTGCAAAAAATTGGACAATAAATTTTAATGAATTGTGTAAAATGTTGAATAAACTTTTAATTTTTTTACTTGTGCAATTATTTGTCACTCGTCCCATCGTGTG
43356	6	96.9771	AATTCCATGGACTCCATGGTGTGGTTTTCGATATCTTCCAACACTTCCGTGCCTTGCGTTACCTTGTTGTCGATGGTATCGCCTATATCGTCCATTTTGTTCCTTAAGCTGTCTA
43376	3	151.482	AATTCATCTACCATATCACACACGATCCTGTTTTGGAGGATAATGCCGTGAGTTAGATGCACCAGAGGAAGTTTTTGCTCCCCTCAATACCATAAAAAAGACATTTACAATCATT
43508	3	148.258	AATTCGCATCAGCAAATTCAGAGGCTACGAAAAGAGCAAAATTGAGCTGACTGAAGCGGAATCCAACATTTCCTTCCTATGTATAGCACGGGATACAAAAATCATTCGCAGTTTT
43522	5	119.102	AATTCGTTCGGCGTAGTGAGCTAAAAACCTAACTCGAAATGTATATTTTTCTAAGGGATTGATTGAATTGAATCCCACATTGAAGGGAATCAGACCAAAGGTGAATCAGATATAA
43688	2	78.6283	AATTCATACGCTCTCAGAGATTAATAAAATCGATTAAAACGAATATTCCTTTACTCCTCTGTTGCATGGAAAAGCGAAAAGAGAAATGAATAATGAATAGACTGACTGTTTCACG
43792	5	207.83	AATTCCACAGAGTTTATTAAAAAATGTACGGGTCATGTAGAAATGGATCAGGTTGCTGGCCTATAATACTTAATAGGTTCTAAAGCTATAAGGAAACGTCTCCCTTCGAGCTTAT
43800	3	34.9561	AATTCGTGACAAGGCTGATTTTATTTCCCCTTACGTCTCAAGTGCTGTAAGGTGAAGACACCAATCGTTCTGCGGTCAACGCATAAAACACTTACTTCCTCTAATTCGGCCAGCG
43877	5	98.6592	AATTCCTCAACAAGGGCTGACGTAAATGGTGGACCATTGTCACTCACCACCAACTTGGGCAGTCCGAACCTGGCAAATGTCTCCCTAAGCCTTTCTGTTGCTTTTGCACCATTTG
43945	6	103.423	AATTCACCACAATACACCAAAACACTTTTCTTTTACACTGGGCGTGCGTTTCGCTAACTATGTTACGTGTTATAAGTTTTAATCATCTGCTGATGATGCTAACGTGGTTAGCGAA
44007	8	58.3877	AATTCAAATTGGCCACGCACAAATGTGATTACATTTTGTTTTAAAAGTTTATCGAGTAATTATTGCGAAAGCTTTATTAGCTTTTACCAATTTTGTATGTTGCCTTTTTTCTCCT
44009	5	185.02	AATTCTACCAACCTTCAAAATATGTGCACTTATTTAAGGCACACCCTGTATATTGTGTTAATTTTAAATAGTCTAGTAGATACTTTATTCTGATATAAATGAAAACACTGAAGCT
44023	5	207.83	AATTCATGGTAGGCTTTGGGAAAAAGTTGCTTTTAATCGTATAAAACACTAATAACTAATAATAATACTATACTAATAAACTTAATACGTAAAAAACGTCGTAAATGTATATTTT
44062	1	48.0539	AATTCTTTTGCTGATATTTTTAACTGAGTTATCACCAAATACATATCGGTTCTAAAACCTGACATTTTCTCGAAATTTTAAATGTTACTATCAAAAATTAAATAGATGCACTCTC
44129	3	75.1348	AATTCATAATAGCACTAGTGCTATTATAAAAGCCATAATGACATCCAAATGACAATGTTAAATGTGTCATAATGACATTGTCGTAGATTAATTTATATATTATCTCTGAAATTAT
44147	2	3.89028	AATTCCAGTAAGGTTCTTCTAGACAAGAAGAGATGGCAATGAGTATCTTACTTACATACGTACTGTTTTGTGACTTTTTATCAACCTTTATAATAAATATTATAATAATTATAAA
44282	8	87.5846	AATTCTTTAATAAATTGTATATGATATATGAATTGGATTTATAATTTAATATTATTGTGTGCCATAAAGTGTTGAAAAACAAATGAAAGAACTGTATATGTATTTCTTTTTCTGG
44372	8	78.4692	AATTCAGCTCCAGAAAACCAATCAGAAGCAGCGCTAATTTCTGTAATTTACAGTCCACTCTTATAACGTACAGCAAATTAAATAAAGAGAACTCGAGAGAGAGTGTATGTATGAC
44433	3	43.0326	AATTCAGCATAAGTCATGCTTGGTTATTGCATAAGGTGTTTGCTTGATGATGTAAACTTTTAAAAGATATATTTATGTCAAACAACAATAAAATCTTTAGCTATCCAAATATGGA
44470	8	139.064	AATTCGGAGTAAAAATGACTTTTTGTGCCTCGTCTGCAATGTCATACTTTGCTAACGCTTGTCCGCCAAACGCACAATCTCGGCACAAAAAGTATCATTTTTACTCCTAATAAAA
44515	5	75.3373	AATTCATTCAAAGTTATGCTATTAAACATATCCTAATTAAAGGAAGTTAGTAAGTTTTCCAAATGAAAGCTGAAAAATGTAACGTTCTAATTGGTTAAAAATAATCTTCACTTTT
44563	3	0.0003	AATTCTCCATTGAATATCGGAGTAATATACTGGGTGTTCCATTTAAAATAAAACAGTAACATATGCTTCTAAAGGTGACCAATGTTCAATATTAATTTTGAACCCCTGAAACCCT
44681	5	128.909	AATTCAGTCAAATGGATACCTTCATCTTTTGACAATATCCAGTTTTTGGATATAGGTCCTGAGTTGAGCCTTATTGAAAACGTGGATAAAGATAGAATACAGTTCTGGGACCAGT
44731	5	128.909	AATTCATAATTATTTTAGAGAAAATTACTCTGTTTGGTACCTTCAAAGTTTGGTCATTCTCTAAGCATTGGGTAAAATGTCCTGGAAATTTAAAACATTCTGTAACTTTATTCAT
44761	5	172.032	AATTCATGTCTCTTCAAAATACTATTAAGGTTGCCTCCTACCCCTCAGACAAAGATTTTCCAAGATATTTTAATTTTTATGACTTAGTGACAGTAGATCTTTATTATTTAATAAA
44879	3	41.485	AATTCTTGAGCAACTTTTGGCCGCGGCCGCGTGGAGATCGTGATCGCGGCCGTGATCGCACCAGTGTGCGTACAGCTTTAATAAGTCAGAACCCGATATGTCAACGTTGTTTCCT
44962	5	48.6222	AATTCCAGTAGTTCTCGATTTTTATAGCACTGTTGGGGAGTGCACATGATTTTGGTTTTATCGATATTCAGCTTAAGACCCAAAGCCTCGTATGATTAGGTATATGTGTTCAACA
45018	5	200.833	AATTCCCAGTGCCGTCATTATTTATTTTTATGTGGTCCTTCTGAACGCGACGTTTTCAGAAATACTCCTCTACAAAGAAATGATAAAGTTTTATAGTAAATTAGGGAATACGGCT
45090	7	30.3911	AATTCAATGAAAATAATACTATTCACTTTATATCTATCAAACATTATTATAACAAAAAATAGGTCATAGATATTAGTTATGCAGGTAAGGTTACAGCAATGATTTCACATGTTTT
45096	6	112.808	AATTCCTTGAGGATCGATAAATAAGAAATTTTATCGGCTAGATGGATGGTGATAGGCGATAGTCATGTCTCTCTCTGTCTCTAAGGAAAAAAATATATAACAAGGAAGCCTTCGC
45328	8	107.244	AATTCAGAGTTTAAAAAATTCAAAAGTTTTAAATTACAAAAATGATATTGGGCACACTAACTGATACTTACGATTATAACATAGGAGCGTAGACAGCACATACATAGGTTGATAA
45458	1	63.8956	AATTCAAGAACCTGGACTCCATCCGTAACCTGGAATGGTAATCATCCAACGGTCTAAGACACTCGAAGAAATGTCTCTGAACTTACAACCGAAAAAAATCAAAGACTTTCCTAGA
45710	5	128.909	AATTCAACAATAATTAGGAATATAGTCTTCCATCCCAGACCTTAAAAAAAAGAAAGAATCTTTGATGGCTAGATTTCGCCAGTATCAAGCAAAGGTGAAAAATACTTTTAAAACT
45769	9	10.7758	AATTCTGAACAAGACAAACTTGAGATAAATTGTCCACACCGCAAGAACAAAAATACAACAATGTCAAAAGTTTAGTTGTTGCGAATGAGTTTTATTAACCATGTGTGATTTCACT
45796	2	33.2468	AATTCAACTACCTCGGCAGTTTGATTTCGGAAAAGGCCAATATCGACTCTGATATTCAGCATAGAATTAGCAGCACCTTAAGAGTTTTGTACAATCATGAACGAAACTTGCAGTG
45837	8	107.245	AATTCGTCCATTAGGCCATTAGGTTGCGTATCGTCCCAATTCTGTCAATCGACGATTTAACTATATTTTCTTTATTTCCAACAACCTATTATTTTGTTATTTTTTCTTCATATTC
45992	3	69.076	AATTCAGCCGAAAAATAACCAATATTCTATATGACTACACCAGAAACCCTTTGCCATCATTCATCCTATCCATATCGGAACAAATACTAAACTAAAATTGGCATTATTTCGTTTC
46058	4	88.1707	AATTCTCGGAGATACTCTAATTTATTAATTTACTCTTTATTATTTTGAACGTAAACTAAAGACTTTTCATACATAACCCAATACGAATAATTTCTATTTAAATATGTACTTATAA
46157	2	78.6279	AATTCTGAGTAAGTCAAAAATTAATCTGTATGCGACTCAATAATAATGAATGATTGCTATTTGAAAAAAATATAAAAAATAACTCGCATTTGTGATCAAACCAAGCCCACTATTG
46418	2	83.4767	AATTCGCTCCCAGTGTCTCACTGTTTCTTTCTTTAATGAAATTCCACTCAAAAACCGAAGAATACTCTAAATTTTTACTAGAGCAATGTGAGGTTTTGTTAAAGTTGCTCATGCC
46457	8	21.4096	AATTCGGCATGTTCGATTATACAGGTGATTGTTGTCATCTCTACATGTTTTTACTTTTTATAATTTATGGTAAAAAAAGTATTGGTTTAGGGCGAAATTTGACTATATTCACCCA
46548	8	58.3876	AATTCTAGAATGTCACTGGAAGTCGTTCAAGATTTAAGCAGAAGAAGCGTAGTTAGCCTTGAAAATAGACTTGAAAAAATTACTTTTGAAACGCAGGAAAGCTTAACAGAATTGC
46646	9	42.2339	AATTCCGACAATGGAACATCGTAAATACAAAATGAGGCGAATCGATACTGATATTAATATGTGGGTATCGAAAATGTGACATGTTCACCAAACCACATGAATAAAGATGTCATGT
46658	6	32.991	AATTCCTTAAATGTAGACAGTAGTTATTTTTTAAACTTTAAGTTTTAGTATAGTCTAAAAATTTAATTTCAACAAGAGTTTTCGGCTAGACTAAAATGTTTAATTTCAAGCGAAT
46796	5	207.829	AATTCAATTCAAAATCACTCGTCACAAAAATTAAAAACTATACAGTACGCGAGGTAAAATATCACTAGAACAAGGCTGGTGTCATGTTCACGGCCAAATCTCATGTGTGTATGAG
46906	6	98.2639	AATTCTAGTTCCTTGGGAGGAACCAGTTCCTCCAGAATAGTTCCTTGAACTAGGTCTTTAGTTCACAATAGTTCCCGACTAACATTGACATCTCCGTTGCTTGCTAATGGGTTTC
46969	9	36.8958	AATTCTATTATAGAATGGTAATGTTAAGTTAGGTTAGGTTAATCTGAAATACATAAAATACAGATTTTTGGACACAGTCCTTACAGTCAAAATTTAAAATTTTTAATTTATCAAA
47046	6	86.2631	AATTCTAGGATGGCGAATGATTGGACTTCTTTAATTATCCGAATGAAATGAACTATCCATAATTTCTAAGAAATGAATTGCCAATTTTGTTAGGGGATGAAATTGCGTTTGTTGC
47059	8	116.381	AATTCCGAAAAGTAGGTTCTGGTAGAATAAATCATTTTTCTAGGTGGTTTTCTGCTTCTTGCTTCAGCTATGGTTATCTGTTTACCCTGAGGATTTGTAGCTGCGAAGTACTAGA
47210	1	30.6899	AATTCCTTTTTTCAGCTGTTGGCCGTCTTTCAGAAAACAAGTTTAAGCAAGTCTTTCGACCGCCATAGAATAAGCTCAAAGCAAATAATAAAAAGTTCAGTCGCCTTTAAATAGA
47331	6	86.2632	AATTCTCATTTTTATTGATGGGACGCGTTTTATTGATGGGACGCGTCGTCTAATTTGTTACGAGAAACATCGATTAAACGGTAGTAGAGAAGCTAGAGAGAACAGTGCCGTAGTT
47359	8	76.6187	AATTCGTACTTCACAGGATCCAAGTTCTTCTCTTCGCAAACCTTCTTCATAATGTCTTCCAACAGAACGTTTCTGCTCACCCTTGTTACGTACAACTGGTTTCGCGGTAGATGTA
47479	8	74.3549	AATTCTACGCAGTGACATTTTACAGAAAAGTGAATATTTATTTTTTATGTTTCAGTTTCAGTGGCGTAGTTCCCAGGGTTTTTATCTAAAGTGGGTGGTAGCGCAAATATTTTTT
47535	2	86.3642	AATTCCATTGTCTGGCCGAAATGGCGACTTCAAATACGCAATAAGCGGCATCAAACCCCACATTCTAGTATTAAACAAGGTAGATCTAATAGAACCCCGCTTTAAGAAGCAAATA
47649	9	46.1097	AATTCAGAAGAGCAAACAAATTATTGGATGTCATAATAGTCCCTGGTTGGACCGAAACTTAACTCCAACAACTAAAAAAAGATTTGGATGAACATTGGTGGAGTTAGTTCTTTGC
47800	5	106.382	AATTCAAATAAGTTTTGTCTGACAACTTATTAAATTACCAATTCTTACATTCCCAGTTAGAATTAAATTAAATCATTTGTAAGACTGTAAGTCAAATAAATGGTCTGTTACTAAC
47844	7	85.6106	AATTCAATTATAATTTATATCTTTTATACTTGAGAGTTCACGGTCATTCACAATGTTAAAAAAAATCTAATTAAAATTAATAAAATATCCTAGCAGCAGCAGCTTGCAGTAGTCT
47891	7	24.6027	AATTCGTTTCACCATTCTCTAAATTTGCTTATATCAAGTTAATTATGTAAATAAAGCTTTAATAAGCAAATCTGAAAACGCGTTTCCAGAAACTCTGATAGCTCAAACTCCAAAA
47906	2	33.2467	AATTCATCAATGGCAACATAATGTCGAAACCATTTTTGCCTTTTTCACAAGGTTCCATACATTAATCTTTGTTACAAAACTGCTCTTTTTAGTATGTAACAGGGTACACAGCCTA
47931	8	143.939	AATTCATTTTCATTTGCGTTTTTTACATTTTACGTATTTTGAGGGCTTTTTTACATAAGCACATACACTTTACTTTTTAGTTCTGTTTTATCGGCAGCTCAGAAGATCAAAACTA
47990	5	221.583	AATTCGCTTTTTGCTGAAAATAGTGTATTCATGCCTTTCAAAATTACTCATTGTTTTACACAATTATAAGTTATAAATATATTCATTAATTTTTTAATGTGCAATGAGTTCTAGA
48116	5	123.718	AATTCAAGTAAAAAGCAATAAAATACTAAAAAGCGAAATAAATAAAATAAATAAATGAACCTAGAATACTTGCTGCAATTTATTGCACTGTCCCTCAAGCATAAGGTAATTAATT
48124	9	1.93992	AATTCTTGGAGAATATTTGGCAATCGTGAGTGGGATCCTTAGACAGCGGCAAAAACGAGTGACCTTCGTAAGCGGTTGTTGCCAACTTTCCGTCCTTGAACGCACGCAGTTCGGC
48132	8	0	AATTCAAGGGATGTGATAAATTGATATTTTTGTACGATATTTAGTACATTTTTTAATAATGTTGGATATATCAAAATAAAAATTAACGTACTTCATGGAAGTAGACGAAAATCTT
48296	4	12.67	AATTCTACTAACTCTAGTTTTTCTATTATAATTAAAGATTTATGTTCCCTTTTTTCTCGTAATTACTGTGATACGTCATCGAAGACGTTCATTATCCCCCTTTTATTATTATCTG
48310	3	151.483	AATTCATAAATAATCTGAACTTCTTATTCCTCTCATATTCTAGTGAAATTGTGGTGGGAAAGTTTTAGGGCAGTTCTGATTTATTTTGATCTTTATGTTTTTTGGATTGCTGAAT
48313	9	8.84941	AATTCGTTGTCATTTCCTCTGAAACATTTTGTAAACATACCACCTTTTTTATGCAAGATCTATATCACAAAAGCTATAAGTTCAAACCAATTAAGCAATAAAAATGCAACGACCT
48376	6	15.5231	AATTCCAGGCAGAGTACGGCACTCCTTTCATTTCATTTAATAAAATGGGGCTATTTACAAATTTAGCGTTTTATTTACATAACCTATTCTTCTCAAATTTCCCAAAATATTGCTT
48467	4	38.7382	AATTCGTATCAGAAGAAACAAATTGTAATGTACCGCGTTCCTTTTTCTTCAACACTTAGGAGTGAGATAAAGGACAGTCTTTACCGACGCGATTTTCTCTTATTGTGCCCGTACC
48665	7	62.2482	AATTCGTCACCACCTCTTTCAATCCTAAAGCGCCCCCTAAGGATCTGCAAGTGACACCCGAAGAACAGGATCCGTTGAGGATGTTCATCAGTTGGAAACCTAGTTGTAGTATGGC
48695	9	48.0459	AATTCTGTTAGCTTGTATAATGAAGATTTTATTTTTATTCTTGTCACTGTACCACACACTTTTTATTTCTCATAAACACGGCAAGCTCTTTCATGATTCGGTAAATTAATTTAAA
48789	6	52.0256	AATTCATACGCATCGGCGCGGCGTCCGTTTGTCGTTCATCGTTCCGTCAAAGTAATAAAATTGAAATATGATCTGTCATTTTTAAAATGAACCAATAAAACTGAGTTTAAAGCAA
48939	8	46.5002	AATTCGTTATTGCAAATTAACTTAATAAAATGAAATTCTACTTTATTCAACTCTATTTTATTGGATTTCAGATTTTAAAAGGAAAAGTAAAACTAAAACTAGTTGCATTTAGGGG
48946	5	60.8965	AATTCAAGCTGTACCATTCCCATTAAGTAAATGATCGTCGATTTATGACGAAATCAACAAAGGTGTGGCATTTGTATGTCCGCACTACAAAAAATACGAGGAAAGGTACATGTAT
48959	5	116.675	AATTCATTCTTTGGTAGATTATTATTGATAGAATTTCAATTAACGTCATGTTTTTTGCTGTTTTAAAATGTTAAAGAAGGACAACATTTATTTAGTTCAGTGCTACGGATAGAGT
49077	5	132.764	AATTCCGAAGTTTTAAGGTGGCATTTTGATTATCATCATATTGCGCAACTGAGGCTCGAATTTGGGACAACCTGTACAATAAAGCAACTTTAAATTAATGATATCAAAAATATTT
49201	5	150.141	AATTCTCGACCGTTTCCGCATAATCGAAATAATTTTGGCAATGTGTGAAGCATATCGGCTTTTTAATACTACAGGGACACAAATCCTCTAAGTCAAAAGGCTTTTTATAGATTTT
49225	8	21.4093	AATTCTGGGGGTAATGTGGAGCAACCTGGGGTACTGGGTCAAAAATAATTGTTGATATAGCGCCGTTAGTTAACAAAATTACTGATTAGTTCTAAAACTAACCGTATATAGGGTC
49418	5	183.319	AATTCAGAAAAAAATGTGTTGAATTTAAAATGTGTTTTCGGTCTTTACAGCAATCAATAAAAGTTGGCGTGTACGTCATCAAAGACGTCGAAAGCATCACAAAATTAAATTTGAA
49456	6	67.4297	AATTCAAGTACGTTTTATAAGTATTAAATATGATACAGTACTTTATAAACTTTTTTTATAGGTTCAGGAAGAAGTCTTTTTTCGGAACGCACATTGAGCCCTCACAGGAACTCTA
49493	3	1.1547	AATTCCGTACAGTGACGGCTCGTCAGGGTCGTAAAAGATAACAGTTAAATCGGCACATTTTATTTCAAAGGTACCCAAAATACGGAACACTATTTTCCTAAGGCCCAATACTATA
49572	8	173.272	AATTCCAGTCACATGATCTAGTCCACTTAGTATTAAAAAAATATATATTTATTATACCTACATTACCTTTTACTAAGAATTATTAATGAGCTTTATTTACTTATTGTTTATTTTT
49575	10	45.1599	AATTCTGACAAGACAAACTTGTCCACACCGCAAGGACAAAAGTACAACAAAGTCAAAAGTTTAAGTTTAGTTGTTGCGAATGAGTTTTATTAACCATGTGTGATTTCACTGGTCT
49640	7	90.2389	AATTCTTGAAATACCTTTCATAGACACAAATCCAGTAGACATACTCTACGTCAGTGTTATTATTCACTATAATGTCAAACAAAGAACTAAAGATTTCTTTGAAACAACGGAAATG
49716	7	47.799	AATTCCCTGTATATTTTGTAGGTGTGCAAATTCTCCAAAAAAAAAATTCTCAAAAACTATCTAATGTGGCGTTTTTTTACAAGAGACAAAAAATGTAATAAACACTAGAGGGACC
49882	7	51.6508	AATTCTGAGATTAATTATATGAAATTTCTTCTCAGCGCAGAGCCACGCCACGTCGCCTAACAGTGGGGGGAAAATCAAAAAAGGGTCGATTTAACAGATTCTAGATTATAACGTT
49936	3	11.2472	AATTCTTCAGCTTTAATAATAATTCTTGAGCGGTTTCTTTGATCTCGAATCATAAAACAAAGCCGCCAGCACTACTGAATACGGTCGCGGCTAACAGAACTAGCCTGAGGCATAC
50012	3	110.838	AATTCAGACATATTTCTTGATAATGTCACGACTTAGCATTGAATGTTTTTGTCGTGTTTGTTGTGGTTCGCTCTAGGTTCCAGGTGCTCTTTAAGACTAAAACGAGATAATAGAA
50144	7	62.2483	AATTCGTATAAACCATTCAAAATGAACAGTTTGCTTCATTTTAAGGAGTCGTTTAAAAAGTTTCAAATACATTTTTCTGTAAAATAAAACGGGAAAAACTTATTCATCGTTTTTA
50558	4	26.1647	AATTCCGCAGACCAATAACGTTTATTATGTTGTCATTGCGAATCGGCCATATGCCGAGTTAAGTATAGGGTGGTCTGCCCACACGATAACATACTGCGTGGAGCAATAAAAAATT
50599	9	12.2278	AATTCAGGTGGTAGCTCTGCCTTAAAAAATGTCAAGTTGCCACATTTATTTTTTTATTTCCTGACATTGTCATTCGTTTTGGCACTTTTGTTTTTTATTACCTGTTTTTGGTTTA
50610	5	60.8968	AATTCATATATCTTTAAAATAGTATTAAGGTTGAATACGCCTCAGACAAAGATTTTCCTATAGATATTTTCATTTTTATGATTTTGCCTCAGCAGTAGATCTTTATTATTTGATT
50616	5	56.8826	AATTCAGGGATTCTACAAGCACAGAGACACAATTTGCAAAGAACTGACTCTTTCCTGTTGAACTTTTGTCGCGTTTAACATTTTTAGTCGAAAATAAAGTTCATGGCTGGTTGCA
50618	9	1.94002	AATTCTCATTTTGTGTTGATAGTTTCTCTTTTAGTACGATACACTTTTCCTTTATGCTCCTTGTAAGCCTTGGAGTGACATACCTTTGACCAAATAGTTCAGTTATTTTTGTTAT
50694	2	21.3886	AATTCTGATTATTCAGTTGTGTATACATATTTCAGCATGCGTGTAATTATTTACAATTAAATATATTAAATCGGAAGGGCTTTCAATCACGTATTGTTACCACAATTATGTATTT
50906	7	66.582	AATTCAAATATACATATATTTAACAACTAAATACTAATTAGAAAATAATAGCCTAACAAAATCTTTTAAATACTTCATCATAGTCAATCAAACCAAACCATACCATAGCCAATAC
50926	1	55.5243	AATTCATATTAAGTAAAGTACAAGAAGGAAAGTCCTTATATCACAAATTTTACTTATTTATTCAATAACATTTTTAATTTTTAGAAACTAATTTGTGGATTTTGCTACCTCATCA
51057	8	184.201	AATTCCTTCTCAAAACTATTAAGTCAACAAATTATTTGTCGACAATATTGAAGAAATTCCATTTCGGGGCGTCTAGAGGTGGAAGTTGAATCTTGATCGATCTTTTTTCTATTAA
51123	6	115.213	AATTCCGTAGCAATGTTGCCAGCAAGCTGACGTTTTATACATTTCAAGGAGATGCGATGCTACTTTGTCAAGTTTATCGTCATCAAAAGGCAGTTTGGATGATTTAAACGTTTCT
51214	5	53.9818	AATTCAATAATAAGATTGAAATATAGTAATTAATTCTGAGACCAAATTAATACAGCCATATTTAGTATTAGTAACTAAGTGGTATGCTCTATATAATTGCCGTAGTATAAATAAT
51248	3	81.7655	AATTCTTTGCCAAGCGGCGTAGACTGCATTTCTATTTTTGTGAAGCGGATGCATAGCATTCCAAATTGCAGGTTCATTTTCATAGATCTAAAAACTCTCCTCATTTGACCACTCC
51304	5	116.675	AATTCGTAAATAGGTTTTTAAAGGTGTACGTATGCTGAATGCACATGCCAAATTTGAAAAATTTTCTTCTTCTTCTTCCTACTCTATATTAGGCAGATTGCCTGTTCATTCTTCA
51365	1	83.8605	AATTCTTAAAAAAAATGTTTACAAATAATCTTAAAAATTCTTGAAAAGTGAATTGCAATGACAAAAAATAGGGTTTTTTTATTGGGCGTCCTACAGAGATAGAAAAAAATAAGGG
51439	8	142.65	AATTCTTTTATTTCGAAATTCGAACAATAATTAATAAAATATCAACAAATTCCTGACATTTTATCCCATAATTATATGTTCCACAAACTTTCTATGACTTAGACGGGGAACAACT
51519	7	95.7759	AATTCTTTTGACATTTTTGCATACGGTTTATTTGAAAATATACCTTGCGGTTTGTAACGAAAATTTGACTCGAAATACCAAGTGTGTGGTATCAAATTATTCGTAAAAAAATGCT
51527	1	98.6002	AATTCACAGACAATGACAAAATCTAGATTCAAGCCAAAAACAAACTTTTTTTTCGAAAAAAAGGTGGAACTCAATTAGATACATTAAAAGTAAAGTCGTGAAGGAAAAAAACTAT
51561	10	31.5585	AATTCCCGCTGTATGTATTTCTATTAACAATAAATGCTATTTGATCGATTTTACTGTCGAGAAATTTTTCATTTAAGTTTATCTTTTGAATTGTAGAGTTAAATCTTTCAATCAC
51574	3	13.7571	AATTCAGATGTAAAAACTGGAGCATGACCTTCTTCACCTTCAATAAATGGCATTTCAGGTCTGTTAAGGGAATCTTCAAGATCCTGAATCTTTTCTAAACCTTCTTGTCCTTTAG
51584	5	120.025	AATTCCCAACCCCGCTGTTTTTACTAGCCGACGAATAAAATTACCCGCAACCAGCCCGAGCTAGCTGAGTAGCCCATTAGGGAAATCTGATGTTTGCATTTTCCAAATCCTTCTC
51694	6	84.9736	AATTCATCTGTTACCAGAGATCACTACACTGATTTGAATTTCCAAAACAAAAATATAAAAAGTAAAATCAAAATTTCAAATAAAAATTGTAGTAGGAATTAAAAATAACATTTAC
51713	1	85.4439	AATTCATAAACTTTTCAGAGATTTCTGGTTGTACTGCGTTATTATGGGTTTCACAGCTTCAGGTTCTGGTAATTATTTTACCAAAATGTGTGCCTAGAGCATGTATACTTCCGTG
51828	5	135.178	AATTCGCCCATTAGGTTGTGTATCTTTCAATCTGCTTTCAATCAACGCTATAACTATAAAAATAAATACTAACCTCTGTCTTATTTTTTGGTATATGTAAATAGCAGTTAAAGGA
51977	4	23.2699	AATTCCTTTATAACGACAGGTTTGAGAACAAGAGAACTCCATTAAGCCCTTTGGGCATCCTTCCCTATTCCCTAGGCAACGTAAAACTACAGAACCGTCATCCAGTATAACTTGA
52055	8	107.245	AATTCATGTTACTTGAGTTCACTTGAATCATGAAAACGCGCCTTTGGGCTGATATTGAAATTTTCAAGTTCTTTTGCATTTGCATTTTTAACCGTAAATTAATTATTTGTATTGA
52468	5	150.141	AATTCTCATATTAGCTATCTAAAGTAAATTAAAATATAAAAAAACACAATATACCCACAGAAAAATGCTGAAAACACATGCTACATACCCTCATATTTTTAAAAAACAATGATAT
52475	8	88.9009	AATTCTTCGAAATCATCGAGAGGAAAAGGAAAATAGCCTATTTGGGACACATACTATGTGGAGAACGCTATCACTTTCAGCGTCTGGTTCTTCAGGGTAAAATAGAGGGAGGCAA
52510	5	136.627	AATTCTAAGTGAACAAACGCTATCCATGTTTTGATCGGCGGTAACCTGTAAAGTAAGATAATGTCTATGAGTTGGTGGAATAAATACTTAATTATATCTGATATTAAGTAGTATT
52537	6	115.214	AATTCAAAATACTATTAAGGTTGTCTACCATAGTATTTTCAACTAATTCATTAAGGTACATACCTTGCTGGTCTACGCACAGTGGTCCAACCCACTGGCCCCCTATGCATTTGAT
52780	5	172.032	AATTCTAGTGATGAAGAATCATGGATATCCGCTAGACTTACTTTGCACAGGACAACCAAGCGTTCAGAATTATTTGGATGTGTTATTTATAAAAATATATCTGCCTTTTTTCCAC
52919	8	3.56634	AATTCAACGAAAGCCGTTATAATGCCCCTAAAGAATAAAAACATGCAAATAAAATAATCAGGTACGAAAATCTATTTTTTTTTTAAATTAAAAATATTTTAATTTTTTTTTAATT
52978	7	0	AATTCTTACATGGAAAATATGATAAAACAATTAATTGTAAGATTGTGAGTAACTAACACTACAACTAAAAGATTTTCGGCCAAAAGGATCAACTAACCGTTATCAAATGTAAGCT
53111	2	50.0719	AATTCGTGATAAGGCTTATTTGATTTTCCCTTACGTCTCAAGTGCTGTACGGTGGAGACAATAAAAAAGTTACACGATTGCTGAAAATTGCTATGCACTAAAAGTAAATGGACGG
53210	3	77.3367	AATTCACCCCTAATAACCTTAAGAGCGAATTTCCAAAAATTGCCCCTTAGTGCTCAATTACGTCAGCCAAGGGGCCCACGTGAATTTCATACTCCTAGACCAAATTTTAACAAAT
53255	3	3.39963	AATTCAATGGTTTAAGTATAATTTTTTTCAAATGAATAATTTAAGAGTTATCAACAGAAAAAATGATTTTTTATTTGGGATTTGGGACACCCTGTATATTTTTAATTAAGTGAAA
53299	10	19.3705	AATTCTTGTTCTCACGTTCATTATTCTTTCAGTCTAACTGAATCAGTTAGGACGGTGGATGACTGTGGAAGACTGCATCAGTGAGACCGTCAAGGTAAGAACCCGCCTTAAGTAT
53371	6	26.1349	AATTCGTTTCGGAAAACGTCGGAAAAAGAGGCAGAGAGGTGGGTTTCCTTAATTTCCCGACTATTTTCTCGATGAACTGTGGAAATACGCGAGCTTCATGTAAATGAGTTTTTTT
53444	1	56.0173	AATTCTTAAACCTAGTAGAATTTCATGTCTAAATATATATGTAACATGAAAGATATAATAAACAGCAAACAATCAACTGTTTTTAATATTCCTGTTGAACGTGTTTATAATAAGG
53445	10	26.7369	AATTCGTTTAATTACTCTATTTTACCGAAAAACTGGAAGGAATATGTTCAAATTTAATTAATAAAAACATCTGCATAGATAAATATAAAAAAATCGATCCATAAAAATATTTAAA
53454	9	31.0179	AATTCTGTTCGCGTCGCGTCCGCTATTTAAACTTAACCTAACTTTCAATTTAAAACTTTGAAATTGTTTTGTTTACTAGGTATTTTAAAACTATAAAGGGCTAAAGTGCTTATTT
53462	7	32.316	AATTCAAACAATCTAATTGGTGGGATTTCTTACATGTTTTGTTATCAGGTGTTAGCCATGCGTATAACGCTTTTCTATTGGCCAGTACTACCCTAATTTTATGCCCTTACTTGGA
53505	5	143.862	AATTCAATTGAAGTTTACAATAACAAATTAAAATGTCACTTAAAAATAGGTATATCTGTAACGAATAGGCATATTATATTGAACTAATGTTGTTTTAACAATTATAAAATATAAC
53589	3	129.5	AATTCATTTGAAAGGCATGAATTGGGGGAGGATGGCTAGGATACACATGATTTCTTTTAAACTCTGGTGATCCGTGCTGTACAGAAAAACACATCCAATGCAGCATGTGAAAGAC
53664	1	21.0157	AATTCATTGGTTAGTACGAATGCTTTGGTTTAACAAGTGTTTTTTTAATGTTTGTTGTTTCTTTTATGTTGTGTGGTTTTATTGTTGAGTTTGATAAGAACAAAAACCCCATAAT
53784	5	95.2899	AATTCGGGACCAGGTTTTAAGTAATTTTCAAGACAATTTTATTCAGTTAGCGTACAATCGGGGCCTATTATATTTTAATCCCTTTCAGGAAGTAAATACAGGTTTATTTTTTATT
53840	7	109.167	AATTCACACTATCCGTTCCGTTTCCCTTCCGTTCCATATCCTTTCCTTCAATACATTTTTTGGCGGACGGACTGAAGCGTATCGGAAACAGCGTTGTCAAGTTCTTACATTTGTA
53878	3	0.0001	AATTCATAATTCAATAATTCACTGATATGAAAAACATGACTTGCTTTTTTGTCTCATAAATAATTCAAATCTATAGATAGATTTTATGTTTTATAATATTAACAAATAAATGATA
54005	5	95.29	AATTCTGAAGCTCTGCAATTTGTTGTCTGTGGCCATATCGTCAGTTTCGCGTAAATTATGTTACTTCTTCTATTTAAGCAAACTGATGGCATATTTAGTTATTTCGGTATTTTTT
54093	6	58.4591	AATTCTAAGCTCCTGTCTGTTTTTCTCGAGCTTTTTTTGAAGTAAGCCCCTTTGTGCGCTTGTAAGTTCTCCCTGGCCTAGTTAAAGACAAAGGAATATGATTTGTAAAATATTT
54124	5	207.83	AATTCAGAAACCTGGAATACTCCATCCGTAACCTGGAATAGGTATCCTCCAACGTTCAAAGTCACTCGAAGATTTTCCTTGATTTAAGTAAGAACAATCTTCGGATTGTTACGGG
54127	2	78.6277	AATTCTATTTAAGAAAACTAAAAAATTATAATTCTAGCAACGCCTATTTAAAATATTTTTATATTTTAAATAGATTTTGCTGTTTTACTTTTAATTTACATGTATTATGTGATAA
54142	5	123.718	AATTCAGGTGGTAGCTGTAAAAAATGTCAATTCGCCACATTTATTTTCTTATTTCCTGACATTGTCATTCGTTCTTAATCTAAGGTTTTGACATCTTAGTTTGTACTACGACTTT
54332	8	28.088	AATTCGTCGACCGAAGCGCTAATAGGTTTTGACGGTAGGTTGATGAAGTTTGACTATTGAGAGGTCTGTCAATGATATTTGTAGGAGTTTAGATAGTTTGGGCAGTTTAAGTGAT
54376	10	43.5996	AATTCAATATGCAACCATTATAATTTATTTTGCAACCTTAAATAATTTAGAGTAAACTAGTTGCTAGAATAATCAATTAGCCAGTAATGGTAAAATAATATACAAAACGCACAAG
54398	1	65.3527	AATTCTCTTAAGCCTAAAATAACTGAAATTTTGGTAACTTAGGCTGGACGCAGGCACAAATAGAAAAAAGTTTTAGATAAAAACGTTTCCTTGCTTCCGCCCGAACGTACATTTT
54402	8	26.5417	AATTCACGACGATATCGGGCACCGAGTATAACGGGAGTAGCAAGAGCACAAAGACTGAGATGGCTGGGACACATTGAAGAATGGCGGAAGCAAAAGTTCCTGGTATATGATAATC
54426	1	91.3729	AATTCCCACTACAGGTTACGGATGGAGTCTTCCACATTCTTGGCTTCTGCTTTAAGTTGGTTTTCTTGTGGGAAGCAGAACGATCCTGGTCCAGTTAGTGGAGTGTTCGCTCCTG
54445	5	136.627	AATTCACCCTCTTTTTTAACAAGTTATCTGAAGAAGTGGAAGGTCTAAGATCGAAATTGTTTGAATTAGACTTTTTTGTTGTGATGCTTAGAGGCGCAAGACCTAAAAAAATAAA
54456	2	1.00089	AATTCAGAATTAATTAATAAATTAATTTATTTTTTATTTTGTAAGTTTTAATTTATTGTTTATTTTTGGTTTTTATTTTTTATTATTTTGTTATTTTAACAGAACGTCAGCGGTT
54517	5	121.871	AATTCTCAAGTCAGCAACTCGGACTTGCCTTTCAAATGCCATCTGTGCGAAGGTTCTTTTGCTGAACGAAACGAAGCTTTGGAACATATCAGAGACAAGCACGCCAGTGAATACG
54524	5	207.829	AATTCACAGTCGAAGTTGTAGTTTACTGCCCAAGGCGCAATTGCGTAGCGGGCGAACATTTATTATGAACAAAAAAAAATATGGGCGAAATTAAATATATTAAATTAATACTAAT
54609	6	66.139	AATTCGATACAAATGTCTATCGAGATGTTCCTTTTTTCGGAAATATTTTCCGCGATATAAGCACCATAAATTATTGGCTTTTCCACAGTCTCTGTAAAAATGGTTTCTTAGAGAA
54645	7	19.2376	AATTCTTCTGTTTTCTCTTGGTCTTTCCATACAAAGAAGCCTTCTGCCAAGCATGTCCCACATGTGCTCGATGGGGACTGTGCTGGCCATGGTAACACATCAATATTGCTGTTCT
54723	3	1.93092	AATTCCCCATTGAACATCGGAATAATGCGTGTTAAAGTATTTCGTTTAAAAAAACGAAAGTTTTCAAATATCTTGAGAACTATTAATTAGTAATTACTTTTAACTATTTTTACCA
54955	8	140.857	AATTCGTTGACTACGAAGCTGAAGAACAAGCTGGATATTGTGCAGAAAGATCATCTGTCGACCATCTCTTTTGTGTTACACAAATCCTGGAAAAAAATGTCAGCTGTGGCTGTTA
54994	6	96.9772	AATTCCATATTCGAAATATGCATCAGCAGCACCACATGCTACCATGGCCATATTTAAGGCTGCAGAACCTAAAGCCCTTAGACTAGTTGAAAGAACACAATTAATTCTGAATTTG
55052	8	88.9007	AATTCCATGTCTTGCTTGACTTTAATGATCTTATAGTATAAAAACTATCTATTTTTTCTAAAAGAGATGTTTCAATGTATTTAGAAAAATAATCAATTACAATAATATGGCGGTT
55060	9	8.84931	AATTCTTGGTTGTTGTATGAGTCATATCTTCACTTCATAGGAACATTTGAAATGTATCAAAGTACGTTATAGCGTTTCATCTTCATATTTTCACACTTAACAATGCTTTACTAGA
55077	1	102.601	AATTCTTGCTAAGAAAAGCATTTTGTAAGATACAAGATTATTTACACATAGAAAATGCTGTTTGACAACTTTTTGGAGAATTTCCATCAAAGGAGATTGAAATATGCCTATTTTT
55398	8	107.245	AATTCATCCTAAAAGCTCATTAATTATCAAGTAAATTTCTAAATATATCTATACCACGACAGCATTTCCTATAAATAATCAAAGATAAATATTTTTCTTACTATATTTATGAAAA
55463	4	86.2598	AATTCTTTTGCCATTTCGTCTGTATCATATTGCTCCTGGGAAGTCCTAGAATATGTAAGTAATTCAGTAAAAAAGTAATACTACTGTCAGATATATTTAAATACGTTTTTTTCTG
55766	5	60.3439	AATTCGCCCATTAGGTTGCGTATCTTCCCAATTCTTTCAATCAACGATACTGGTGATACTAGATATAACAGAAATTCAGTGAAAAATCTGTCAAATCAATAAATGGACTTGAATC
55849	8	96.2561	AATTCTCCGACTTGCGATTTTAAATAGTATGGATACTGTGAAGGTACGATACAATAAACCTACGCGCTGACCTGTAATTTTTAGACGGCCGACTATTCGATTGCATGTGAGCGCG
55956	5	93.8859	AATTCATTGTGCTCGACTCATCCGTCGATGTTTTAAATCAATAACCTGCATTTTGTCAATCATTTCCTCAGGTATAAACTAGGGATGGGATTTTTCCGACATATCGATAAATATC
55965	2	37.0533	AATTCGCCCGTCTGCAAATTTCTTTAAACTCAATTTTCTCAAAAGTAGCTTTTGTTGAGTTCGCCCTTACTATCCGCAACGCCTCATATTTTGCGCCACGAAATCGCCCATAAGG
55997	8	155.576	AATTCCTATGTTCAGGTTGGCGATGCAACAGACTGTATACATTTAGTATCTACCAGTAAAATTAGACCTAATGCTGATTTATTGCTGATAATATTTCGATACCCTGCTTGTTTTC
56181	7	97.0709	AATTCTGCGACCTGCAAATTTATTGACACAATTGAAAATGTCAGTGTTTGTTTTTCATGGCCTACATGTAAAATTGTTTATTCTTTTCCCTCGTACGATTTATAACAAAATTTCA
56321	10	70.1464	AATTCAAATGGGGAGAGGGTTTGGGTGGTAATTAATGGCGTTCGTTTTTCTATAGATTATTCTTGTGAGACAAAATAGAAGATCTAAGAAAAAACTACATTAATTTGATTGGTAT
56360	5	80.3043	AATTCAATTACCTCGGCATGCGGCAGTTTGATTTCGGAAAGGGCCAATATCGACTCTGAAATTCAGCACAAGATTAGCAGCGCCTCAAGAGCATTCTGGAAATTAAAAGACAGGG
56677	3	34.9563	AATTCGCTACGATATCCAAAGATATAGACTGGGATAAAGACGACGAACAAACAGTTACAACGAAAATAATCAAAACGGTAACGACAGATCCGATCGTAAAAACGACAGTCACAAG
56730	3	173.002	AATTCAAAATATCTTATGTAAAAATTTACAGAGTTCGGCATTAGGAAGGTATATAACTTTTGAACAATATTAAGAGAGTTATAACAAGCTGGATGAATGCTACGCGAAATTGCCA
56743	5	202.687	AATTCGTGCGAGTAGACTTCTTGTTCCAGAGATAGGGTGGCTACCCACTGTTTATAAGTCACTAAATTTTGAATCCACAGATACAAATTTATATTTATCTTAAAAGTTTTAGAAA
56766	3	159.056	AATTCTACGCAGACATTTGATAAAAAAAATAACTATATTATTTTTTAGATTTTTGTTTATAGTGATATTTTTCAAGTAAATGAACCAATCACAAAGGTATAGACAGAATACGAGT
57089	8	107.245	AATTCCTGGCGAAGACAAAGTCAATATGAGTGAACCTCTTCAATGGAATTTCGTAATGTAAAATAACGTTTGGAATTTCGTTCATAGATTCATAAAGATCCTAAAAATTGAAATA
57225	2	65.9467	AATTCATGCTCATTCACCCTATCTCTAATCTCCTCTGGGCAGTTTTAAACCTTAGAGCATCGTAACAACTAGACCAAACTTTGAAGTCGTTACTTTGAAGCCAACATGCTTTTCA
57469	8	26.5415	AATTCTCGGACAGCCCGACGGTAACGCCAGCTACATCTCGGACAGTTTTTGTGCTACGAAATTTTCCATAAGGTTGCGCATCTTTTTATTTCTTCGATCAACGCTGCTAATTTCC
57670	5	116.675	AATTCAAAAATCGATATCTCGAAATCTATTACAAATAATTGATTGTAGTTTTTCAAAAACTTTCTTTGCAAACAATATGTAAATATCTTTATAAATAAAAAGTTACACGATTGCT
57731	3	171.994	AATTCCCCATTGAATATCTGAATAATATACTGAGTGTTCCATTTAAAATAACAGATTTACTTACTTTTAAAGGTGACCAACGTTCAATACTAATTTTGTCTTACCCTGTATAACT
57839	7	4.42428	AATTCTTCGACGGTTAAAAGACCATCTGAGAGATCGTCGCGCTGGCATAGCTCGTGCCTTCGTTTGAAGTTGTTCAGCCAGGTGGCACTCGCCAGGAAGTTGTCTTTTCCCGATA
57848	5	118.179	AATTCTTCTTTTGAATTAAATATTGATATCATGTATTATAGAAAAAATCGGTGTCACTGTGGTCTGTGAAATGAACATTATCTCTGTGTGGTACACCTCTAAATGCTACGATAAT
58077	1	83.8604	AATTCGTTTCGAGCTGGTGACTTGATATTGGTGGCAGGTGACCTGCTGATTGTCGTGCGACTTGTGAGGTTTCGGAACTTTATATAGTTCTCTAATTATTTTTAAACAGTAGTTA
58517	3	80.9407	AATTCTTCCTTCAATTTTAAGCAATAATCGTAATACACAATGTACATAAATTGAAGAATTGAAATTTCAAGCGAAGATTTTGTAATTTCCAGACTTTATATAATCTCATTTTATA
58603	8	107.244	AATTCTACTAGTACTTTCTAAACTACGTGTTGAAACAGAGAAGAGAACTCTGAAGAGTAATATCCTAGGCTATATACAACTTTTACAGGAACCGTAGTTATTCAGCAGTGAAAAA
